# Supplementary material for: Epidemiology of low-energy lower extremity fracture in Chinese populations aged 50 years and above
Source: PLoS One. 2019 Jan 14;14(1):e0209203. doi: 10.1371/journal.pone.0209203 (PMC6331176; doi:10.1371/journal.pone.0209203)
Supplement: S1 Table — (XLSX) [file pone.0209203.s001.xlsx]

## Sheet: Sheet1
case 1; control 0	Age group	Ethnic origins	height	weight	BMI	Education	Professtional	Meat frequency	Milk	Soy products	Smoking	Alcohol consumption	Carbonate beverages	Coffee	Tea	House facing the sun	Building	Sleep duration	Supplement of Vd or Calcuim	History of past fracture	Region	rural or urban
0	1	1	3	4	3	3	7	2	0	3	1	1	3	0	1	1	2	1	1	0	3	1
0	1	1	5	3	2	2	4	1	0	1	1	0	0	0	0	1	2	1	0	0	2	1
0	1	1	4	4	1	2	1	1	1	2	0	1	0	0	0	1	2	2	1	1	1	1
0	2	1	5	5	3	3	6	2	0	3	0	0	0	0	0	1	2	1	0	0	1	1
0	2	1	4	6	4	1	5	2	0	2	0	1	0	0	0	1	2	1	0	0	1	1
0	2	1	4	4	3	1	5	1	0	1	0	0	0	0	0	1	2	1	0	0	3	1
0	3	1	3	3	1	1	7	1	1	2	0	0	0	0	2	1	2	2	0	0	1	1
0	1	1	5	4	1	3	1	2	0	2	0	0	0	0	0	1	2	1	0	0	2	1
0	1	1	4	3	1	2	3	1	0	3	1	1	4	0	1	1	2	2	1	0	1	1
0	1	1	5	4	1	3	4	2	1	2	1	0	0	0	2	1	3	2	0	0	2	1
0	1	1	4	5	3	3	3	2	0	2	0	1	0	0	2	1	3	1	0	0	1	1
0	1	1	4	5	3	3	4	1	1	1	1	1	0	0	1	1	2	1	1	0	1	1
0	1	1	5	5	1	3	6	3	3	3	0	0	0	0	0	1	2	1	0	0	2	1
0	1	1	4	4	1	2	3	1	1	1	0	1	0	0	0	1	2	1	1	0	1	1
0	1	1	5	5	1	3	3	3	2	3	1	1	0	0	4	1	2	1	0	0	2	1
0	1	1	5	4	1	2	1	2	2	2	1	0	0	0	1	1	2	1	0	0	1	1
0	1	1	5	4	1	3	1	2	0	2	0	0	0	0	0	1	2	1	0	0	2	1
0	1	1	6	5	1	3	4	1	0	2	1	1	0	0	1	1	2	1	0	0	1	1
0	1	1	5	5	1	2	6	1	3	2	1	1	4	0	2	1	2	1	1	0	2	1
0	1	1	5	5	1	2	4	2	0	2	1	0	0	0	1	1	2	1	0	0	3	1
0	1	1	5	4	1	2	3	1	1	1	0	1	0	0	0	1	2	1	1	0	1	1
0	1	1	5	5	1	2	3	2	2	2	0	0	0	0	0	1	2	1	0	0	3	1
0	1	1	5	4	1	2	1	2	0	1	0	1	4	0	1	1	2	1	0	0	1	2
0	1	1	5	4	1	2	4	1	1	2	1	1	0	0	2	1	2	1	0	0	1	1
0	1	1	5	6	3	3	3	1	3	3	1	1	0	0	1	1	2	1	1	0	3	1
0	1	1	4	4	1	3	7	1	0	2	1	1	0	0	1	0	3	2	0	0	1	1
0	1	1	5	5	3	2	4	2	0	2	0	1	0	0	0	1	2	2	0	1	2	2
0	1	1	5	7	4	3	1	1	2	1	1	1	4	0	4	1	2	1	0	0	2	1
0	1	1	5	5	1	2	4	3	0	2	1	1	0	0	2	1	3	1	0	0	1	1
0	1	1	5	4	1	2	1	1	3	3	1	1	0	0	1	1	2	1	1	0	1	1
0	1	1	5	5	3	3	1	1	1	1	0	0	2	0	1	1	2	1	0	0	2	1
0	1	1	5	5	3	3	1	3	0	2	0	0	0	0	0	1	2	2	0	0	2	1
0	1	1	5	4	1	1	4	2	3	2	1	1	0	0	1	1	3	2	1	0	1	1
0	1	1	5	6	4	2	4	1	2	1	1	1	0	0	0	1	2	1	0	0	3	1
0	1	1	5	4	1	1	4	2	2	4	1	1	0	0	1	1	2	1	0	0	2	1
0	1	1	5	5	1	3	4	1	0	2	1	0	0	0	0	1	2	2	0	0	3	1
0	1	1	5	5	3	2	4	1	0	2	0	1	0	0	1	1	2	1	0	0	1	1
0	1	1	5	4	1	1	4	1	2	1	0	0	4	0	0	1	2	1	0	0	1	1
0	1	1	6	6	3	2	1	1	3	2	1	1	0	0	0	1	2	1	1	0	2	1
0	1	1	5	5	3	3	1	1	1	2	0	0	4	0	0	1	3	1	0	0	2	1
0	1	1	5	5	1	3	4	2	0	2	0	1	0	0	2	1	2	1	1	1	3	1
0	1	1	4	6	4	1	6	1	1	3	1	0	0	0	0	1	2	1	0	0	3	1
0	1	1	4	3	1	3	3	2	4	2	0	1	0	0	0	1	2	2	1	1	2	1
0	1	1	4	4	1	2	4	2	0	2	1	1	0	0	1	1	2	2	0	0	1	1
0	1	1	4	4	1	3	1	1	2	1	0	1	3	0	0	1	2	2	0	0	1	1
0	1	1	4	5	3	3	7	1	4	3	1	1	4	0	1	1	2	1	0	0	1	1
0	1	1	3	4	3	3	4	2	0	3	1	0	0	0	1	1	2	1	0	0	2	2
0	1	1	4	4	3	2	3	3	0	3	0	0	0	0	0	1	3	2	0	0	2	1
0	1	1	4	4	1	3	5	2	2	4	0	1	0	0	1	1	2	2	1	0	3	1
0	1	1	6	6	3	2	1	1	3	1	1	1	4	4	1	1	3	1	0	0	3	1
0	1	1	5	5	3	3	1	2	3	3	1	1	0	0	1	1	2	1	0	0	2	1
0	1	1	5	5	3	2	1	2	2	2	1	1	0	0	0	1	2	1	1	1	1	1
0	1	1	5	5	1	3	1	1	2	2	0	1	0	0	3	1	2	1	0	0	2	1
0	1	1	5	5	1	3	1	1	2	2	0	0	0	0	3	1	2	1	0	0	2	1
0	1	1	4	4	1	3	4	1	0	2	1	1	0	0	1	1	2	1	1	0	1	1
0	1	1	4	4	1	2	1	1	0	1	1	1	2	0	1	1	2	2	0	0	2	1
0	1	1	5	4	1	3	1	1	3	1	1	1	3	0	0	1	2	2	0	0	2	2
0	1	1	5	6	3	1	4	1	2	1	1	1	4	0	4	1	2	1	0	0	1	1
0	1	1	5	6	3	3	4	3	4	3	1	1	0	0	1	1	2	1	0	1	2	1
0	1	1	5	6	3	3	4	3	4	3	1	1	0	0	1	1	2	1	1	1	2	1
0	1	1	5	5	3	4	4	1	1	1	1	0	0	0	0	1	2	1	0	0	2	1
0	1	1	4	4	3	3	4	2	0	3	1	1	0	0	1	1	2	1	0	0	3	1
0	1	1	5	5	3	2	4	3	0	2	0	0	0	0	0	1	2	2	0	0	2	1
0	1	1	4	4	1	1	4	1	0	2	1	1	0	0	0	1	3	1	0	0	3	1
0	1	1	5	4	1	2	4	3	0	2	1	0	0	0	1	1	2	2	0	0	1	1
0	1	1	5	4	1	1	4	1	0	2	1	1	0	0	0	1	2	2	0	0	2	1
0	1	1	5	5	1	3	3	1	0	3	0	1	0	0	1	1	2	2	1	0	1	1
0	1	1	4	3	1	3	4	3	0	3	1	1	0	0	2	1	2	2	0	0	2	1
0	1	1	4	3	1	2	3	1	0	1	1	0	0	0	1	1	2	2	0	0	1	1
0	1	1	5	4	1	3	4	1	1	2	0	1	4	0	0	1	2	2	1	0	2	2
0	1	1	4	4	1	1	6	3	2	3	0	0	0	0	0	1	2	1	0	0	3	1
0	1	1	5	4	1	4	1	1	1	3	1	1	0	0	3	1	2	1	0	0	2	1
0	1	1	5	5	3	3	5	1	2	3	1	0	0	0	1	1	2	1	0	0	3	1
0	1	1	5	5	3	3	3	1	1	2	0	1	0	0	0	1	2	2	1	0	1	1
0	1	1	5	5	1	1	3	3	2	2	0	1	0	0	3	1	2	2	1	1	2	1
0	1	1	5	4	1	3	4	1	3	3	0	1	0	0	1	1	2	1	0	0	1	1
0	1	1	4	4	1	2	4	1	4	1	1	1	0	0	1	1	2	2	1	0	1	2
0	1	1	5	6	3	2	4	1	0	1	0	1	0	0	1	1	3	2	1	1	2	1
0	1	1	5	4	1	3	1	1	1	1	1	0	3	3	1	1	2	2	0	0	1	2
0	1	1	4	5	3	3	1	1	2	1	0	0	4	0	1	1	3	2	0	0	3	1
0	1	1	6	7	3	2	3	2	0	3	1	1	0	0	2	1	2	1	1	0	3	1
0	1	1	5	5	3	3	1	2	0	2	1	1	0	0	1	1	2	1	0	0	2	1
0	1	1	5	4	1	2	4	3	0	1	1	1	0	0	1	1	2	1	0	1	3	1
0	1	1	4	5	3	4	4	3	4	2	0	1	0	0	2	1	2	2	1	0	1	1
0	1	1	4	4	1	4	1	1	0	2	0	1	0	0	2	1	2	2	0	0	1	1
0	1	1	5	4	1	3	5	1	0	2	0	1	0	0	1	1	2	1	0	0	1	1
0	1	1	5	5	1	2	5	2	2	2	0	1	0	0	0	1	2	1	1	0	2	1
0	1	1	4	5	3	3	1	1	1	1	1	1	0	0	1	1	2	2	0	0	1	1
0	1	1	4	4	1	3	4	1	0	4	1	1	4	0	1	1	2	1	0	0	3	1
0	1	1	5	5	3	3	1	1	1	1	0	1	0	0	0	1	3	2	0	0	1	1
0	1	1	5	5	3	2	4	2	0	2	0	1	0	0	0	1	2	2	1	1	1	2
0	1	1	5	4	1	3	4	1	0	2	0	0	4	0	0	1	2	2	0	0	1	1
0	1	1	5	5	3	1	4	1	0	2	1	1	0	0	0	1	3	1	1	0	1	1
0	1	1	4	5	4	1	3	2	2	3	1	1	0	0	2	1	2	1	1	0	2	1
0	1	1	5	4	1	3	5	2	2	1	0	0	0	0	2	1	2	1	0	0	2	1
0	1	1	5	4	1	3	5	3	3	2	1	1	0	0	1	1	2	1	1	0	3	1
0	1	1	4	4	1	2	4	1	0	3	1	0	0	0	1	1	3	1	0	0	3	1
0	1	1	5	5	3	3	5	1	0	1	0	0	0	0	1	1	3	2	0	0	1	1
0	1	1	5	6	3	2	1	1	4	2	1	1	0	0	1	1	2	2	1	0	1	1
0	1	1	4	3	1	3	4	3	0	2	1	1	0	0	1	1	2	2	0	0	2	1
0	1	1	4	4	1	3	3	1	3	2	1	1	4	0	0	1	2	2	0	0	2	1
0	1	1	5	4	1	3	1	2	4	2	0	1	0	0	4	1	2	2	0	0	2	1
0	1	1	4	4	1	2	3	1	1	1	1	1	0	0	0	1	2	2	0	0	1	1
0	1	1	4	4	1	2	3	1	1	2	1	1	0	0	0	1	2	2	0	0	3	1
0	1	1	5	4	1	2	4	2	3	2	0	1	0	0	0	1	2	2	0	0	3	1
0	1	1	5	4	1	1	4	2	0	2	1	1	0	0	2	1	2	2	1	0	2	1
0	1	1	4	5	3	3	3	1	2	2	1	1	0	0	0	1	2	2	0	0	1	1
0	1	1	5	5	3	3	1	2	1	3	0	0	0	0	1	1	2	2	0	0	1	1
0	1	1	5	5	3	1	3	3	0	1	1	1	0	0	3	1	2	2	1	0	2	1
0	1	1	4	5	3	3	3	1	2	2	1	1	0	0	1	1	2	2	0	0	3	1
0	1	1	5	6	3	4	1	2	3	2	0	1	0	3	0	1	3	1	1	0	3	1
0	1	1	4	4	1	3	5	1	4	2	1	0	0	0	1	1	2	2	0	0	1	1
0	1	1	5	5	3	3	7	3	0	2	0	1	0	0	1	1	3	2	1	1	2	1
0	1	1	6	5	1	3	5	1	1	2	0	0	0	0	1	1	2	2	0	0	2	1
0	1	1	4	4	3	2	3	3	3	1	0	1	4	0	0	1	2	1	0	0	3	1
0	1	1	4	4	1	3	5	1	0	2	1	1	0	0	2	1	2	1	0	0	2	1
0	1	1	4	4	1	3	1	2	3	3	0	1	0	0	0	1	2	2	0	1	2	1
0	1	1	5	4	1	2	5	2	2	2	1	1	0	0	0	1	2	2	1	0	2	1
0	1	1	5	4	1	3	5	3	0	3	1	0	0	0	1	1	2	2	0	0	2	1
0	1	1	5	7	4	2	4	3	0	3	0	1	0	0	0	1	2	2	0	0	2	1
0	1	1	4	4	1	3	1	1	1	1	0	0	0	0	1	1	2	2	0	0	1	1
0	1	1	5	6	3	2	3	3	0	3	1	1	3	0	0	1	2	2	0	0	2	1
0	1	1	3	3	1	1	6	1	0	2	1	1	0	0	1	1	3	2	0	0	3	1
0	1	1	4	4	1	4	5	1	0	3	0	1	4	0	2	1	3	1	0	0	3	1
0	1	1	5	4	1	3	6	1	4	4	1	1	0	0	0	1	3	2	0	0	3	1
0	1	1	4	3	1	2	3	2	2	4	1	1	0	0	0	1	2	1	0	0	2	2
0	1	1	5	4	1	2	5	1	2	2	1	0	0	0	2	1	3	2	0	0	1	1
0	1	1	5	5	1	2	4	2	2	2	1	0	3	0	0	1	2	2	0	0	1	1
0	1	1	4	4	1	1	5	1	3	0	1	0	0	0	0	1	2	2	0	0	1	1
0	1	1	5	4	1	2	3	1	1	1	0	0	0	0	1	1	2	1	0	0	1	1
0	1	1	5	4	1	2	4	1	1	2	0	0	0	0	0	1	2	2	0	0	1	1
0	1	1	5	7	4	3	1	2	0	2	0	1	0	0	0	1	2	1	0	0	1	1
0	1	1	4	4	1	2	7	2	1	4	1	0	0	0	0	1	2	2	0	0	1	2
0	1	1	4	4	1	4	5	3	0	1	0	0	0	0	0	1	2	2	0	0	2	1
0	1	1	4	5	3	2	5	1	3	2	0	1	4	0	2	1	2	2	1	0	1	1
0	1	1	5	6	3	3	5	1	0	1	1	1	0	0	3	1	2	2	0	0	1	2
0	1	1	5	5	1	1	5	3	2	2	1	1	0	0	0	1	3	2	0	0	3	1
0	1	1	4	4	3	1	4	2	1	2	0	0	0	0	0	1	2	1	0	0	2	1
0	1	1	5	6	3	4	5	2	4	1	0	0	0	0	1	1	2	2	0	1	3	1
0	1	1	5	6	3	4	1	2	4	1	0	1	0	0	1	1	2	2	1	1	3	1
0	1	1	5	6	3	3	6	4	0	3	1	1	4	0	0	1	2	1	0	0	1	1
0	1	1	5	4	1	3	1	3	4	3	1	1	0	0	0	1	2	1	0	0	2	1
0	1	1	5	3	1	2	5	2	2	1	1	1	0	4	1	1	3	2	0	1	3	1
0	1	1	5	5	3	3	5	1	0	1	0	0	0	0	0	1	2	2	1	0	3	1
0	1	1	4	5	3	3	6	2	3	2	1	1	0	0	3	1	3	2	0	1	2	1
0	1	1	5	5	3	2	5	2	1	1	1	1	0	0	0	1	2	2	0	0	1	1
0	1	1	5	7	4	3	3	1	0	3	1	1	0	0	1	1	3	2	0	0	1	1
0	1	1	5	4	1	3	5	2	2	4	1	1	0	0	4	1	2	1	0	0	1	1
0	1	1	5	6	3	3	4	3	3	1	1	0	0	0	4	1	2	2	0	0	1	2
0	1	1	5	6	4	2	5	1	0	2	1	1	0	0	1	1	2	2	1	0	1	1
0	1	1	5	5	3	1	5	1	1	1	1	0	0	0	0	1	2	1	0	0	2	1
0	1	1	4	4	1	3	1	3	0	3	0	0	0	0	0	1	2	2	0	0	3	1
0	1	1	5	4	1	3	4	3	0	2	0	0	3	0	2	1	3	2	0	0	1	1
0	1	1	5	4	1	1	3	3	3	3	0	1	0	0	0	1	2	2	0	0	3	1
0	1	1	5	6	3	1	3	1	1	1	1	1	0	0	0	1	3	2	0	0	1	1
0	1	1	4	4	1	3	3	1	0	2	0	1	0	0	0	1	2	1	0	0	3	1
0	1	1	5	5	3	2	4	1	1	1	1	0	3	0	1	1	2	2	0	0	1	1
0	1	1	5	4	1	2	5	3	1	2	0	1	0	0	0	1	2	1	1	0	1	1
0	1	1	4	3	1	2	4	2	3	3	0	0	0	0	1	1	3	2	0	0	1	1
0	1	1	6	6	3	1	5	2	1	1	1	0	0	0	0	1	3	1	0	0	2	1
0	1	1	4	3	1	3	1	3	3	3	0	1	0	0	1	1	2	2	0	0	2	1
0	1	1	5	6	3	3	5	1	0	1	1	1	0	0	0	1	2	2	1	0	1	1
0	1	1	5	5	3	2	5	1	0	1	1	0	0	0	0	1	2	2	0	0	1	2
0	1	1	5	6	4	1	4	2	0	2	0	0	0	0	2	1	3	2	0	0	1	1
0	1	1	5	6	3	4	5	2	1	1	1	1	0	0	1	1	2	2	1	0	3	1
0	1	1	5	5	3	2	4	3	0	2	1	0	0	0	0	1	2	2	0	0	1	1
0	1	1	5	4	1	4	3	2	4	2	1	1	0	0	0	1	2	1	0	0	3	1
0	1	1	4	4	1	1	4	1	1	2	1	0	0	0	0	1	2	1	1	0	3	1
0	1	1	4	5	4	3	4	1	1	1	1	1	0	0	1	1	2	2	1	0	1	1
0	1	1	5	5	3	1	6	1	1	2	0	1	4	0	0	1	2	2	0	0	1	2
0	1	2	4	5	3	2	5	1	1	2	0	0	0	1	0	1	3	2	0	0	3	1
0	1	1	5	6	4	2	4	1	2	1	0	1	2	0	0	1	2	2	0	0	3	1
0	1	1	4	5	3	3	4	3	3	2	1	1	0	0	3	1	2	2	1	0	2	1
0	1	1	5	4	1	2	3	4	2	1	0	0	3	0	3	1	2	2	0	0	1	1
0	1	1	4	4	3	1	3	3	2	2	0	1	0	0	1	1	2	2	1	0	3	1
0	1	1	4	4	1	1	5	2	2	2	1	1	0	0	0	1	2	1	0	1	2	1
0	1	1	5	5	3	2	7	2	1	1	0	1	0	0	0	1	2	1	0	0	3	1
0	1	1	4	4	1	3	3	1	0	2	1	1	0	0	0	1	2	2	0	0	1	1
0	1	1	4	4	1	1	7	3	3	3	0	0	0	0	0	1	2	2	0	0	1	1
0	1	1	4	4	1	3	5	1	0	2	1	1	0	0	1	1	2	2	0	0	3	1
0	1	1	5	3	2	2	5	1	1	3	1	0	2	0	3	1	2	2	0	0	2	1
0	1	1	4	4	1	1	5	2	3	2	1	0	0	0	2	1	3	2	1	0	1	1
0	1	1	5	5	3	1	3	1	3	1	0	0	3	0	1	1	2	2	0	0	1	1
0	1	1	4	4	1	3	5	1	1	1	0	0	4	0	0	1	3	1	0	0	3	1
0	1	1	4	4	1	2	6	1	1	1	1	1	3	0	2	1	2	2	1	0	3	1
0	1	1	5	5	3	3	4	1	1	1	0	0	3	0	2	1	2	1	1	0	2	1
0	2	1	5	5	1	2	5	1	1	3	0	1	0	0	0	1	2	1	0	0	2	1
0	2	1	4	4	3	1	4	1	0	2	1	1	0	0	0	1	3	1	0	0	2	1
0	2	1	5	4	1	3	5	1	2	2	1	1	0	0	1	1	3	2	0	0	2	1
0	2	1	4	4	1	1	3	2	0	2	0	0	0	0	0	1	2	2	1	1	2	1
0	2	1	4	5	3	1	4	1	1	1	1	1	0	0	0	1	2	1	0	0	3	1
0	2	1	4	4	1	4	4	4	2	4	0	0	0	0	1	1	2	2	1	0	3	1
0	2	1	5	4	1	3	6	2	1	2	0	0	0	0	0	1	2	2	0	0	3	1
0	2	1	6	5	1	4	7	1	2	2	1	1	0	0	1	1	2	2	1	0	3	1
0	2	1	6	4	1	1	6	1	4	4	1	1	0	0	1	1	2	2	0	0	1	1
0	2	1	4	4	3	2	5	1	0	2	1	0	0	0	2	1	2	1	0	0	2	1
0	2	1	5	6	3	4	5	3	0	2	1	0	0	0	0	1	2	1	0	0	2	1
0	2	1	5	4	1	3	5	3	4	3	0	0	0	0	0	1	2	1	0	0	2	1
0	2	1	4	5	3	2	3	2	1	2	1	1	0	0	1	1	2	2	1	0	3	1
0	2	1	5	4	1	4	5	1	0	1	0	0	0	4	4	1	2	2	0	0	3	1
0	2	1	4	4	1	1	3	3	0	3	1	0	0	0	0	1	2	1	0	0	2	1
0	2	1	5	6	3	3	3	1	4	3	0	0	0	0	1	1	2	2	1	0	1	1
0	2	1	5	5	1	3	5	3	4	3	1	1	0	0	1	1	2	2	0	0	2	1
0	2	1	5	5	1	3	4	2	3	3	1	1	0	0	2	1	2	1	0	0	2	1
0	2	1	4	4	1	1	3	1	0	3	1	0	0	0	0	1	3	1	0	0	3	1
0	2	1	4	5	3	1	6	1	0	3	1	0	0	0	1	1	2	2	0	0	3	1
0	2	1	4	4	1	2	5	1	1	1	0	0	0	0	1	1	2	2	0	0	1	1
0	2	1	5	4	1	3	5	3	2	3	0	0	0	0	0	1	2	1	0	0	2	1
0	2	1	4	5	3	4	5	2	1	2	1	1	0	0	4	1	2	2	0	0	3	1
0	2	1	5	4	1	1	6	1	0	2	1	1	0	0	1	1	2	2	1	0	3	1
0	2	1	5	6	3	4	5	1	4	3	1	1	0	0	3	1	3	2	0	0	1	1
0	2	1	4	4	1	1	5	3	0	1	1	0	0	0	3	1	2	2	1	0	3	1
0	2	1	4	4	1	1	5	1	4	2	1	0	0	0	0	1	2	2	0	0	1	1
0	2	1	4	4	1	1	5	1	2	2	0	0	4	0	1	1	3	2	0	0	1	1
0	2	1	5	5	3	3	6	1	0	2	1	1	0	0	0	1	3	2	0	0	1	1
0	2	1	5	6	3	4	5	1	2	2	1	0	0	0	1	1	2	2	1	0	1	1
0	2	1	4	4	1	2	4	1	1	1	0	1	0	0	0	1	2	2	0	0	1	2
0	2	1	4	3	1	3	5	0	1	1	0	0	0	0	1	1	2	2	1	0	1	2
0	2	1	6	7	3	2	1	1	0	2	1	0	0	0	0	1	2	1	0	0	1	1
0	2	1	5	5	1	1	6	1	3	3	0	0	0	0	0	1	2	1	0	0	3	1
0	2	1	5	6	3	1	4	2	2	2	1	1	0	0	0	1	3	2	0	0	1	2
0	2	1	5	5	1	2	5	1	2	2	0	0	0	0	0	1	2	1	0	0	1	1
0	2	1	5	5	1	3	5	4	4	4	0	0	0	0	0	1	2	2	1	0	2	1
0	2	1	5	3	2	2	3	3	0	3	1	1	0	0	0	1	3	2	0	1	2	1
0	2	1	5	5	1	1	4	2	0	2	1	1	0	0	0	1	2	1	0	0	1	1
0	2	1	4	3	1	2	4	1	1	3	0	0	0	0	1	1	2	2	0	0	1	1
0	2	1	5	4	1	3	5	2	2	2	0	0	0	0	0	1	2	2	1	0	2	1
0	2	1	4	4	1	1	3	1	0	4	0	0	0	0	0	1	2	1	0	0	3	1
0	2	1	4	5	3	4	7	1	1	2	0	1	0	0	0	1	2	1	0	0	3	1
0	2	1	5	5	3	2	5	2	3	4	0	1	0	0	0	1	2	1	0	0	1	1
0	2	1	5	4	1	3	5	2	0	2	0	1	0	0	4	1	2	1	0	0	2	1
0	2	1	5	5	3	1	4	2	0	2	0	0	0	0	1	1	2	2	0	0	2	1
0	2	1	4	3	1	3	5	1	0	2	0	0	0	0	0	1	2	2	1	0	1	1
0	2	1	5	5	3	1	3	1	2	1	1	0	0	0	0	1	2	1	0	0	1	2
0	2	1	5	5	1	2	5	1	0	1	0	0	0	0	0	1	2	1	0	0	1	1
0	2	1	5	5	1	4	5	1	0	3	0	0	0	4	1	1	2	2	1	0	3	1
0	2	1	4	4	3	1	4	4	0	4	1	1	0	0	4	1	2	1	0	0	1	1
0	2	1	5	4	1	3	5	3	0	2	0	1	0	0	4	1	2	1	1	0	2	1
0	2	1	4	4	3	3	5	3	0	2	0	1	0	0	1	1	2	2	0	0	2	1
0	2	1	5	6	3	3	1	2	0	2	0	1	0	0	0	1	2	2	0	0	2	1
0	2	1	5	4	1	2	5	2	1	2	1	1	0	0	0	1	2	1	0	0	2	1
0	2	1	4	4	1	1	7	1	1	1	0	1	0	0	0	1	2	2	0	0	2	1
0	2	1	5	5	1	3	4	2	2	2	0	0	0	0	0	1	2	1	0	0	2	1
0	2	1	5	4	1	2	6	1	3	2	0	0	0	0	0	1	2	1	0	0	3	1
0	2	1	4	4	1	3	5	3	0	2	1	0	0	0	2	1	2	2	0	0	2	1
0	2	1	4	5	3	1	5	1	3	1	0	0	0	0	0	1	2	1	0	0	2	1
0	2	1	6	6	3	4	5	1	1	1	1	1	0	0	0	1	2	2	0	0	2	1
0	2	1	5	6	3	3	5	2	2	2	0	0	0	0	1	1	2	2	1	0	2	1
0	2	1	4	3	1	4	5	1	0	2	0	0	0	0	0	1	2	1	0	0	1	1
0	2	1	5	4	1	3	5	3	4	3	0	1	0	0	1	1	2	2	0	1	2	1
0	2	1	6	5	1	3	4	2	0	1	1	1	0	0	0	1	2	1	0	0	2	1
0	2	1	5	5	1	3	5	1	1	2	0	1	0	0	0	1	2	2	0	0	3	1
0	2	1	5	5	3	3	5	1	2	2	1	1	0	0	0	1	2	2	0	0	2	1
0	2	1	5	4	1	3	5	2	1	2	1	0	0	0	1	1	2	2	1	0	1	1
0	2	1	5	3	1	2	5	1	1	1	0	0	0	0	1	1	2	2	1	0	2	1
0	2	1	5	5	3	3	5	2	1	4	1	0	0	0	0	1	3	1	0	0	1	1
0	2	1	5	4	1	3	3	2	0	1	0	0	0	0	2	1	2	2	0	0	2	1
0	2	1	4	5	3	3	4	2	0	2	1	1	0	0	0	1	2	2	0	0	1	1
0	2	1	4	4	3	1	3	1	4	1	0	1	0	0	0	1	2	1	0	0	3	1
0	2	1	5	4	1	3	3	1	0	2	1	0	0	0	0	1	3	2	0	0	1	1
0	2	1	5	6	3	2	5	3	0	2	0	0	0	0	1	1	2	2	1	0	2	1
0	2	1	4	4	3	1	6	1	4	1	0	1	0	0	0	1	2	1	0	0	3	1
0	2	1	5	5	3	3	5	1	1	3	0	1	0	0	4	1	2	1	0	0	3	1
0	2	1	4	2	2	2	5	1	0	2	1	0	0	0	1	1	2	2	0	0	1	1
0	2	1	5	5	1	2	6	2	2	2	0	0	0	0	0	1	2	1	0	0	1	1
0	2	1	5	6	3	1	5	2	0	2	1	1	0	0	0	1	2	1	0	1	2	1
0	2	1	5	5	3	1	3	3	2	3	1	0	0	0	2	1	2	2	1	0	3	2
0	2	1	5	4	1	1	6	2	0	2	1	1	0	0	0	1	2	2	1	0	3	1
0	2	1	5	4	1	1	5	2	0	2	1	1	0	0	0	1	2	2	1	0	3	1
0	2	1	5	5	3	3	5	1	1	2	0	0	0	0	2	1	2	1	0	0	2	1
0	2	1	5	3	1	3	5	3	4	3	0	0	0	0	0	1	3	1	0	1	2	1
0	2	1	4	2	2	4	5	2	2	2	0	1	0	0	0	1	2	2	0	0	3	1
0	2	1	5	5	1	4	5	1	0	4	1	0	0	0	0	1	2	1	0	0	1	1
0	2	1	4	4	1	2	5	2	1	1	0	0	0	0	0	1	3	2	0	0	3	1
0	2	1	5	4	1	1	5	2	1	1	1	0	0	0	1	1	3	2	0	0	1	1
0	2	1	5	5	3	4	5	1	1	1	0	0	0	0	1	1	2	2	0	0	2	1
0	2	1	4	4	1	3	5	1	0	1	0	0	0	0	1	1	2	2	1	0	2	1
0	2	1	5	4	1	4	5	1	1	1	0	0	0	0	0	1	2	2	0	0	1	1
0	2	1	5	6	3	4	3	2	2	2	0	0	0	0	0	1	2	2	0	0	3	1
0	2	1	4	2	2	1	5	3	0	2	1	1	0	0	0	1	3	2	0	0	3	1
0	2	1	5	5	3	2	3	1	2	2	0	1	0	0	2	1	2	1	0	0	1	1
0	2	1	4	5	3	3	5	3	3	1	0	1	0	0	0	1	2	1	0	0	2	1
0	2	1	4	4	1	1	5	2	2	1	0	0	0	0	0	1	3	1	0	0	1	1
0	2	1	6	3	2	2	6	3	1	3	0	0	0	0	0	1	2	2	0	0	3	1
0	2	1	4	3	1	1	7	1	3	3	0	1	0	0	0	1	2	2	1	1	3	1
0	2	1	5	4	1	1	6	3	0	2	1	0	0	0	0	1	3	2	0	0	2	2
0	2	1	4	4	1	2	3	2	1	2	1	0	0	0	1	1	2	2	1	0	1	1
0	2	1	4	4	3	4	5	1	0	2	0	0	0	0	0	1	2	1	0	0	1	1
0	2	1	6	7	3	4	5	1	1	2	0	1	0	0	0	1	2	1	0	0	3	1
0	2	1	5	6	3	1	4	2	2	1	0	1	0	0	0	1	2	1	1	0	1	2
0	2	1	4	4	1	3	5	2	2	3	0	0	0	0	3	1	2	2	1	1	2	1
0	2	1	4	3	1	1	6	1	1	1	0	0	0	0	0	1	3	1	0	0	3	1
0	2	1	5	5	3	2	6	4	1	2	0	1	0	0	1	1	2	2	0	0	3	1
0	2	1	4	6	4	4	5	2	0	2	0	0	0	0	2	1	3	2	1	0	3	1
0	2	1	5	3	2	1	5	1	2	1	1	0	0	0	0	1	2	2	0	0	1	1
0	2	1	5	5	3	2	1	1	1	1	0	0	0	0	1	1	2	2	1	0	1	1
0	2	1	5	4	1	2	6	1	1	3	0	1	0	0	0	1	2	1	1	0	3	1
0	2	1	4	4	3	2	5	1	0	2	1	0	0	0	0	1	2	1	0	0	1	1
0	2	1	5	5	3	1	6	3	0	2	0	0	0	0	2	1	2	1	0	0	3	1
0	2	1	4	5	3	1	4	1	0	3	1	0	0	0	0	1	3	2	0	0	3	1
0	2	1	5	5	1	2	6	2	1	3	1	0	0	0	4	1	2	2	1	1	1	1
0	2	1	5	3	2	4	5	2	1	1	0	0	0	0	4	1	2	2	1	1	3	1
0	2	1	4	5	4	3	5	1	1	2	0	0	0	0	0	1	2	1	0	0	1	1
0	2	1	4	4	3	2	4	2	1	2	1	1	0	0	1	1	2	2	1	0	1	1
0	2	1	5	4	1	2	7	1	2	2	1	1	0	0	0	1	2	1	0	0	3	1
0	2	1	4	4	1	2	4	1	1	1	1	1	0	0	0	1	2	2	0	0	1	1
0	2	1	5	4	1	1	3	2	3	2	0	0	0	0	0	1	2	1	0	0	3	1
0	2	1	6	6	3	1	6	2	0	1	0	0	0	0	0	1	3	1	0	0	1	1
0	2	1	5	4	1	4	5	1	1	1	1	1	0	0	1	1	2	2	0	0	1	1
0	2	1	5	4	1	3	5	3	4	3	1	0	0	0	1	1	2	2	1	0	2	1
0	2	1	4	3	1	3	6	1	0	1	1	1	0	0	0	1	2	2	0	0	1	1
0	2	1	4	4	1	3	5	3	0	3	0	0	0	0	0	1	2	1	0	0	2	1
0	2	1	5	4	1	2	4	1	1	3	0	0	0	0	0	1	3	1	0	0	1	1
0	2	1	5	5	1	3	5	1	2	2	1	1	0	0	0	1	2	2	1	0	2	1
0	2	1	4	5	3	1	3	2	0	2	0	0	0	0	1	1	2	2	1	0	3	1
0	2	1	4	5	4	3	6	3	1	2	0	0	0	0	0	1	2	1	0	0	1	1
0	2	1	4	4	1	2	5	3	0	2	0	0	0	0	1	1	2	2	0	0	1	1
0	2	1	5	6	3	3	5	2	4	2	0	0	0	0	1	1	2	2	0	0	2	1
0	2	1	5	6	4	3	5	2	4	3	0	0	0	0	1	1	2	2	1	0	2	1
0	2	1	4	4	1	1	4	2	0	3	0	1	0	0	0	1	2	2	0	0	2	1
0	2	1	5	4	1	2	4	1	1	1	0	0	0	0	1	1	2	2	1	0	1	1
0	2	1	4	4	1	1	5	1	4	3	0	1	0	0	0	1	2	1	0	0	1	1
0	2	1	4	4	1	1	7	1	2	2	0	1	0	0	1	1	2	2	0	0	3	1
0	2	1	4	5	3	3	5	3	4	2	0	0	0	0	1	1	2	2	1	0	2	1
0	2	1	4	3	1	4	5	3	1	1	0	1	0	0	0	1	2	2	1	1	3	1
0	2	1	4	5	4	1	7	3	0	2	0	1	0	0	0	1	2	1	0	0	3	1
0	2	1	5	4	1	3	1	1	3	1	0	0	0	0	4	1	2	2	0	0	1	1
0	2	1	4	5	3	4	1	1	0	2	0	1	0	0	0	1	2	2	0	0	1	1
0	2	1	5	4	1	2	5	3	0	4	0	0	0	0	0	1	2	2	1	0	1	1
0	2	1	4	3	1	4	4	3	2	1	0	1	0	0	1	1	2	2	0	1	3	1
0	2	1	4	4	1	1	6	2	3	2	1	0	0	0	0	1	2	2	1	0	3	1
0	2	1	5	5	1	3	3	3	4	3	0	1	0	0	0	1	3	2	1	0	2	1
0	2	1	5	4	1	3	5	2	0	1	0	0	0	0	0	1	2	1	0	0	2	1
0	2	1	5	4	1	1	5	3	0	2	0	0	0	0	0	1	2	1	0	0	1	1
0	2	1	4	4	1	1	6	2	0	3	0	0	0	0	2	1	2	2	0	0	3	1
0	2	1	4	3	2	4	5	1	1	1	0	1	0	0	0	1	3	1	0	0	1	1
0	2	1	5	5	3	2	3	3	3	2	0	0	0	0	2	1	2	1	1	0	3	2
0	2	1	4	4	1	3	5	1	1	3	0	0	0	0	0	1	2	2	1	0	1	1
0	2	1	4	4	1	2	1	1	1	1	0	1	0	0	0	1	2	2	0	0	1	1
0	2	1	5	4	1	2	6	2	1	2	0	0	0	0	0	1	3	2	0	0	1	1
0	2	1	5	5	1	2	4	2	0	2	0	0	0	0	0	1	2	2	1	0	1	1
0	2	2	4	4	3	1	5	3	0	4	0	0	0	0	0	1	2	2	0	0	3	1
0	2	1	4	5	3	3	5	3	4	4	0	0	0	0	2	1	2	1	0	0	3	1
0	2	1	4	4	3	2	6	2	1	2	0	0	0	0	2	1	2	2	0	0	1	1
0	2	1	4	4	3	3	5	1	1	2	0	0	0	0	0	1	2	1	0	0	1	1
0	2	1	5	4	1	2	5	1	1	1	1	1	0	0	0	1	2	2	1	0	1	1
0	2	1	5	4	1	2	3	1	1	1	0	0	0	0	0	1	2	2	0	0	1	1
0	2	1	4	5	3	2	3	3	2	2	1	0	0	0	0	1	2	2	0	0	3	1
0	2	1	4	6	4	1	6	1	1	2	0	0	0	0	0	1	2	1	0	0	1	1
0	2	1	5	4	1	4	5	1	1	4	0	0	0	0	1	1	3	2	0	0	1	1
0	2	1	4	3	1	2	5	2	0	2	1	0	0	0	0	1	2	2	0	1	1	1
0	2	2	4	4	1	3	1	3	0	2	0	0	0	0	0	1	2	2	0	0	2	2
0	2	1	5	5	1	2	5	1	1	3	0	0	0	0	0	1	2	2	1	0	2	1
0	2	1	5	5	3	3	1	1	1	2	0	0	0	0	2	1	2	1	0	0	3	1
0	2	1	3	4	3	1	3	4	1	4	0	0	0	0	0	1	2	2	0	0	1	1
0	2	1	5	5	3	3	7	3	3	3	1	0	0	0	0	1	2	2	1	0	1	1
0	2	1	5	6	3	4	5	1	0	4	0	0	0	0	0	1	3	1	0	0	3	1
0	2	1	5	5	1	4	5	1	0	1	1	0	0	0	0	1	2	2	1	0	3	1
0	2	1	4	4	3	3	5	1	1	2	0	0	0	0	0	1	2	2	1	0	1	1
0	2	1	4	4	1	2	1	1	1	1	0	0	0	0	0	1	2	2	0	0	1	1
0	2	1	4	6	4	4	5	2	0	2	0	0	0	0	2	1	2	2	0	0	1	1
0	2	1	5	4	1	1	4	2	2	1	1	0	0	0	0	1	2	2	1	0	2	1
0	2	1	5	4	1	3	4	1	1	2	1	0	0	0	0	1	2	1	0	0	2	2
0	2	1	5	3	1	3	5	1	2	2	0	0	0	0	0	1	3	2	0	0	1	1
0	2	1	5	5	3	2	5	1	1	2	0	0	0	0	0	1	3	1	0	0	2	1
0	2	1	5	4	1	1	6	3	2	2	0	0	0	0	1	1	2	2	0	0	3	1
0	2	1	5	4	1	3	5	2	1	1	0	1	0	0	0	1	2	2	1	0	3	1
0	2	1	5	4	1	3	5	4	3	0	0	0	0	0	0	1	2	2	0	0	2	1
0	2	1	5	5	3	3	7	2	0	1	0	1	0	0	0	1	2	1	0	0	3	1
0	2	1	4	4	1	2	6	1	1	1	0	0	0	0	0	1	2	1	0	0	3	1
0	2	1	4	3	1	3	5	1	3	3	0	0	0	0	0	1	2	1	1	0	1	1
0	2	1	5	5	1	2	5	1	0	1	0	0	0	0	0	1	2	2	0	1	2	1
0	3	1	6	5	1	3	5	2	0	2	1	1	0	0	0	1	2	2	0	0	2	1
0	3	1	4	4	1	3	5	1	2	3	0	0	0	0	0	1	2	2	1	0	1	1
0	3	1	5	4	1	1	5	1	1	4	0	0	0	0	0	1	2	2	0	0	1	1
0	3	1	4	3	1	3	5	1	2	2	0	0	0	0	0	1	3	2	1	1	3	1
0	3	1	5	5	1	3	5	1	2	2	0	0	0	0	0	1	2	1	0	0	3	1
0	3	1	4	3	1	4	5	1	1	2	0	1	0	0	0	0	2	2	1	1	3	1
0	3	1	5	5	3	4	5	1	1	1	0	0	0	0	0	1	2	2	0	0	1	1
0	3	1	6	5	1	3	3	1	1	4	1	1	0	0	0	1	2	2	0	0	2	1
0	3	1	5	4	1	2	7	1	1	3	1	0	0	0	0	1	2	2	0	0	1	1
0	3	1	4	4	1	1	6	2	1	1	0	0	0	0	0	1	2	1	1	0	3	1
0	3	1	4	4	1	1	6	2	1	1	0	0	0	0	0	1	2	2	0	0	3	1
0	3	1	4	4	1	2	3	1	1	3	0	0	0	0	0	1	3	2	1	0	3	1
0	3	1	5	4	1	3	5	2	1	2	1	0	0	0	0	1	2	2	0	0	1	1
0	3	1	5	5	3	2	5	1	1	1	0	0	0	0	0	1	2	1	1	0	3	1
0	3	1	4	5	3	4	5	1	0	2	0	0	0	0	0	1	3	2	1	0	1	1
0	3	1	5	4	1	2	5	1	1	2	0	0	0	0	0	1	2	1	0	0	1	1
0	3	1	5	4	1	3	5	1	1	3	0	0	0	0	2	1	2	2	1	0	1	1
0	3	1	5	4	1	4	5	3	2	2	1	1	0	0	0	1	2	1	0	0	1	1
0	3	1	5	4	1	3	5	1	3	3	1	1	0	0	0	1	2	2	0	0	2	1
0	3	1	4	3	1	3	5	3	0	2	0	1	0	0	0	1	2	2	1	1	2	1
0	3	1	4	4	3	3	3	2	0	2	0	0	0	0	0	1	3	2	0	0	2	2
0	3	1	5	4	1	2	5	1	2	1	0	0	0	0	0	1	2	1	0	0	1	1
0	3	1	4	4	1	3	5	4	0	2	1	1	0	0	0	1	2	2	1	0	2	1
0	3	1	5	4	1	3	5	1	3	2	1	1	0	0	4	1	2	1	0	0	2	1
0	3	1	5	3	1	3	3	3	1	2	0	0	0	0	0	1	2	2	1	0	2	1
0	3	1	5	5	3	4	3	1	1	1	0	0	0	0	0	1	2	2	1	0	3	1
0	3	1	4	4	3	1	5	1	1	2	0	0	0	0	0	1	2	2	1	0	3	1
0	3	1	5	5	1	1	5	2	2	3	1	0	0	0	0	1	2	2	0	0	2	1
0	3	1	4	4	1	1	5	1	0	3	0	0	0	0	0	1	2	2	1	0	1	1
0	3	1	5	6	3	1	3	1	1	2	0	0	0	0	0	1	2	1	0	0	1	1
0	3	1	4	4	1	1	5	1	2	2	0	0	0	0	0	1	3	2	1	0	1	1
0	3	1	5	5	3	4	5	1	1	1	0	0	0	0	0	1	2	2	0	0	3	1
0	3	1	4	5	3	1	5	2	1	4	0	0	0	0	3	1	2	1	0	0	1	1
0	1	1	5	4	1	1	3	2	0	2	1	1	0	0	0	1	2	2	0	0	3	1
0	1	1	4	4	3	2	4	1	0	2	1	1	0	0	2	1	2	1	1	0	1	1
0	1	1	5	4	1	4	4	1	1	1	1	1	0	0	0	1	2	1	0	0	3	1
0	1	1	5	4	1	2	1	1	1	1	1	1	0	0	1	1	2	1	0	0	1	1
0	1	1	5	3	1	2	3	1	0	2	1	1	4	0	1	1	3	1	0	0	3	1
0	1	2	5	4	1	1	3	2	0	2	1	1	0	0	3	1	2	1	0	0	2	2
0	1	1	4	5	3	3	4	2	2	2	0	0	2	0	1	1	2	2	0	0	2	1
0	1	1	5	4	1	2	3	1	1	1	0	1	0	0	1	1	2	1	0	0	1	1
0	1	1	5	6	3	3	1	2	1	2	1	1	0	0	1	1	2	1	0	1	1	1
0	1	1	4	4	1	3	4	2	3	2	0	1	0	0	1	1	2	2	0	0	2	2
0	1	1	4	6	4	2	4	1	2	1	1	0	0	0	1	1	2	2	0	1	3	1
0	1	1	5	6	3	2	3	3	1	2	1	1	0	0	3	1	2	2	1	0	3	1
0	1	1	6	6	3	4	1	1	0	2	1	1	0	0	1	1	2	2	1	0	3	1
0	1	1	5	5	3	4	4	2	1	1	0	0	0	0	1	1	3	1	0	0	3	1
0	1	1	5	5	3	1	7	1	4	4	1	1	0	0	4	1	2	1	0	0	1	1
0	1	1	4	5	4	1	6	2	4	3	1	1	0	0	0	1	2	2	0	0	1	1
0	1	1	5	5	3	3	1	2	3	2	0	1	0	0	1	1	2	2	0	1	1	1
0	1	1	5	6	3	3	1	4	0	2	1	1	0	0	1	1	2	2	1	0	2	1
0	1	1	5	6	3	2	6	2	2	1	0	0	0	0	1	1	2	2	0	0	1	2
0	1	1	5	4	1	4	4	1	1	1	0	0	0	0	0	1	2	1	0	0	1	1
0	1	1	5	6	3	2	1	3	0	2	1	1	0	0	1	1	2	1	1	0	1	1
0	1	1	4	4	1	1	4	1	0	4	0	1	0	0	0	1	2	1	0	0	3	1
0	1	1	5	6	3	1	1	2	0	2	0	0	0	0	2	0	2	1	0	0	3	1
0	1	1	5	5	1	3	4	1	1	1	0	1	4	1	1	1	3	1	0	0	1	1
0	1	1	5	4	1	2	4	2	3	3	1	1	4	0	0	1	2	1	1	0	3	1
0	1	1	4	5	3	2	4	3	0	3	0	1	0	0	1	1	2	1	0	0	3	1
0	1	1	5	6	3	2	4	1	0	3	1	1	0	0	1	1	3	1	0	0	3	1
0	1	1	4	4	1	1	3	1	2	1	1	0	0	0	1	1	2	2	0	0	1	1
0	1	1	5	6	3	2	6	1	0	2	0	0	0	0	1	1	2	2	0	0	2	1
0	1	1	4	5	3	3	1	4	0	4	0	1	0	0	1	1	2	2	0	0	1	1
0	1	1	5	4	1	4	1	2	4	2	0	1	0	0	2	1	3	2	0	0	3	1
0	1	1	5	6	4	2	4	2	0	1	1	1	0	0	4	1	2	1	1	0	1	1
0	1	1	5	6	3	3	6	2	2	2	1	1	0	0	1	1	2	1	0	0	1	1
0	1	1	5	7	4	4	4	1	0	2	1	1	0	0	0	1	2	1	0	0	1	2
0	1	1	5	3	1	4	4	2	2	2	1	1	0	0	3	1	3	2	0	0	2	1
0	1	1	5	5	3	3	4	1	4	1	1	1	0	0	4	1	3	2	0	0	3	1
0	1	1	5	6	4	2	4	1	0	3	1	1	3	0	3	1	2	1	1	0	2	1
0	1	1	4	6	4	2	4	2	0	2	1	1	0	0	3	1	2	1	0	0	1	1
0	1	1	4	4	1	1	4	4	0	4	1	1	0	0	0	1	2	1	1	0	1	1
0	1	1	5	6	3	2	4	1	2	2	1	1	0	0	0	1	3	1	0	0	1	1
0	1	1	5	5	1	2	4	1	4	4	1	1	0	0	1	1	2	1	0	0	3	1
0	1	1	5	5	3	2	1	2	2	3	1	1	0	0	1	1	2	1	0	0	3	1
0	1	1	4	5	3	3	4	3	0	2	0	1	0	0	3	1	2	1	0	0	3	1
0	1	2	5	6	3	4	7	2	2	2	1	1	2	2	2	1	3	2	1	0	1	1
0	1	1	5	6	4	3	4	2	1	1	1	0	0	0	1	1	2	1	0	0	2	1
0	1	1	4	4	1	2	7	1	0	2	1	1	0	0	1	1	2	1	0	0	1	1
0	1	1	5	5	1	2	4	1	2	2	1	0	3	0	1	1	2	1	0	0	1	1
0	1	1	4	4	1	2	3	1	0	3	1	0	0	0	3	1	2	2	0	0	1	1
0	1	1	4	5	3	2	4	1	1	2	0	0	0	0	2	1	2	2	0	0	1	1
0	1	1	5	7	4	3	4	1	0	4	0	0	0	0	1	1	2	2	0	0	1	1
0	1	1	4	5	3	2	4	1	3	2	0	0	0	0	0	1	3	2	0	0	2	1
0	1	1	5	4	1	3	4	1	0	2	0	0	0	0	0	1	2	1	0	0	1	1
0	1	1	4	4	3	3	1	1	4	4	0	1	0	0	1	1	3	2	1	0	1	1
0	1	1	4	4	1	2	1	1	4	3	0	0	0	0	1	1	2	2	0	0	1	1
0	1	1	5	6	3	1	7	1	3	3	0	1	4	0	0	1	2	1	1	0	3	1
0	1	1	6	5	1	2	4	1	1	1	1	1	0	4	1	1	3	1	1	0	1	2
0	1	1	5	5	1	3	4	2	3	2	1	1	0	0	3	1	2	1	0	0	2	1
0	1	1	5	5	3	2	1	4	4	2	1	1	0	0	0	1	2	2	0	1	1	1
0	1	1	5	5	1	3	1	2	2	2	1	1	2	0	1	1	3	1	0	0	2	1
0	1	1	5	5	1	3	4	1	1	3	1	1	0	0	3	1	2	2	0	0	2	1
0	1	1	5	5	3	2	4	3	0	2	1	1	0	0	1	1	2	2	1	0	3	1
0	1	1	5	5	3	3	1	3	4	3	1	1	0	0	2	1	2	2	0	0	2	1
0	1	1	4	4	1	3	1	2	2	2	1	1	0	0	1	1	3	2	0	0	3	1
0	1	1	6	5	1	3	4	3	2	1	1	1	0	0	1	1	2	1	0	0	2	1
0	1	1	5	4	1	3	4	2	3	4	1	1	4	0	1	1	2	1	0	0	2	1
0	1	1	5	5	1	4	4	1	2	1	0	1	0	0	1	1	2	1	1	0	2	2
0	1	1	4	5	3	3	3	1	0	2	0	1	0	0	1	1	2	1	0	0	1	1
0	1	2	5	6	3	4	1	1	0	2	1	1	0	0	0	1	2	1	0	1	2	1
0	1	1	4	5	3	2	1	1	2	2	1	1	3	3	0	1	2	1	0	0	1	1
0	1	1	4	3	1	2	4	2	2	2	1	1	4	0	4	1	2	1	0	0	1	1
0	1	1	5	4	1	2	1	2	2	3	1	1	0	0	0	1	2	1	1	0	1	1
0	1	1	5	5	1	3	4	2	4	2	1	1	0	0	0	1	2	1	0	0	1	1
0	1	1	4	5	3	3	4	1	1	1	1	1	0	0	0	1	3	1	0	0	2	2
0	1	1	5	5	3	3	1	1	0	3	1	1	0	0	1	1	2	1	0	0	2	1
0	1	1	4	4	1	2	7	1	0	2	1	1	2	0	1	1	2	2	0	0	1	1
0	1	1	5	4	1	1	4	1	3	1	1	1	0	0	1	1	2	2	0	0	1	2
0	1	1	5	5	3	2	1	1	4	1	1	1	0	0	1	1	3	2	0	0	1	1
0	1	1	5	4	1	2	4	1	4	2	1	1	4	0	1	1	2	1	0	0	1	1
0	1	1	5	6	3	3	4	1	0	1	0	1	0	0	4	1	3	1	0	0	1	1
0	1	1	4	5	3	2	4	1	0	2	0	1	0	0	2	1	2	2	1	0	1	1
0	1	1	4	5	4	4	1	4	4	1	0	1	3	3	1	1	2	1	0	0	1	1
0	1	1	4	4	1	1	1	1	2	3	0	1	0	0	1	1	2	1	0	0	1	1
0	1	1	3	4	3	2	4	1	3	2	0	1	0	0	1	1	2	1	0	0	3	1
0	1	1	5	5	3	3	4	1	0	1	1	0	0	0	1	1	2	1	0	0	2	1
0	1	1	4	3	1	3	1	1	0	2	1	1	3	4	2	1	2	1	1	0	2	1
0	1	1	5	7	4	3	1	2	0	2	1	0	0	0	1	1	2	1	0	0	1	1
0	1	1	5	6	3	2	4	3	2	1	1	1	0	0	0	1	2	1	0	0	1	2
0	1	1	3	2	1	2	4	1	0	2	1	0	0	0	1	0	2	1	0	0	1	1
0	1	1	4	5	3	2	4	1	0	1	1	0	2	0	1	1	2	2	0	0	1	1
0	1	1	6	7	3	3	3	2	0	3	1	0	0	0	1	1	2	2	0	0	2	1
0	1	1	6	6	3	3	4	2	2	1	0	0	0	0	3	1	3	1	0	0	1	2
0	1	1	5	6	3	2	4	1	0	1	0	0	0	0	1	1	2	1	0	0	2	1
0	1	2	4	4	3	3	3	2	0	3	0	0	4	0	1	1	2	2	0	0	2	2
0	1	1	5	4	1	3	1	2	0	2	0	1	4	0	0	1	2	1	1	0	2	1
0	1	1	5	5	3	2	7	1	4	2	0	0	4	0	2	1	3	1	0	0	1	1
0	1	1	5	6	3	3	3	1	1	1	0	0	0	0	0	1	3	1	0	0	1	1
0	1	1	3	4	3	1	1	1	3	3	0	0	0	0	1	1	2	2	0	0	1	1
0	1	1	5	4	1	2	3	4	0	4	0	1	4	4	0	1	2	2	0	0	1	1
0	1	1	4	4	1	1	1	1	4	2	0	1	0	0	1	0	2	1	0	0	1	1
0	1	1	5	4	1	2	4	2	2	1	0	0	4	0	1	1	2	1	0	0	1	1
0	1	1	5	4	1	3	1	1	3	2	0	1	0	0	1	1	2	1	1	0	1	1
0	1	1	5	4	1	2	4	2	3	2	0	0	4	0	1	1	2	2	0	0	3	1
0	1	1	5	5	3	3	4	1	0	4	1	1	0	0	1	1	2	1	0	0	2	1
0	1	1	5	5	3	2	4	1	0	1	1	1	0	0	0	1	2	1	0	0	1	1
0	1	1	5	5	3	3	4	1	1	2	0	1	3	0	1	1	2	1	1	0	3	1
0	1	1	5	4	1	3	4	1	0	2	1	1	0	0	0	1	2	1	0	0	2	2
0	1	2	4	4	1	3	3	1	0	4	1	1	0	0	1	1	2	1	0	0	2	2
0	1	1	5	5	3	3	1	1	0	3	1	1	0	0	1	1	2	1	1	1	2	1
0	1	1	5	4	1	3	4	1	0	2	1	1	0	0	0	1	2	2	0	0	2	1
0	1	1	5	5	1	1	4	1	3	2	1	1	0	0	1	1	3	1	0	0	1	1
0	1	1	5	4	1	2	3	1	4	4	1	1	0	0	1	1	2	1	0	0	1	1
0	1	1	5	4	1	2	4	1	2	2	1	1	0	0	1	1	3	2	0	0	1	1
0	1	1	5	5	3	2	4	3	2	3	1	1	2	3	2	1	2	2	1	0	3	2
0	1	1	5	5	1	1	3	2	3	2	1	1	0	0	2	1	2	2	0	0	3	2
0	1	1	5	4	1	3	3	4	0	2	1	1	0	0	0	1	2	2	0	0	2	1
0	1	1	4	3	1	3	1	1	1	2	1	1	0	3	1	1	2	1	0	0	1	1
0	1	1	5	6	3	2	4	3	2	3	1	1	0	0	0	1	2	1	0	0	3	1
0	1	1	5	5	3	2	4	2	0	1	1	1	0	0	0	1	2	1	1	0	2	1
0	1	1	5	6	3	3	4	1	1	1	1	1	0	0	0	1	2	1	0	0	1	1
0	1	1	5	5	3	3	4	1	0	1	1	1	0	0	3	1	2	1	0	0	2	1
0	1	1	3	5	3	3	4	1	3	4	1	1	0	0	1	1	2	1	0	0	3	1
0	1	1	5	4	1	1	3	2	2	2	0	1	0	0	1	1	3	1	0	0	1	1
0	1	1	4	5	3	4	4	1	0	1	0	1	0	0	1	1	2	1	1	0	1	1
0	1	1	4	4	3	2	1	1	3	3	0	1	4	0	1	1	3	2	1	0	3	1
0	1	1	5	5	3	3	1	2	0	2	1	1	0	0	2	1	2	1	0	0	3	1
0	1	1	5	5	1	2	6	1	0	1	1	1	0	0	1	1	2	1	0	0	1	2
0	1	1	5	6	3	3	4	2	0	2	1	1	4	0	0	1	2	2	0	0	2	1
0	1	1	5	4	1	2	4	1	0	1	1	1	0	0	0	1	2	2	1	0	1	1
0	1	1	5	4	1	4	1	1	0	2	1	1	0	0	1	1	3	2	0	0	1	1
0	1	1	4	4	1	2	3	1	1	1	1	1	0	0	0	1	2	2	0	0	1	1
0	1	1	5	4	1	2	4	1	1	1	1	1	0	0	1	1	2	1	0	0	1	1
0	1	1	5	4	1	2	7	1	0	2	1	1	3	0	1	1	2	1	0	0	3	1
0	1	1	5	4	1	3	6	1	0	2	1	1	0	0	1	1	2	2	1	0	2	1
0	1	1	4	3	2	3	4	1	0	3	1	1	0	0	1	1	2	1	0	0	2	1
0	1	1	4	6	4	4	7	1	0	3	1	1	0	0	3	1	2	1	0	0	1	1
0	1	1	4	4	1	1	4	1	0	2	1	1	0	0	1	1	2	1	0	0	1	1
0	1	1	5	6	3	2	4	2	0	2	0	1	0	0	0	1	2	1	0	0	2	1
0	1	2	5	6	3	2	3	1	3	3	0	1	3	0	0	1	2	1	1	0	2	2
0	1	1	5	6	3	3	4	2	1	1	0	1	0	0	1	1	2	1	0	0	2	1
0	1	1	5	5	3	1	1	1	0	4	0	1	0	0	0	1	2	1	0	0	1	1
0	1	1	5	5	3	2	4	1	0	2	0	1	0	0	1	1	2	1	0	0	1	1
0	1	1	5	5	3	1	4	1	3	2	0	1	0	0	3	1	2	2	0	0	1	1
0	1	1	5	4	1	2	1	1	0	3	1	1	0	0	1	1	2	2	1	0	1	1
0	1	1	4	4	1	3	4	1	4	1	1	1	0	0	1	1	2	2	0	0	1	1
0	1	1	5	5	1	1	3	2	0	2	1	1	0	0	1	1	2	2	0	0	1	1
0	1	1	4	5	3	3	1	1	2	1	1	1	0	0	1	1	2	1	0	0	1	1
0	1	1	4	4	1	3	4	2	0	2	1	1	0	0	1	1	2	1	0	0	2	1
0	1	1	5	7	4	3	1	2	0	3	1	1	4	0	1	1	3	1	1	0	2	1
0	1	1	5	4	1	3	4	1	0	2	1	1	0	0	1	1	2	1	0	0	2	1
0	1	1	5	6	3	3	4	2	0	2	1	1	2	0	2	1	2	1	0	0	2	1
0	1	1	5	4	1	3	4	1	0	3	1	1	4	0	1	1	3	1	0	0	2	1
0	1	1	4	4	1	2	4	3	4	2	1	1	0	0	2	1	2	1	0	0	1	1
0	1	1	5	5	3	2	4	1	0	2	1	1	0	0	1	1	2	1	1	0	1	1
0	1	1	5	3	1	2	1	1	0	0	1	1	0	0	1	1	2	1	0	0	1	1
0	1	1	4	5	3	2	4	1	0	1	1	1	0	0	1	1	2	1	0	0	3	1
0	1	1	4	5	3	2	4	2	3	3	1	1	0	0	3	1	2	1	0	0	3	1
0	1	1	4	4	3	2	4	1	4	3	1	1	4	4	1	1	3	2	0	0	3	1
0	1	1	5	4	1	2	4	1	1	3	1	1	0	0	1	1	2	2	1	0	1	1
0	1	1	5	4	1	2	7	1	0	3	1	1	0	0	2	1	3	2	0	0	2	1
0	1	1	5	4	1	3	4	1	3	2	1	1	0	0	2	1	2	2	0	0	2	1
0	1	1	5	5	1	4	3	1	1	1	1	1	0	0	1	1	2	1	0	0	1	1
0	1	1	5	5	3	4	1	1	0	2	1	1	3	0	1	1	2	1	0	0	1	1
0	1	1	4	4	1	2	4	2	0	3	1	1	0	0	1	1	2	1	1	0	1	1
0	1	1	4	3	2	2	4	2	0	2	1	1	0	0	1	1	2	1	0	0	3	1
0	1	1	5	5	3	2	4	1	0	2	1	1	0	0	0	1	2	1	0	0	1	1
0	1	1	5	6	3	1	6	2	3	2	1	1	4	0	0	1	2	1	0	0	1	1
0	1	1	4	5	3	1	4	2	0	2	1	1	0	0	3	1	3	1	0	0	1	1
0	1	1	5	5	3	2	7	4	3	1	1	1	0	0	3	1	2	1	1	0	1	1
0	1	1	5	4	1	2	4	1	0	0	1	1	0	0	0	1	2	1	0	0	2	1
0	1	1	4	3	1	3	3	2	2	1	1	1	4	0	4	1	2	1	0	0	2	1
0	1	1	5	5	1	1	4	1	2	4	1	1	0	0	1	1	3	1	0	0	1	1
0	1	1	4	4	1	3	3	1	0	2	1	1	0	0	1	1	2	2	0	0	2	2
0	1	1	4	4	1	3	4	1	0	2	1	1	0	0	1	1	2	2	1	0	2	1
0	1	1	5	4	1	3	1	2	0	2	1	1	0	0	1	1	2	2	0	0	2	1
0	1	1	4	4	1	3	4	1	0	2	1	1	0	0	1	1	2	2	0	0	2	1
0	1	1	4	4	1	3	4	2	4	2	1	1	0	0	1	1	3	1	0	0	2	1
0	1	1	5	4	1	3	1	2	2	2	1	1	2	0	1	1	2	1	0	0	2	1
0	1	1	5	4	1	3	4	1	0	3	1	1	0	0	1	1	2	1	1	0	2	1
0	1	1	5	4	1	3	4	1	0	2	1	1	0	0	1	1	2	1	0	0	1	1
0	1	1	5	5	3	2	7	1	1	3	1	1	3	0	1	1	2	1	0	0	1	1
0	1	1	4	4	1	2	4	1	0	3	1	1	4	4	1	1	3	1	0	0	1	1
0	1	1	4	4	1	2	4	1	2	2	1	1	1	0	1	1	2	1	0	0	1	1
0	1	1	4	4	1	1	1	1	0	3	1	1	0	0	1	1	2	1	1	0	1	1
0	1	1	5	4	1	2	1	1	2	4	1	1	0	0	1	1	2	1	0	0	1	1
0	1	1	5	3	1	2	1	1	0	2	1	1	0	0	1	1	3	1	1	0	1	1
0	1	1	5	4	1	2	7	1	2	2	1	1	2	0	2	1	2	1	0	0	1	1
0	1	1	5	5	3	2	3	3	3	3	1	1	2	3	3	1	3	2	0	0	3	2
0	1	1	5	4	1	3	4	1	2	1	1	1	0	0	2	1	2	2	1	0	3	1
0	1	1	3	3	1	3	4	1	3	3	1	1	4	0	0	1	2	2	0	0	3	1
0	1	1	5	4	1	2	4	4	1	4	1	1	0	0	1	1	2	2	0	0	3	1
0	1	1	4	3	2	3	4	2	3	3	1	1	0	0	3	1	2	1	0	0	3	1
0	1	1	4	4	1	2	4	1	3	2	1	1	0	0	1	1	2	1	0	0	3	1
0	1	1	4	5	3	2	3	1	2	2	1	1	0	0	1	1	2	1	1	0	3	1
0	1	1	5	5	3	2	6	1	2	2	1	1	0	0	1	1	2	1	0	0	3	1
0	1	1	5	5	3	1	6	1	0	2	1	1	0	0	0	1	3	1	0	0	3	1
0	1	1	5	6	3	3	1	1	1	1	1	1	0	0	1	1	2	1	0	0	1	1
0	1	1	3	4	3	2	4	2	0	2	1	1	0	0	1	1	2	1	1	0	1	2
0	1	1	4	5	3	1	4	1	0	2	1	1	0	0	0	1	2	1	0	0	1	2
0	1	1	3	4	3	2	4	1	0	3	1	1	0	0	1	1	2	2	1	0	2	1
0	1	1	5	3	1	2	4	1	0	3	1	1	0	0	1	1	2	1	0	1	2	1
0	1	1	4	3	1	2	4	2	2	2	1	1	0	0	2	1	3	2	0	0	2	1
0	1	1	5	5	3	3	4	1	0	1	1	1	0	0	1	1	2	2	1	0	2	1
0	1	1	4	4	1	3	4	2	0	2	1	1	0	0	0	1	2	2	0	0	2	1
0	1	1	6	5	1	3	1	1	2	2	1	1	1	2	2	1	2	2	0	0	1	1
0	1	2	4	3	1	3	3	2	0	4	1	1	0	0	3	1	2	1	0	0	2	2
0	1	2	4	3	1	3	4	3	0	2	1	1	0	0	1	1	2	1	0	0	2	2
0	1	1	5	5	3	3	1	2	2	4	1	1	0	0	1	1	2	1	1	0	2	1
0	1	1	5	6	3	3	4	2	0	2	1	1	4	0	0	1	2	1	0	0	2	1
0	1	1	5	4	1	3	1	2	3	2	1	1	0	0	2	1	2	1	0	0	2	1
0	1	1	5	4	1	3	4	2	0	2	1	1	2	0	2	1	2	1	0	0	2	1
0	1	1	5	5	1	3	4	1	3	2	1	1	3	0	1	1	2	1	0	0	2	1
0	1	1	5	4	1	3	4	2	2	2	1	1	2	0	1	1	2	1	1	0	2	1
0	1	1	5	4	1	3	4	1	3	2	1	1	4	4	4	1	2	1	0	0	2	1
0	1	1	5	4	1	3	4	1	0	4	1	1	0	0	2	1	2	1	0	0	2	1
0	1	1	5	4	1	2	4	1	3	1	1	1	3	0	1	1	2	1	0	0	1	1
0	1	1	5	5	1	2	1	1	1	1	1	1	0	0	1	1	3	2	0	0	1	1
0	1	1	5	4	1	2	4	1	0	2	1	1	0	0	1	1	2	2	1	0	1	1
0	1	1	4	5	3	3	4	1	0	3	1	1	0	0	1	0	2	2	0	0	1	1
0	1	1	4	3	1	1	7	1	2	2	1	1	0	0	1	1	2	2	0	0	1	1
0	1	1	4	5	3	2	7	1	0	2	1	1	0	0	1	1	2	1	0	0	1	1
0	1	1	5	5	3	2	6	1	3	1	1	1	0	0	1	1	3	1	0	0	1	1
0	1	1	4	5	3	2	4	3	0	3	1	1	4	0	1	1	2	1	1	0	1	1
0	1	1	4	4	3	2	4	1	0	3	1	1	0	0	1	1	2	1	0	0	1	1
0	1	1	5	4	1	2	7	1	1	1	1	1	0	0	1	1	2	1	0	0	1	1
0	1	1	5	6	3	2	6	1	0	3	1	1	3	0	1	1	2	1	0	0	3	1
0	1	1	5	5	3	2	1	1	0	4	1	1	0	0	1	1	2	1	0	0	3	1
0	1	1	5	5	3	2	4	2	3	3	1	1	0	0	3	1	2	1	1	0	3	1
0	1	1	4	4	1	2	3	1	1	2	1	1	0	0	1	1	2	1	0	0	3	1
0	1	1	4	3	2	1	4	1	1	2	1	1	3	0	0	1	2	1	0	0	3	1
0	1	1	4	4	1	2	4	2	2	2	1	1	0	0	0	1	3	1	0	0	3	1
0	1	1	4	4	1	2	4	1	0	2	1	1	0	0	1	1	3	2	0	0	3	1
0	1	1	5	4	1	2	4	3	0	2	1	1	0	0	0	1	2	2	1	0	3	1
0	1	1	4	4	1	2	4	2	4	4	1	1	0	0	4	1	1	2	0	1	3	1
0	1	1	5	5	3	2	4	1	2	4	1	1	0	0	1	1	3	2	0	0	3	1
0	1	1	4	4	1	2	4	2	4	4	1	1	0	0	4	1	2	1	0	1	3	1
0	1	1	5	5	3	2	5	1	2	2	1	1	3	0	1	1	3	1	0	0	2	1
0	1	1	5	5	3	2	4	2	3	2	1	1	0	0	1	1	2	1	1	0	1	1
0	1	1	5	6	3	1	6	1	2	2	1	1	0	0	1	1	3	1	0	0	1	2
0	1	1	5	6	3	2	4	2	2	2	1	1	0	0	2	1	2	1	0	0	1	1
0	1	1	5	5	1	2	4	1	0	1	1	1	0	0	0	1	3	1	0	0	2	2
0	1	1	4	4	1	2	1	3	0	1	1	1	2	0	4	1	2	1	0	0	1	1
0	1	1	4	4	1	3	4	2	3	2	1	1	0	0	0	1	2	1	1	0	2	1
0	1	1	5	5	3	4	4	1	0	1	1	1	0	0	1	1	2	1	0	0	1	1
0	1	1	5	4	1	2	7	1	3	3	1	1	3	0	1	1	2	1	0	0	1	1
0	1	1	5	4	1	2	4	1	0	2	1	1	0	0	4	1	2	1	0	0	1	1
0	1	1	6	4	1	2	4	1	0	2	1	1	4	0	0	1	3	2	0	0	1	1
0	1	1	5	5	3	3	4	3	0	3	1	1	0	0	0	1	2	2	1	0	1	1
0	1	1	4	5	3	4	1	1	4	1	1	1	0	0	1	1	2	2	0	0	1	1
0	1	1	5	5	1	2	4	2	3	3	1	1	0	0	2	1	2	2	0	0	3	2
0	1	1	5	5	3	2	3	1	2	2	1	1	0	0	1	1	2	1	0	0	3	1
0	1	1	5	5	3	2	4	3	2	3	1	1	0	0	0	1	2	1	0	0	3	1
0	1	1	4	4	1	2	4	2	0	2	1	1	0	0	2	1	3	1	1	0	3	1
0	1	1	4	3	1	2	7	1	1	2	1	1	0	0	1	1	3	1	0	0	3	1
0	1	1	5	6	3	2	4	2	2	2	1	1	0	0	1	1	2	1	0	0	3	1
0	1	1	5	4	1	3	4	3	0	1	1	1	0	0	0	1	2	1	0	0	3	1
0	1	1	5	6	4	2	1	2	0	2	0	1	3	0	1	1	2	1	0	0	1	1
0	1	1	5	5	1	2	4	3	0	3	0	1	3	0	0	1	2	1	1	0	2	1
0	1	1	6	5	1	2	4	1	0	1	0	1	0	0	1	1	2	1	0	0	2	1
0	1	1	5	4	1	3	4	1	3	4	0	1	0	0	1	1	2	1	0	0	1	1
0	1	1	5	5	1	2	1	1	4	3	0	1	4	0	4	1	2	1	0	0	1	1
0	1	1	4	3	1	3	1	1	0	4	0	1	4	0	0	1	2	2	0	0	2	1
0	1	1	5	6	3	3	1	3	1	1	0	1	0	0	3	1	2	2	1	0	2	1
0	1	1	4	3	1	3	3	2	2	2	0	1	0	0	1	1	2	2	0	0	2	1
0	1	1	5	4	1	3	1	2	0	4	0	1	0	0	4	1	2	2	0	0	2	1
0	1	1	5	6	3	3	1	2	0	2	0	1	0	0	2	1	2	1	0	0	2	1
0	1	1	5	3	1	3	4	2	0	2	0	1	0	0	2	1	2	1	0	0	2	1
0	1	1	6	5	1	3	1	2	2	2	0	1	2	0	0	1	2	1	1	0	2	1
0	1	1	4	5	3	4	4	1	2	2	0	1	0	0	1	0	3	1	0	0	1	1
0	1	1	4	2	2	2	4	1	1	1	0	1	0	0	1	1	3	1	0	0	1	1
0	1	1	4	4	1	2	4	1	0	2	0	1	0	0	2	1	3	1	0	0	1	1
0	1	1	5	5	3	3	4	3	3	2	0	1	0	0	1	1	2	1	1	0	1	1
0	1	1	5	5	1	2	1	1	3	2	0	1	0	0	1	1	2	2	0	0	1	1
0	1	1	5	5	3	1	4	3	4	4	0	1	0	0	2	1	2	1	0	0	1	1
0	1	1	4	4	1	1	4	1	1	1	0	1	0	0	1	1	2	1	0	0	1	1
0	1	1	5	4	1	3	4	1	0	2	0	1	0	0	1	1	2	2	0	0	1	1
0	1	1	5	5	1	2	4	1	0	2	0	1	4	0	1	1	3	2	1	0	1	1
0	1	1	3	5	4	3	6	1	1	1	0	1	4	0	2	1	2	2	0	0	3	1
0	1	1	5	4	1	2	4	2	2	3	0	1	0	0	1	1	2	2	0	0	3	1
0	1	1	6	7	3	2	4	1	0	2	0	1	0	0	1	1	3	1	0	0	3	1
0	1	1	4	4	1	2	7	3	0	2	0	1	0	0	0	1	3	1	0	0	3	1
0	1	1	4	5	3	2	4	2	0	2	1	1	0	0	2	1	2	1	1	0	1	1
0	1	1	4	5	3	2	1	1	3	3	1	1	2	0	1	1	2	1	0	0	1	1
0	1	1	6	5	1	2	4	1	0	1	1	1	0	0	1	1	2	2	0	0	3	1
0	1	1	6	6	3	3	1	1	0	4	1	1	0	0	0	1	2	1	0	0	1	1
0	1	1	4	5	4	2	4	1	0	2	1	1	4	0	0	1	3	1	0	0	1	1
0	1	1	5	4	1	2	4	2	0	4	1	1	0	0	1	1	2	1	1	0	1	1
0	1	1	5	5	3	1	4	1	2	2	1	1	0	0	1	1	2	1	0	0	1	1
0	1	1	5	3	1	2	4	1	3	2	1	1	4	0	1	1	2	1	0	0	1	1
0	1	1	5	6	3	2	1	1	4	3	1	1	4	4	4	1	2	1	0	0	1	1
0	1	1	6	5	1	3	4	3	3	2	1	1	0	0	2	1	2	2	0	0	2	1
0	1	1	5	4	1	4	1	2	1	1	1	1	0	0	1	1	2	2	1	0	1	1
0	1	1	5	4	1	3	4	1	0	2	1	1	0	0	1	1	2	2	0	0	2	1
0	1	1	5	5	1	3	1	1	4	4	1	1	0	0	0	1	2	2	0	0	1	1
0	1	1	4	4	1	3	1	1	0	3	1	1	4	4	1	1	2	2	0	0	1	1
0	1	1	4	4	1	4	1	1	0	1	1	1	0	0	1	1	2	1	0	0	3	1
0	1	1	5	4	1	1	1	2	2	2	1	1	0	0	1	1	2	1	1	0	3	1
0	1	1	5	4	1	1	4	2	0	1	1	1	0	0	1	1	2	2	0	0	3	1
0	1	1	5	7	4	1	4	1	0	2	1	1	0	0	1	1	2	1	0	0	1	1
0	1	1	6	7	3	3	4	1	0	1	1	1	0	0	1	1	3	1	0	0	1	1
0	1	1	4	5	3	2	3	2	0	2	1	1	0	0	0	1	3	1	1	0	1	1
0	1	1	5	6	3	3	4	1	0	3	1	1	0	3	0	1	2	1	1	0	2	1
0	1	1	5	4	1	1	3	1	1	1	1	1	0	0	1	1	2	1	1	0	2	1
0	1	1	5	4	1	3	4	4	0	2	1	1	0	0	0	1	2	1	0	0	2	1
0	1	1	5	4	1	1	1	3	2	2	1	1	0	0	1	1	2	1	0	0	2	1
0	1	1	4	4	3	3	4	2	2	2	1	1	4	0	0	1	2	2	0	0	2	1
0	1	1	5	4	1	3	4	1	0	1	1	1	0	0	0	1	2	2	1	0	2	1
0	1	1	5	5	1	2	4	2	1	2	1	1	0	0	2	1	2	2	0	0	2	1
0	1	1	4	4	1	2	4	3	2	2	1	1	0	0	1	1	2	2	0	0	2	1
0	1	1	5	5	1	2	1	1	0	2	1	1	0	0	1	1	2	1	0	0	1	1
0	1	1	5	5	3	2	4	3	2	3	1	1	0	0	1	1	3	1	0	0	1	1
0	1	1	4	5	3	2	4	1	4	4	1	1	4	4	4	1	2	1	1	0	1	1
0	1	1	5	4	1	2	4	1	2	1	1	1	0	0	1	1	3	2	0	1	1	1
0	1	1	5	4	1	3	4	1	0	2	1	1	0	0	0	1	2	1	0	0	2	2
0	1	1	4	4	1	3	1	2	3	1	1	1	3	3	2	1	2	1	0	0	2	1
0	1	1	5	4	1	3	4	2	0	2	1	1	0	0	1	1	2	1	0	0	2	1
0	1	1	5	5	3	3	4	4	0	3	1	1	0	0	0	1	2	1	1	0	2	1
0	1	1	4	4	1	3	4	3	0	0	1	1	1	3	0	1	2	2	0	0	2	1
0	1	1	4	5	3	3	4	3	0	2	1	1	0	0	1	1	2	1	0	0	2	1
0	1	1	4	4	1	3	6	2	0	2	1	1	0	0	0	1	2	1	0	0	2	1
0	1	1	4	7	4	3	7	2	0	2	1	1	0	0	2	1	2	2	0	0	2	1
0	1	1	4	5	3	3	4	1	0	2	1	1	2	0	2	1	2	2	1	0	2	1
0	1	1	5	4	1	3	1	2	2	2	1	1	0	0	2	1	2	2	0	0	2	1
0	1	1	5	5	3	3	1	1	0	2	1	1	0	0	1	1	2	2	0	0	2	1
0	1	1	5	4	1	3	1	1	2	3	1	1	3	3	0	1	2	1	0	0	2	1
0	1	1	5	5	1	3	4	3	4	2	1	1	0	0	1	1	3	1	0	0	2	1
0	1	1	5	4	1	3	4	3	0	2	1	1	0	0	1	1	2	1	1	0	2	1
0	1	1	5	5	3	3	4	2	4	2	1	1	4	1	3	1	2	1	0	0	2	1
0	1	1	5	5	3	3	4	1	4	2	1	1	4	0	3	1	2	1	0	0	2	1
0	1	1	4	5	3	3	4	4	3	3	1	1	1	2	3	1	2	1	0	0	2	1
0	1	1	4	5	3	3	4	2	0	2	1	1	0	0	1	1	2	1	0	0	2	1
0	1	1	5	4	1	3	4	2	0	2	1	1	4	0	1	1	2	1	1	1	2	1
0	1	1	5	4	1	3	1	2	3	2	1	1	0	0	1	1	3	1	0	0	2	1
0	1	1	5	4	1	3	4	2	0	2	1	1	0	0	1	1	2	1	0	0	2	1
0	1	2	4	5	3	3	4	3	0	3	1	1	0	0	1	1	2	1	0	0	2	1
0	1	1	5	5	1	1	1	1	4	2	1	1	0	0	1	1	3	2	0	0	1	1
0	1	1	4	4	1	2	1	1	0	4	1	1	0	0	1	1	2	2	1	0	1	1
0	1	1	5	4	1	2	4	4	3	4	1	1	4	3	3	1	2	2	0	0	1	1
0	1	1	5	6	3	3	1	3	4	4	1	1	4	4	1	1	2	2	0	0	1	1
0	1	1	5	4	1	1	3	1	3	4	1	1	0	0	1	1	3	1	0	0	1	1
0	1	1	4	5	3	3	4	1	0	2	1	1	0	0	1	1	2	1	0	0	1	1
0	1	1	5	4	1	3	1	3	0	1	1	1	0	0	0	1	2	1	1	0	1	1
0	1	1	5	5	3	3	4	4	0	3	1	1	0	1	1	1	2	1	0	0	1	1
0	1	1	5	4	1	3	4	4	3	4	1	1	0	0	3	1	2	1	0	0	1	1
0	1	1	5	4	1	2	4	4	3	4	1	1	3	0	3	1	2	1	0	0	1	1
0	1	1	5	4	1	2	1	3	3	4	1	1	3	0	2	1	2	1	0	0	1	1
0	1	1	4	4	1	3	4	3	4	4	1	1	4	0	2	1	2	2	1	0	1	1
0	1	1	5	4	1	2	3	1	0	0	1	1	0	0	1	1	2	1	0	0	1	1
0	1	1	4	5	3	3	7	1	0	3	1	1	0	0	1	1	2	1	0	0	1	1
0	1	1	5	5	3	2	1	3	0	3	1	1	4	0	1	1	2	1	0	0	1	1
0	1	1	5	4	1	2	4	1	3	3	1	1	4	0	0	1	2	2	0	0	1	1
0	1	1	5	4	1	2	1	1	1	3	1	1	4	4	4	1	2	2	1	0	1	1
0	1	1	4	5	4	2	4	1	2	2	1	1	4	0	1	1	2	2	0	0	1	1
0	1	1	5	4	1	1	4	1	0	4	1	1	0	0	0	1	2	2	0	0	1	1
0	1	1	4	5	3	3	1	1	4	1	1	1	0	0	1	1	2	1	0	0	1	1
0	1	1	5	4	1	2	3	1	3	3	1	1	3	0	0	1	2	1	0	0	1	1
0	1	1	5	5	3	2	6	3	2	3	1	1	0	0	2	1	2	1	1	0	3	2
0	1	1	5	6	3	1	1	1	1	1	1	1	0	0	1	1	2	1	0	0	3	1
0	1	1	4	4	1	1	4	1	0	1	1	1	0	0	1	1	2	1	0	0	3	1
0	1	1	4	5	3	2	7	1	1	1	1	1	0	0	0	1	3	1	0	0	3	1
0	1	1	5	4	1	2	4	2	2	2	1	1	0	0	1	1	2	1	0	0	3	1
0	1	1	4	4	1	2	4	1	2	2	1	1	3	0	1	1	2	1	1	0	3	1
0	1	1	5	5	3	3	4	1	1	1	1	1	0	0	1	1	2	1	0	0	3	1
0	1	1	4	4	1	2	7	3	3	3	1	1	4	0	1	1	2	1	0	0	3	1
0	1	1	5	4	1	2	4	1	0	2	1	1	3	0	1	1	2	1	0	0	3	1
0	1	1	5	5	1	2	3	1	1	1	1	1	1	0	1	1	2	2	0	0	3	1
0	1	1	5	5	3	2	3	1	2	2	1	1	3	0	1	1	2	2	1	0	3	1
0	1	1	5	4	1	3	7	1	0	2	1	1	0	0	1	1	2	2	0	0	3	1
0	1	1	5	4	1	2	3	1	0	1	1	1	0	0	1	1	2	2	0	0	3	1
0	1	1	4	5	3	1	3	1	0	2	1	1	3	0	1	1	2	1	0	0	3	1
0	1	1	5	3	2	2	4	1	0	2	1	1	3	0	1	1	2	1	0	0	3	1
0	1	1	4	5	3	2	4	1	2	2	1	1	3	0	1	1	2	1	1	0	3	1
0	1	1	4	4	1	3	7	2	0	2	1	1	0	0	2	1	2	1	0	0	3	1
0	1	1	4	4	1	4	1	1	0	2	1	1	0	0	1	1	2	1	0	0	3	1
0	1	1	5	4	1	3	1	2	0	2	1	1	0	0	2	1	2	1	0	0	3	1
0	1	1	5	4	1	2	4	1	0	2	1	1	0	0	1	1	2	1	0	0	3	1
0	1	1	5	5	1	3	1	1	0	1	1	1	0	0	0	1	2	1	1	0	3	1
0	1	1	4	3	1	3	4	3	2	3	1	1	0	0	0	1	2	1	0	0	3	1
0	1	1	4	5	3	2	4	2	4	3	1	1	4	0	0	1	2	1	0	0	3	1
0	1	1	4	5	3	1	3	1	0	4	1	1	0	0	0	1	3	1	0	0	3	1
0	1	1	4	3	1	1	4	1	4	3	1	1	0	0	0	1	2	2	0	0	3	1
0	1	1	5	5	1	2	1	2	0	2	1	1	0	0	1	1	3	2	1	0	3	1
0	1	1	5	6	3	4	1	1	0	4	1	1	0	0	1	1	2	2	0	0	3	1
0	1	1	3	4	3	2	4	1	0	2	1	1	0	0	1	1	3	2	1	1	3	1
0	1	1	4	5	3	3	1	1	0	2	1	1	0	0	1	1	2	1	0	0	3	1
0	1	1	5	5	1	1	3	2	3	2	1	1	0	0	1	1	2	1	0	0	3	1
0	1	1	5	6	3	4	1	1	0	4	1	1	0	0	1	1	2	1	1	0	3	1
0	1	1	5	5	3	2	4	3	0	1	1	1	0	0	1	1	2	1	0	0	1	1
0	1	1	5	5	3	4	6	2	3	3	1	1	0	0	2	1	2	2	0	0	1	1
0	1	1	4	3	1	2	4	3	2	2	1	1	0	0	1	1	2	1	0	1	1	1
0	1	1	5	5	1	3	4	1	4	1	1	1	0	0	0	1	2	2	0	0	1	1
0	1	1	5	6	3	2	1	1	3	2	1	1	0	0	0	1	2	1	1	0	1	2
0	1	1	5	5	3	2	1	1	0	1	1	1	0	0	0	1	2	1	0	0	1	2
0	1	1	5	4	1	3	1	1	1	3	1	1	0	4	1	1	2	1	0	0	1	1
0	1	1	5	5	3	3	1	3	2	2	1	1	0	0	2	1	3	1	0	0	1	1
0	1	1	4	3	1	3	4	1	2	2	1	1	3	3	4	1	3	2	1	0	2	1
0	1	1	5	7	4	4	4	1	1	1	1	1	0	0	1	1	2	2	1	0	2	1
0	1	1	5	5	3	4	4	1	0	3	1	1	0	0	1	1	2	2	0	0	2	1
0	1	1	4	4	1	3	1	2	0	1	1	1	0	0	0	1	2	2	0	0	2	1
0	1	1	4	6	4	2	3	4	4	2	1	1	4	4	4	1	2	1	0	0	2	1
0	1	1	5	4	1	2	4	3	3	3	1	1	0	0	1	1	3	1	0	0	2	1
0	1	1	5	4	1	3	1	1	1	1	1	1	0	0	3	1	2	1	1	0	1	1
0	1	1	5	5	3	3	4	2	0	1	1	1	0	0	1	1	3	1	0	0	1	1
0	1	1	5	4	1	3	4	1	0	1	1	1	0	0	1	1	2	1	0	0	1	1
0	1	1	6	6	3	3	3	2	0	2	1	1	0	0	0	1	2	1	0	0	1	1
0	1	1	5	5	3	2	1	1	1	1	1	1	3	0	1	1	2	1	0	0	1	1
0	1	1	5	5	3	3	4	2	3	2	1	1	4	4	4	1	2	1	1	0	2	2
0	1	1	5	4	1	3	4	2	4	2	1	1	4	0	0	1	2	1	0	0	2	2
0	1	2	4	3	1	3	3	1	3	2	1	1	0	0	1	1	2	1	0	0	2	2
0	1	1	4	3	1	3	4	2	4	2	1	1	4	0	2	1	2	1	0	0	2	2
0	1	1	5	4	1	3	3	3	4	2	1	1	4	0	3	1	2	2	0	0	2	2
0	1	1	4	4	1	3	4	1	0	3	1	1	0	0	0	1	2	2	1	0	2	2
0	1	1	4	4	1	3	4	2	0	2	1	1	0	0	1	1	2	2	0	0	2	1
0	1	1	5	5	1	3	4	3	4	2	1	1	2	2	2	1	2	2	0	0	2	1
0	1	1	5	5	1	3	1	2	0	3	1	1	0	0	1	1	2	1	0	0	2	1
0	1	1	5	4	1	3	1	2	2	2	1	1	0	0	1	1	2	1	0	0	2	1
0	1	1	5	4	1	3	1	2	3	3	1	1	1	1	2	1	2	1	1	0	2	1
0	1	1	5	5	1	3	4	3	3	4	1	1	2	2	2	1	2	1	0	0	2	1
0	1	1	5	5	1	3	4	1	2	1	1	1	0	0	0	1	2	1	0	0	2	1
0	1	1	5	4	1	3	1	1	0	2	1	1	3	0	1	1	2	1	0	0	2	1
0	1	1	5	4	1	3	4	3	4	3	1	1	0	0	2	1	2	1	0	0	2	1
0	1	1	5	5	3	3	1	3	3	2	1	1	0	0	1	1	2	1	0	0	2	1
0	1	1	5	4	1	3	4	1	0	2	1	1	4	0	0	1	2	1	0	0	2	1
0	1	1	5	4	1	3	4	1	4	2	1	1	0	0	2	1	2	1	0	0	2	1
0	1	1	4	5	3	2	1	2	2	2	1	1	0	0	1	1	3	2	0	0	1	1
0	1	1	5	6	3	1	1	1	0	1	1	1	4	0	0	1	2	2	1	0	1	1
0	1	1	5	4	1	2	4	3	0	3	1	1	0	0	1	1	2	2	0	0	1	1
0	1	1	5	4	1	3	1	1	0	3	1	1	0	0	1	1	2	2	0	0	1	1
0	1	1	5	5	3	4	4	1	0	4	1	1	0	0	1	1	3	1	0	0	1	1
0	1	1	5	3	1	2	4	3	4	4	1	1	0	0	2	1	2	1	0	0	1	1
0	1	1	5	4	1	2	4	1	0	3	1	1	0	0	1	1	2	1	1	0	1	1
0	1	1	5	4	1	4	1	1	1	1	1	1	0	0	1	1	2	1	0	0	1	1
0	1	1	4	3	2	2	1	2	4	1	1	1	4	0	0	1	2	1	0	0	1	1
0	1	1	5	4	1	2	4	1	0	4	1	1	0	0	1	1	3	1	0	0	1	1
0	1	1	5	5	1	1	1	1	0	1	1	1	0	0	1	1	3	1	0	0	1	1
0	1	1	4	4	1	2	1	1	3	2	1	1	4	0	4	1	2	1	1	0	1	1
0	1	1	5	5	1	1	1	1	1	0	1	1	0	0	0	1	2	1	0	0	1	1
0	1	1	5	5	3	1	3	1	0	4	1	1	0	0	1	1	2	1	0	0	1	1
0	1	1	5	5	3	2	6	1	0	4	1	1	0	0	1	1	3	1	0	0	1	1
0	1	1	5	5	3	1	3	3	1	2	1	1	0	0	0	1	3	2	0	0	1	1
0	1	1	5	4	1	2	1	1	1	3	1	1	0	0	0	1	2	2	1	0	1	1
0	1	1	5	4	1	2	7	1	0	2	1	1	0	0	1	1	2	2	0	0	1	1
0	1	1	5	4	1	2	1	1	0	2	1	1	0	0	1	1	2	2	0	0	1	1
0	1	1	4	5	3	1	4	1	0	4	1	1	0	0	1	1	2	1	0	0	1	1
0	1	1	5	5	3	2	4	1	0	2	1	1	4	0	1	1	2	1	0	0	1	1
0	1	1	5	4	1	3	1	1	4	4	1	1	0	0	1	1	2	1	1	0	1	1
0	1	1	5	4	1	2	4	1	0	3	1	1	0	0	1	1	2	1	0	0	1	1
0	1	1	5	4	1	3	4	1	1	1	1	1	0	0	1	1	2	1	0	0	1	1
0	1	1	5	5	3	3	4	1	1	1	1	1	0	0	1	1	2	1	0	0	1	1
0	1	1	4	4	1	4	1	1	3	3	1	1	0	0	1	1	2	1	0	0	1	1
0	1	1	5	3	1	3	1	1	0	3	1	1	3	0	1	1	2	1	1	0	1	1
0	1	1	4	4	1	2	4	1	2	1	1	1	4	0	0	1	2	1	1	0	1	1
0	1	1	5	5	3	4	1	1	3	3	1	1	3	3	1	1	3	1	1	0	1	1
0	1	1	5	4	1	2	4	2	2	2	1	1	3	0	1	1	2	2	0	0	1	1
0	1	1	5	5	1	2	4	2	0	2	1	1	0	0	1	1	2	2	1	0	1	1
0	1	1	4	5	3	2	1	1	3	2	1	1	0	0	1	1	2	2	0	0	1	1
0	1	1	5	4	1	2	4	2	3	4	1	1	4	4	4	1	2	2	0	0	1	1
0	1	1	5	4	1	3	7	1	0	1	1	1	0	0	1	1	2	1	0	0	3	1
0	1	1	4	4	1	2	1	3	0	2	1	1	2	3	0	1	2	1	0	0	3	1
0	1	1	5	5	3	2	1	1	1	2	1	1	4	0	1	1	2	1	1	0	3	1
0	1	1	5	5	3	1	3	2	3	3	1	1	2	3	3	1	1	1	0	0	3	2
0	1	1	5	5	3	2	4	3	2	3	1	1	0	2	3	1	3	1	0	0	3	2
0	1	1	5	5	1	3	4	2	3	2	1	1	0	0	2	1	3	1	0	0	3	2
0	1	1	5	4	1	2	3	2	1	2	1	1	3	0	1	1	2	1	1	0	3	1
0	1	1	5	5	3	2	3	2	4	2	1	1	4	0	1	1	2	1	0	0	3	1
0	1	1	5	5	3	3	1	1	0	1	1	1	0	0	1	1	2	1	0	0	3	1
0	1	1	5	5	3	1	4	1	3	3	1	1	4	0	1	1	2	1	0	0	3	1
0	1	1	5	4	1	4	4	1	1	1	1	1	0	0	1	1	2	2	0	0	3	1
0	1	1	5	5	1	4	4	1	1	1	1	1	0	0	1	1	2	2	1	0	3	1
0	1	1	5	4	1	3	3	2	3	2	1	1	0	0	0	1	2	2	0	0	3	1
0	1	1	4	4	1	2	4	2	0	4	1	1	0	0	1	1	2	2	0	0	3	1
0	1	1	5	5	3	3	4	1	1	1	1	1	3	0	1	1	2	1	0	0	3	1
0	1	1	5	4	1	2	4	4	2	3	1	1	4	0	2	1	2	1	0	0	3	1
0	1	1	5	5	1	1	3	3	3	3	1	1	4	0	0	1	2	1	1	0	3	1
0	1	1	5	5	1	2	3	2	3	2	1	1	0	0	1	1	2	1	0	0	3	1
0	1	1	5	4	1	2	4	2	0	3	1	1	0	0	2	1	2	1	0	0	3	1
0	1	1	5	5	3	3	3	1	0	1	1	1	0	0	1	1	2	1	0	0	3	1
0	1	1	5	5	1	1	4	1	2	2	1	1	0	0	1	1	2	1	1	0	3	1
0	1	1	6	4	1	1	3	1	0	3	1	1	4	0	0	1	2	1	0	0	3	1
0	1	1	5	3	1	2	4	1	3	3	1	1	4	0	0	1	2	1	0	0	3	1
0	1	1	5	5	1	2	6	3	3	3	1	1	4	0	2	1	2	1	0	0	3	1
0	1	1	5	5	3	2	3	1	2	1	1	1	0	1	1	1	2	2	0	0	3	1
0	1	1	4	5	3	2	1	1	2	2	1	1	0	0	1	1	2	2	1	0	3	1
0	1	1	5	4	1	3	1	2	2	2	1	1	0	0	1	1	2	2	0	0	3	1
0	1	1	5	5	1	1	3	1	0	2	1	1	4	0	3	1	2	2	0	0	3	1
0	1	2	5	4	1	3	4	1	1	1	1	1	0	0	1	1	3	1	0	0	3	1
0	1	1	3	4	3	1	6	3	1	4	1	1	4	0	1	1	3	1	0	0	3	1
0	1	1	4	4	1	2	4	1	4	3	1	1	0	0	1	1	3	1	1	0	3	1
0	1	1	5	4	1	2	3	1	3	2	1	1	3	0	0	1	3	1	0	0	3	1
0	1	1	3	4	3	1	1	1	2	4	1	1	4	0	1	1	3	1	0	0	3	1
0	1	1	4	5	3	2	3	3	2	2	1	1	0	0	4	1	2	1	0	0	1	1
0	1	1	5	5	3	4	1	1	4	2	1	1	0	0	1	1	2	2	1	0	1	1
0	1	1	5	4	1	2	4	2	3	2	1	1	3	0	3	1	2	1	0	0	1	1
0	1	1	5	5	3	2	3	1	0	2	1	1	0	0	1	1	2	1	0	0	1	1
0	1	1	5	5	3	1	4	1	3	3	1	1	4	0	1	1	3	2	0	0	1	2
0	1	1	5	5	3	3	3	2	0	1	1	1	0	0	1	1	3	2	0	0	1	2
0	1	1	4	4	1	1	1	2	3	3	1	1	0	0	0	1	2	2	1	0	1	2
0	1	1	4	4	1	2	3	2	1	1	1	1	0	0	2	1	2	2	0	0	1	1
0	1	1	5	7	4	2	4	3	1	2	1	1	0	0	1	1	3	1	0	0	1	1
0	1	1	5	4	1	2	1	2	0	2	1	1	0	0	1	1	3	1	0	0	1	1
0	1	1	5	4	1	2	4	1	0	2	1	1	0	0	0	1	2	1	1	0	1	1
0	1	1	4	5	3	2	4	1	0	3	1	1	0	0	1	1	2	1	0	0	2	1
0	1	1	5	6	3	3	1	1	3	1	1	1	3	0	1	1	2	1	0	0	2	1
0	1	1	5	4	1	1	4	3	0	3	1	1	0	0	2	1	3	1	0	0	1	1
0	1	1	5	5	1	3	4	2	2	1	1	1	0	0	2	1	3	1	0	0	1	1
0	1	1	5	4	1	1	4	3	3	2	1	1	0	1	2	1	2	1	1	0	1	1
0	1	1	5	4	1	3	4	1	0	2	1	1	3	0	0	1	2	2	0	0	2	1
0	1	1	5	4	1	3	1	4	0	3	1	1	0	0	0	1	2	1	0	0	2	1
0	1	1	5	4	1	3	4	2	0	2	1	1	2	0	2	1	2	1	0	0	2	1
0	1	1	5	4	1	3	1	3	0	2	1	1	0	0	0	1	3	2	0	0	2	1
0	1	1	6	4	1	3	1	2	1	1	1	1	0	0	3	1	2	2	1	0	2	1
0	1	1	5	5	1	3	3	1	2	1	1	1	0	0	0	1	2	2	0	0	2	1
0	1	1	5	4	1	3	4	2	3	2	1	1	0	0	0	1	2	2	0	0	2	1
0	1	1	4	3	2	3	3	4	0	2	1	1	0	0	0	1	2	1	0	0	2	1
0	1	1	5	5	3	3	4	1	0	2	1	1	0	0	1	1	3	1	0	0	2	1
0	1	1	5	5	1	3	4	3	4	2	1	1	0	0	1	1	2	1	1	0	2	1
0	1	1	5	4	1	3	4	1	0	2	1	1	4	0	2	1	2	1	0	0	2	1
0	1	1	4	4	3	3	4	2	2	2	1	1	0	0	0	1	2	1	0	0	2	1
0	1	1	4	4	1	3	4	2	2	2	1	1	0	0	1	1	2	1	0	0	2	1
0	1	1	4	4	1	3	4	1	0	2	1	1	0	0	1	1	2	1	0	0	2	1
0	1	1	5	5	3	3	4	1	1	1	1	1	0	0	2	1	2	1	1	0	2	1
0	1	1	4	5	3	3	1	1	0	1	1	1	0	0	1	1	2	1	0	0	2	1
0	1	1	4	3	1	3	7	2	0	2	1	1	3	0	0	1	2	1	0	0	2	1
0	1	1	5	4	1	3	1	3	0	1	1	1	4	0	2	1	2	1	0	0	2	1
0	1	1	5	4	1	3	1	1	0	2	1	1	4	0	2	1	2	2	0	0	1	1
0	1	1	5	4	1	3	1	3	0	3	1	1	0	0	2	1	2	2	1	0	1	1
0	1	1	5	4	1	2	1	1	0	4	1	1	3	0	3	1	2	2	0	0	1	1
0	1	1	5	5	3	2	4	3	4	2	1	1	3	3	2	1	2	2	0	0	1	1
0	1	1	5	4	1	2	3	3	3	4	1	1	0	0	1	1	2	1	0	0	1	1
0	1	1	4	4	1	2	4	2	3	3	1	1	4	0	0	1	3	1	0	0	1	1
0	1	1	5	4	1	2	1	1	0	1	1	1	3	0	1	1	2	1	1	0	1	1
0	1	1	5	4	1	3	1	1	1	2	1	1	0	0	1	1	2	1	0	0	1	1
0	1	1	5	5	1	2	4	1	0	1	1	1	0	0	1	1	2	1	0	0	1	1
0	1	1	5	4	1	2	7	1	3	3	1	1	0	0	1	1	2	1	0	0	1	1
0	1	1	5	5	3	1	4	1	2	2	1	1	0	0	1	1	3	1	0	0	1	1
0	1	1	5	4	1	3	4	1	4	3	1	1	0	0	1	1	2	1	1	0	1	1
0	1	1	5	4	1	2	4	3	4	4	1	1	0	0	2	1	2	1	0	0	1	1
0	1	1	4	4	1	2	4	3	0	3	1	1	0	0	0	1	2	1	0	0	1	1
0	1	1	5	4	1	2	4	3	4	4	1	1	4	4	2	1	2	2	0	0	1	1
0	1	1	5	3	1	2	4	1	2	2	1	1	3	0	0	1	2	2	1	0	1	1
0	1	1	5	3	2	3	1	4	4	4	1	1	0	0	1	1	2	2	0	0	1	1
0	1	1	4	5	3	2	4	1	4	4	1	1	0	0	1	1	3	1	0	0	1	1
0	1	1	5	5	3	2	1	2	2	2	1	1	0	0	1	1	2	1	0	0	1	1
0	1	1	4	4	1	2	1	1	4	4	1	1	0	0	1	1	2	1	1	0	1	1
0	1	1	5	5	3	3	6	1	1	3	1	1	0	0	1	1	2	1	0	0	1	1
0	1	1	5	6	3	2	3	1	1	1	1	1	0	0	3	1	2	1	0	0	1	1
0	1	1	4	3	1	2	1	2	0	4	1	1	0	0	0	1	2	1	0	0	1	1
0	1	1	5	5	3	4	1	1	2	3	1	1	3	0	1	1	2	1	0	0	1	1
0	1	1	5	3	2	4	1	1	3	2	1	1	0	0	1	1	2	1	1	0	1	1
0	1	1	5	4	1	2	4	2	2	2	1	1	0	0	0	1	2	1	0	0	1	1
0	1	1	5	4	1	4	4	1	1	2	1	1	4	0	1	1	2	1	1	0	1	1
0	1	1	5	5	3	2	4	2	1	2	1	1	0	0	3	1	2	1	0	0	1	1
0	1	1	5	5	1	2	4	1	4	4	1	1	0	0	1	1	2	2	0	0	1	1
0	1	1	5	5	3	2	4	1	4	4	1	1	4	0	1	1	2	2	1	0	1	1
0	1	1	5	4	1	2	4	1	3	3	1	1	0	0	1	1	2	2	0	0	1	1
0	1	1	5	4	1	3	4	3	1	2	1	1	0	0	3	1	2	2	0	0	1	1
0	1	1	5	4	1	3	1	1	1	1	1	1	0	0	2	1	2	1	0	0	1	1
0	1	1	4	4	1	2	1	2	0	3	1	1	4	0	2	1	3	1	1	0	1	1
0	1	1	4	4	1	2	1	3	0	1	1	1	0	0	1	1	2	1	0	0	1	1
0	1	1	5	4	1	2	4	1	0	4	1	1	0	0	1	1	2	1	0	0	1	1
0	1	1	4	3	1	3	7	1	0	2	1	1	0	0	1	1	3	1	0	0	1	1
0	1	1	5	5	3	2	4	1	1	1	1	1	0	0	0	1	2	1	0	0	1	1
0	1	1	5	4	1	2	4	1	0	3	1	1	0	0	1	1	2	2	1	0	1	1
0	1	1	5	5	3	2	4	1	0	3	1	1	4	0	1	1	2	1	0	0	1	1
0	1	1	5	5	3	3	7	2	2	3	1	1	0	0	2	1	2	1	0	0	3	2
0	1	1	4	3	1	3	4	1	0	3	1	1	0	0	1	1	2	1	0	0	3	1
0	1	1	5	5	1	2	4	3	4	2	1	1	4	0	1	1	2	2	0	0	3	1
0	1	1	5	3	2	3	4	2	3	1	1	1	3	0	1	1	2	2	1	0	3	1
0	1	1	5	4	1	2	3	1	2	3	1	1	4	0	0	1	2	2	0	0	3	1
0	1	1	4	4	1	2	3	2	0	3	1	1	4	0	0	1	2	2	0	0	3	1
0	1	1	5	3	2	2	3	2	3	3	1	1	0	0	3	1	2	1	0	0	3	1
0	1	1	5	5	3	1	4	2	3	3	1	1	0	0	3	1	3	1	0	0	3	1
0	1	1	5	5	1	2	4	1	0	1	1	1	4	0	2	1	2	2	1	0	3	1
0	1	1	4	4	1	2	4	1	0	3	1	1	0	0	1	1	2	1	0	0	3	1
0	1	1	5	5	1	3	1	2	0	1	1	1	0	0	1	1	2	1	0	0	3	1
0	1	1	5	4	1	2	3	2	0	2	1	1	0	0	0	1	3	1	0	0	3	1
0	1	1	5	5	1	4	4	1	1	2	0	1	4	0	1	1	2	1	0	0	1	1
0	1	1	5	6	3	2	4	2	0	2	0	1	0	0	2	1	2	1	1	0	1	1
0	1	1	5	4	1	2	4	2	0	2	0	1	0	0	2	1	2	1	0	0	1	1
0	1	1	5	5	3	2	6	2	3	4	0	1	0	0	0	1	2	1	0	0	1	1
0	1	1	5	4	1	2	4	2	0	3	0	1	0	0	0	1	2	1	0	0	1	1
0	1	1	3	3	1	3	4	4	4	3	0	1	0	0	0	1	2	2	0	0	1	1
0	1	1	5	5	3	1	4	2	0	2	0	1	0	0	0	1	2	2	0	0	1	2
0	1	1	4	5	3	3	4	2	2	2	0	1	0	0	1	1	3	1	0	0	1	2
0	1	1	5	6	3	1	6	2	1	1	0	1	0	0	0	1	2	1	0	0	1	1
0	1	1	4	5	3	3	7	1	0	1	0	1	0	0	3	1	2	1	1	0	1	1
0	1	1	4	4	1	3	4	2	1	2	0	1	4	0	0	1	2	1	0	0	1	1
0	1	1	4	5	3	2	1	1	2	2	0	1	0	1	0	1	2	1	0	0	1	1
0	1	1	5	5	3	3	3	3	4	4	0	1	0	0	1	1	2	1	0	0	1	1
0	1	1	5	5	3	3	4	3	2	2	0	1	0	0	2	1	3	1	0	0	1	1
0	1	1	5	7	4	1	4	1	0	2	0	1	0	0	4	1	2	1	1	0	1	1
0	1	1	3	4	3	1	4	2	0	0	0	1	0	0	0	1	2	2	0	0	2	1
0	1	1	5	6	3	1	4	3	1	2	0	1	4	0	1	1	2	1	0	0	2	1
0	1	1	5	5	3	2	1	1	1	2	0	1	4	0	1	1	2	2	1	0	2	1
0	1	1	5	6	3	1	6	1	0	2	0	1	0	0	1	1	2	2	1	0	2	1
0	1	1	5	5	3	2	4	1	4	4	0	1	0	0	0	1	3	2	0	0	2	1
0	1	1	4	5	4	1	4	2	2	4	0	1	0	0	1	1	2	2	0	0	2	2
0	1	1	5	3	1	3	6	1	0	4	0	1	0	0	4	1	2	1	0	0	2	2
0	1	1	5	5	1	2	4	1	0	1	0	1	2	0	0	1	2	1	0	0	2	2
0	1	1	5	5	1	2	4	1	0	1	0	1	0	0	1	1	2	1	1	0	2	2
0	1	1	5	6	3	4	4	3	0	2	0	1	0	0	0	1	2	1	0	0	2	2
0	1	1	5	6	4	3	4	1	1	2	0	1	4	0	4	1	2	1	0	0	2	1
0	1	1	4	4	1	1	4	1	0	2	0	1	0	0	0	1	3	1	0	0	2	1
0	1	1	5	6	4	4	4	1	1	1	0	1	0	0	0	1	3	1	0	0	2	1
0	1	1	5	4	1	3	4	3	3	3	0	1	0	0	1	1	2	1	1	0	2	1
0	1	1	6	5	1	2	4	1	1	2	0	1	0	0	2	1	2	1	0	0	2	1
0	1	1	4	5	3	3	1	1	0	3	0	1	4	3	2	1	2	2	0	0	1	1
0	1	1	5	3	2	3	3	1	0	1	0	1	0	0	1	1	2	2	1	0	2	2
0	1	1	4	4	1	3	4	2	0	3	0	1	0	0	1	1	2	2	0	0	2	1
0	1	1	5	5	3	3	1	3	0	2	0	1	0	0	0	1	2	2	0	0	2	1
0	1	1	5	4	1	3	4	1	0	3	0	1	0	0	0	1	2	1	0	0	2	1
0	1	1	5	4	1	3	1	2	0	2	0	1	0	0	1	1	3	1	0	0	2	1
0	1	1	5	4	1	3	1	1	0	3	0	1	3	0	3	1	3	1	1	0	2	1
0	1	1	4	4	1	3	4	1	4	1	0	1	4	0	3	1	2	1	0	0	2	1
0	1	1	5	4	1	3	4	2	0	2	0	1	0	0	0	1	2	1	0	0	2	1
0	1	1	5	5	1	3	3	2	0	2	0	1	0	0	0	1	2	1	0	0	2	1
0	1	1	4	4	3	3	4	1	2	3	0	1	0	0	1	1	2	1	0	0	2	1
0	1	1	5	2	2	3	4	2	4	3	0	1	0	0	0	1	2	1	1	0	2	1
0	1	1	4	4	1	3	4	2	2	1	0	1	2	0	1	1	2	2	0	0	2	1
0	1	1	5	4	1	3	4	1	0	2	0	1	0	0	3	1	2	1	0	0	2	1
0	1	1	6	5	1	3	1	2	0	2	0	1	0	0	2	1	2	1	0	0	2	1
0	1	1	6	6	3	3	1	2	1	1	0	1	0	0	2	1	2	2	0	0	2	1
0	1	1	6	6	3	3	7	4	2	2	0	1	3	0	2	1	2	2	1	0	2	1
0	1	1	5	4	1	3	4	2	2	2	0	1	2	0	0	1	2	2	0	0	2	1
0	1	1	4	4	1	3	4	2	4	2	0	1	3	3	3	1	2	2	0	0	2	1
0	1	1	5	5	3	3	7	2	4	2	0	1	0	0	1	1	2	1	0	0	2	1
0	1	1	5	6	3	3	1	1	1	2	0	1	0	2	2	1	2	2	0	0	2	1
0	1	1	5	4	1	3	4	3	0	3	0	1	0	0	0	1	2	1	1	0	2	1
0	1	1	4	4	1	3	4	2	2	2	0	1	0	0	0	1	2	1	0	0	2	1
0	1	1	5	4	1	2	4	1	0	2	0	1	4	0	0	1	2	1	0	0	1	1
0	1	1	4	4	1	3	4	1	0	2	0	1	3	0	1	1	2	1	0	0	1	1
0	1	1	4	5	3	1	4	1	1	3	0	1	0	0	1	1	2	1	0	0	1	1
0	1	1	4	5	3	1	4	1	0	3	0	1	0	0	0	1	2	1	1	0	1	1
0	1	1	5	4	1	2	7	2	0	1	0	1	0	0	2	1	2	1	0	0	1	1
0	1	1	5	5	1	1	1	2	4	4	0	1	0	0	1	1	3	1	0	0	1	1
0	1	1	5	7	4	4	7	3	4	4	0	1	0	0	2	1	2	1	0	0	1	1
0	1	1	4	5	3	1	1	2	0	2	0	1	0	0	2	1	2	2	0	0	1	1
0	1	1	4	3	2	1	4	1	4	3	0	1	4	0	0	1	2	2	0	0	1	1
0	1	1	5	5	3	3	3	2	3	2	0	1	4	0	2	1	3	2	0	0	1	1
0	1	1	4	4	1	2	4	3	2	2	0	1	4	4	2	1	2	1	0	0	1	1
0	1	1	5	5	3	2	4	2	0	2	0	1	2	0	2	1	2	1	1	0	1	1
0	1	1	4	4	1	2	1	2	0	2	0	1	2	0	1	1	2	1	0	0	1	1
0	1	1	4	5	3	2	1	1	0	2	0	1	0	0	1	0	3	1	0	0	1	1
0	1	1	5	6	4	3	1	1	0	4	0	1	4	0	0	1	3	1	0	0	1	1
0	1	1	5	6	3	2	1	1	4	3	0	1	4	0	1	1	2	1	0	0	1	1
0	1	1	5	4	1	3	1	1	1	3	0	1	4	0	1	1	2	1	1	0	1	1
0	1	1	4	5	3	1	7	1	3	2	0	1	0	0	1	1	2	1	0	0	1	1
0	1	1	5	4	1	3	1	3	4	4	0	1	0	0	2	1	2	1	0	0	1	1
0	1	1	4	4	1	2	1	1	2	1	0	1	3	0	1	1	2	2	0	0	1	1
0	1	1	5	4	1	2	1	2	0	2	0	1	0	0	1	1	2	2	1	0	1	1
0	1	1	5	5	3	1	1	1	0	2	0	1	4	0	1	1	2	2	0	0	1	1
0	1	1	5	4	1	2	4	1	0	4	0	1	0	0	1	1	2	2	0	0	1	1
0	1	1	5	4	1	2	3	1	0	2	0	1	0	0	1	1	3	1	0	0	1	1
0	1	1	6	4	2	2	3	4	3	4	0	1	4	0	1	1	3	1	0	0	1	1
0	1	1	5	4	1	1	4	3	4	4	0	1	0	0	2	1	2	1	1	0	1	1
0	1	1	5	4	1	2	4	3	4	4	0	1	0	0	2	1	2	1	0	0	1	1
0	1	1	5	4	1	2	4	3	4	4	0	1	0	0	3	1	2	1	0	0	1	1
0	1	1	4	4	1	1	7	1	0	2	0	1	3	0	2	1	2	1	0	0	1	1
0	1	1	5	6	3	1	1	1	0	2	0	1	0	0	1	1	2	1	0	0	1	1
0	1	1	4	4	1	3	1	1	2	2	0	1	0	0	1	1	2	1	1	0	1	1
0	1	1	5	5	3	2	1	2	2	3	0	1	0	0	1	1	2	1	0	0	1	1
0	1	1	5	5	3	2	1	1	1	2	0	1	2	0	3	1	2	1	0	0	1	1
0	1	1	5	4	1	1	1	1	4	4	0	1	3	0	3	1	2	1	0	0	1	1
0	1	1	5	3	2	2	4	2	4	2	0	1	3	0	4	1	2	2	0	0	1	1
0	1	1	4	4	1	2	4	1	3	2	0	1	3	0	1	1	2	2	1	0	1	1
0	1	1	5	4	1	4	4	1	4	4	0	1	0	0	4	1	2	2	0	0	1	1
0	1	1	4	5	3	3	1	1	4	4	0	1	0	0	1	1	2	2	0	0	1	1
0	1	1	5	5	1	1	1	1	0	2	0	1	0	0	1	1	3	1	0	0	1	1
0	1	1	4	3	1	2	6	1	2	2	0	1	0	0	1	1	2	1	0	0	1	1
0	1	1	5	5	1	2	1	1	4	2	0	1	0	0	1	1	2	1	1	0	1	1
0	1	1	5	5	3	4	4	1	3	3	0	1	0	0	0	1	2	1	0	0	1	1
0	1	1	4	4	1	2	1	2	2	2	0	1	4	0	1	1	2	1	0	0	1	1
0	1	1	4	4	1	2	4	1	1	1	0	1	0	0	0	1	2	1	0	0	1	1
0	1	1	5	5	3	2	1	3	0	2	0	1	3	0	0	1	2	1	0	0	1	1
0	1	1	5	4	1	3	4	1	1	3	0	1	4	4	1	1	2	1	1	0	1	1
0	1	1	4	3	1	2	4	1	2	2	0	1	4	4	4	1	2	1	0	0	1	1
0	1	1	5	4	1	2	4	1	1	1	0	1	3	0	1	1	2	1	0	0	1	1
0	1	1	5	5	1	3	4	2	1	2	0	1	0	0	1	1	3	2	0	0	1	1
0	1	1	4	4	1	3	4	2	2	2	0	1	0	0	3	1	2	2	1	0	1	1
0	1	1	5	4	1	4	1	1	3	3	0	1	4	3	2	1	3	2	0	0	1	1
0	1	1	4	5	3	2	4	1	0	4	0	1	0	0	2	1	2	2	0	0	1	1
0	1	1	5	4	1	2	1	1	4	4	0	1	0	0	0	1	3	1	0	0	1	1
0	1	1	5	4	1	2	7	1	0	2	0	1	0	0	1	1	2	1	0	0	1	1
0	1	1	4	4	1	3	1	2	0	2	0	1	0	0	1	1	2	1	1	0	1	1
0	1	1	4	4	1	3	1	1	1	2	0	1	4	0	1	1	2	1	0	0	1	1
0	1	1	5	4	1	2	1	2	3	2	0	1	3	0	2	1	2	1	0	0	1	1
0	1	1	5	5	3	4	1	1	2	2	0	1	0	0	1	1	3	1	0	0	1	1
0	1	1	4	4	1	2	4	1	3	2	0	1	3	0	1	1	2	1	0	0	1	1
0	1	1	4	4	1	3	4	1	0	4	0	1	0	0	3	1	2	1	1	0	1	1
0	1	1	4	3	1	2	3	2	0	0	0	1	0	0	1	1	2	1	0	0	1	1
0	1	1	5	4	1	2	4	3	0	3	0	1	0	0	0	1	2	1	0	0	1	1
0	1	1	4	4	1	2	4	2	0	2	0	1	3	0	2	1	3	1	0	0	1	1
0	1	1	5	4	1	1	3	3	2	3	0	1	0	2	3	1	3	2	0	0	3	2
0	1	1	4	4	1	2	4	3	3	2	0	1	3	2	3	1	2	2	1	0	3	2
0	1	1	5	5	3	3	7	2	3	2	0	1	2	0	2	1	2	2	0	0	3	2
0	1	1	6	5	1	4	3	1	0	1	0	1	1	0	2	1	2	1	0	0	3	1
0	1	1	5	4	1	2	4	2	3	3	0	1	0	0	2	1	2	1	0	0	3	1
0	1	1	5	4	1	1	4	3	0	3	0	1	0	0	0	1	2	1	1	0	3	1
0	1	1	5	5	3	1	3	2	3	2	0	1	0	0	3	1	2	1	0	0	3	1
0	1	1	5	5	3	2	4	2	2	2	0	1	4	0	1	1	2	1	0	0	3	1
0	1	1	5	4	1	2	4	1	2	1	0	1	0	0	0	1	2	1	0	0	3	1
0	1	1	5	5	3	1	3	1	2	2	0	1	4	0	1	1	2	1	0	0	3	1
0	1	1	5	5	1	3	1	2	4	1	0	1	4	0	1	1	3	1	1	0	3	1
0	1	1	4	5	3	2	1	1	2	4	0	1	0	0	0	1	2	1	0	0	3	1
0	1	1	5	4	1	2	4	1	1	1	0	1	0	0	1	1	2	1	0	0	3	1
0	1	1	4	3	1	2	4	2	3	4	0	1	4	0	3	1	2	2	0	0	3	1
0	1	1	5	5	3	2	1	2	0	3	0	1	0	0	2	1	3	2	0	0	3	1
0	1	1	5	3	2	4	1	2	2	2	0	1	4	0	0	1	2	2	0	0	3	1
0	1	1	5	6	3	3	4	2	2	2	0	1	0	0	2	1	2	1	0	0	3	1
0	1	1	5	6	3	4	1	1	4	4	0	1	0	0	1	1	2	1	0	1	3	1
0	1	1	5	4	1	3	4	2	0	2	0	1	0	0	2	1	2	2	1	0	3	1
0	1	1	5	4	1	2	4	1	0	2	0	1	0	0	2	1	3	1	0	0	3	1
0	1	1	5	5	1	2	1	2	0	1	0	1	0	0	0	1	2	1	0	0	3	1
0	1	1	4	4	1	3	4	1	2	3	0	1	0	0	1	1	3	1	0	0	3	1
0	1	1	5	5	3	1	1	1	4	2	1	0	0	0	1	1	3	1	0	0	1	2
0	1	1	5	4	1	2	4	1	4	4	1	1	0	0	1	1	2	1	1	0	1	1
0	1	1	4	5	3	1	7	1	4	2	1	0	0	0	3	1	3	1	0	0	1	1
0	1	1	5	6	3	1	4	1	0	4	1	1	0	0	1	1	2	1	0	0	2	1
0	1	1	6	6	3	3	1	1	1	1	1	0	0	0	1	1	2	1	0	0	2	1
0	1	1	5	5	3	2	4	2	2	2	1	0	0	0	3	1	2	2	0	0	1	1
0	1	1	5	4	1	3	4	1	0	3	1	1	0	0	1	1	2	2	1	0	2	1
0	1	2	5	6	3	2	4	2	1	2	1	0	4	4	1	1	3	2	0	0	1	1
0	1	1	4	5	3	1	3	1	0	1	1	1	2	0	1	1	2	2	0	0	1	1
0	1	1	4	6	4	2	1	1	3	4	1	0	0	0	2	1	2	1	0	0	1	1
0	1	1	5	5	3	2	7	1	0	3	1	0	3	0	1	1	2	1	0	0	1	1
0	1	1	4	4	3	3	4	1	1	1	1	1	0	0	1	1	2	1	1	0	1	1
0	1	1	4	4	3	2	1	1	1	3	1	0	0	0	1	1	2	1	0	0	1	1
0	1	1	5	3	1	2	6	1	1	2	1	1	0	0	1	1	3	1	0	0	3	1
0	1	1	5	4	1	1	4	1	0	4	1	0	0	0	1	1	2	1	0	0	1	1
0	1	1	5	6	3	4	3	1	0	2	1	0	0	0	2	1	3	1	0	0	1	1
0	1	1	5	5	3	2	4	1	0	3	1	1	0	0	0	1	2	1	1	0	1	1
0	1	1	5	5	3	4	4	1	2	2	1	0	3	0	1	1	3	1	0	0	1	1
0	1	1	4	3	1	2	4	3	3	3	1	1	0	0	1	1	2	1	0	0	3	1
0	1	1	5	4	1	2	4	4	0	3	1	0	4	4	1	1	3	1	0	0	3	1
0	1	1	5	4	1	3	4	4	0	1	1	0	0	0	1	1	3	2	0	0	1	1
0	1	1	5	5	3	1	4	2	0	3	1	1	0	0	1	1	2	2	1	0	1	2
0	1	1	5	6	3	1	3	2	2	2	1	0	0	0	2	1	3	2	0	0	1	2
0	1	1	5	4	1	2	6	1	0	1	1	1	4	0	1	1	2	2	0	0	1	2
0	1	1	5	4	1	2	4	3	3	2	1	0	0	0	3	1	2	1	0	0	2	1
0	1	1	5	6	3	2	4	2	3	2	1	0	0	0	1	1	2	1	0	0	2	2
0	1	1	6	7	3	3	4	2	1	2	1	1	0	0	0	1	2	2	1	0	2	1
0	1	1	4	6	4	1	4	2	2	2	1	0	0	0	3	1	2	1	0	0	2	1
0	1	1	4	6	4	3	7	2	0	2	1	1	0	0	0	1	2	1	0	0	2	1
0	1	1	5	6	3	3	4	3	2	2	1	0	0	0	1	1	2	1	0	0	2	1
0	1	1	4	4	1	2	3	2	0	2	1	0	0	0	2	1	3	1	0	0	2	1
0	1	1	5	4	1	4	4	2	1	1	1	1	0	3	1	1	2	1	1	0	2	1
0	1	1	4	5	3	3	4	1	0	1	1	0	0	0	1	1	2	1	0	0	1	1
0	1	1	5	5	1	2	4	3	3	3	1	1	0	0	1	1	2	1	0	0	1	1
0	1	1	5	4	1	2	4	1	0	1	1	0	0	0	0	1	2	1	0	0	1	1
0	1	1	4	3	1	3	3	2	0	1	1	0	0	0	1	1	2	2	0	0	2	2
0	1	1	5	4	1	3	4	4	0	1	1	1	2	0	2	1	2	2	1	0	2	1
0	1	1	5	4	1	3	3	2	3	2	1	0	4	0	0	1	2	2	0	1	2	1
0	1	1	5	7	4	3	4	3	0	1	1	1	0	0	1	1	2	2	0	0	2	1
0	1	1	5	6	4	3	1	1	0	1	1	0	0	0	2	1	2	1	0	0	2	1
0	1	1	4	5	3	3	1	1	3	3	1	0	3	4	1	1	2	1	0	0	2	1
0	1	1	5	4	1	2	1	1	1	1	1	1	0	0	1	1	2	1	1	0	1	1
0	1	1	5	4	1	2	3	1	0	2	1	0	0	0	1	1	3	1	0	0	1	1
0	1	1	4	5	3	2	4	1	4	2	1	1	4	0	1	1	2	1	0	0	1	1
0	1	1	5	4	1	2	1	3	4	4	1	0	0	0	2	1	2	1	0	0	1	1
0	1	1	5	4	1	2	4	3	4	4	1	0	0	0	2	1	3	1	0	0	1	1
0	1	1	5	4	1	2	4	2	3	4	1	1	4	4	2	1	3	1	1	0	1	1
0	1	1	4	4	1	3	1	1	0	2	1	0	0	0	1	1	2	1	0	0	1	1
0	1	1	5	5	3	2	1	2	2	2	1	1	0	0	1	0	2	1	0	0	1	1
0	1	1	5	3	2	2	3	1	2	2	1	0	0	0	1	0	2	1	0	0	1	1
0	1	1	5	6	3	3	4	1	0	2	1	0	0	0	1	0	3	2	0	0	1	1
0	1	1	5	5	1	2	1	1	0	2	1	1	0	0	1	0	2	2	1	0	1	1
0	1	1	5	4	1	2	1	1	2	2	1	0	0	0	1	0	2	2	0	0	1	1
0	1	1	5	5	3	2	3	1	0	2	1	1	0	0	1	1	2	2	0	0	1	1
0	1	1	5	4	1	2	4	1	0	2	1	0	0	0	0	1	2	1	0	0	1	1
0	1	1	5	4	1	3	3	1	3	4	1	0	2	0	3	1	3	1	0	0	1	1
0	1	1	5	5	3	3	1	1	0	3	1	0	0	0	1	1	2	1	0	0	1	1
0	1	1	5	5	1	2	3	1	0	2	1	1	0	0	1	0	2	1	0	0	1	1
0	1	1	4	5	3	1	4	1	0	2	1	0	0	0	3	0	2	1	0	0	1	1
0	1	1	5	5	3	2	3	1	0	2	1	0	2	0	1	1	3	1	0	0	1	1
0	1	1	5	4	1	2	1	1	0	2	1	1	0	0	1	0	2	1	1	0	1	1
0	1	1	5	4	1	2	4	1	0	2	1	0	4	0	1	0	3	1	0	0	1	1
0	1	1	5	5	1	4	4	1	1	2	1	1	0	0	0	0	3	1	0	0	1	1
0	1	1	5	6	3	2	1	1	0	4	1	0	0	0	1	1	3	1	0	0	1	1
0	1	1	5	4	1	3	4	1	0	3	1	0	0	0	1	0	3	2	0	0	1	1
0	1	1	4	6	4	2	4	1	0	3	1	1	0	0	0	1	2	2	1	0	1	1
0	1	1	5	5	3	2	1	2	3	2	1	0	3	0	1	1	2	2	0	0	1	1
0	1	1	4	5	3	3	1	1	0	1	1	1	4	4	1	1	3	2	0	0	1	1
0	1	1	5	5	1	2	1	2	1	1	1	0	0	0	0	1	2	1	0	0	1	1
0	1	1	5	3	1	3	1	2	3	4	1	0	0	0	1	1	2	1	0	0	1	1
0	1	1	5	5	3	2	1	1	0	2	1	1	0	0	1	1	2	1	1	0	1	1
0	1	1	5	5	3	2	4	1	3	1	1	0	0	0	0	1	2	1	0	0	1	1
0	1	1	5	5	3	4	1	1	4	3	1	1	4	0	1	1	2	1	0	0	1	1
0	1	1	6	5	1	3	1	1	1	1	1	0	0	0	1	1	3	1	0	0	1	1
0	1	1	4	4	3	2	1	4	2	2	1	0	0	0	2	1	2	1	0	0	1	1
0	1	1	4	4	1	2	4	2	3	3	1	1	3	3	3	1	3	1	1	1	1	1
0	1	1	5	4	1	2	4	1	0	3	1	0	0	0	1	1	2	1	0	0	1	1
0	1	1	5	5	3	2	4	3	3	3	1	1	0	0	2	1	2	1	0	0	3	2
0	1	1	5	5	1	2	3	2	3	3	1	0	0	0	2	1	3	1	0	0	3	2
0	1	1	5	4	1	2	4	1	2	2	1	0	4	0	0	1	2	2	0	0	3	1
0	1	1	5	4	1	2	4	1	0	1	1	1	0	0	1	1	2	2	1	0	3	1
0	1	1	5	5	3	2	6	1	2	1	1	0	0	0	1	1	2	2	0	0	3	1
0	1	1	5	5	3	3	4	1	2	2	1	1	4	0	1	1	2	2	0	0	3	1
0	1	1	5	4	1	3	4	1	2	2	1	0	2	0	1	1	2	1	0	0	3	1
0	1	1	4	3	2	1	7	2	2	2	1	0	0	0	1	1	2	1	0	0	3	1
0	1	1	4	3	1	1	4	3	3	3	1	1	3	0	1	1	2	1	1	0	3	1
0	1	1	5	4	1	1	7	1	3	3	1	0	4	0	0	1	2	1	0	0	3	1
0	1	1	4	4	1	2	4	1	2	2	1	1	0	0	1	1	2	1	0	0	3	1
0	1	1	5	4	1	1	7	3	2	1	1	0	3	0	1	1	2	1	0	0	3	1
0	1	1	4	5	3	2	4	3	4	4	1	0	0	0	4	1	2	1	0	0	3	1
0	1	1	4	4	1	1	6	4	3	3	1	1	4	0	0	1	2	1	1	0	3	1
0	1	1	5	5	3	2	4	2	2	2	1	0	4	0	1	1	2	1	0	0	3	1
0	1	1	4	3	2	2	4	1	0	4	1	1	0	0	1	1	3	1	0	0	3	1
0	1	1	6	4	1	3	4	1	0	3	1	0	4	0	1	1	3	1	0	0	3	1
0	1	1	4	6	4	2	4	1	0	2	1	0	0	0	1	1	2	2	0	0	1	1
0	1	1	4	3	1	2	4	3	3	2	1	1	3	0	1	1	2	2	1	0	1	1
0	1	1	5	6	3	3	1	1	1	1	1	0	0	0	2	1	2	2	0	0	1	2
0	1	1	4	4	1	2	7	2	0	1	1	1	3	0	1	1	2	2	0	0	1	2
0	1	1	4	5	3	2	3	1	0	1	1	0	0	0	3	1	2	1	0	0	2	1
0	1	1	5	5	1	2	7	1	2	1	1	0	0	0	1	1	2	1	0	0	2	1
0	1	1	5	5	1	2	4	2	0	2	1	1	0	0	0	1	2	1	1	0	2	1
0	1	1	5	5	1	3	4	1	1	1	1	1	0	0	0	1	2	1	0	0	2	2
0	1	1	5	6	3	2	6	1	1	1	1	0	0	0	0	1	2	1	0	0	2	2
0	1	1	5	5	1	3	4	2	0	1	1	0	2	0	0	1	2	2	0	0	2	1
0	1	1	5	5	1	2	4	1	0	2	1	1	0	0	0	1	2	1	1	0	2	1
0	1	1	5	4	1	2	4	1	0	3	1	0	0	0	0	1	2	2	0	0	2	1
0	1	1	4	4	1	2	3	1	0	3	1	1	0	0	0	1	2	2	0	0	2	1
0	1	1	6	7	3	3	4	2	2	1	1	0	3	3	3	1	2	1	0	0	1	1
0	1	1	5	6	4	3	3	1	0	3	1	0	0	0	1	1	2	2	0	0	1	1
0	1	1	5	5	1	3	4	1	0	1	1	1	0	0	1	1	2	2	1	0	1	1
0	1	1	5	5	1	3	3	2	2	3	1	0	0	0	1	1	2	2	0	0	1	1
0	1	1	5	4	1	3	1	1	0	4	1	1	0	0	1	1	2	2	0	0	1	1
0	1	1	5	4	1	3	3	2	0	3	1	0	3	0	3	1	2	1	0	0	2	2
0	1	1	5	4	1	3	1	1	0	2	1	0	0	0	1	1	2	1	0	0	2	1
0	1	1	5	5	3	3	1	3	0	3	1	1	0	0	0	1	2	1	1	0	2	1
0	1	1	5	6	3	3	1	1	0	1	1	0	0	0	1	1	2	1	0	0	2	1
0	1	1	5	4	1	3	4	2	3	1	1	0	0	0	0	1	2	2	0	0	2	1
0	1	1	5	4	1	3	1	1	0	2	1	0	0	0	0	1	2	1	0	0	2	1
0	1	1	5	5	3	3	4	1	2	3	1	1	0	0	2	1	2	1	1	0	2	1
0	1	1	5	6	3	3	4	1	0	0	1	0	0	0	2	1	2	1	0	0	2	1
0	1	1	5	5	1	3	1	3	0	4	1	1	0	0	3	1	2	1	0	0	2	1
0	1	1	5	5	3	3	4	3	0	4	1	0	0	0	0	1	2	1	0	0	2	1
0	1	1	6	5	1	3	4	2	4	2	1	0	0	0	1	1	3	2	0	0	2	1
0	1	1	4	4	1	3	3	2	0	2	1	1	0	0	2	1	2	2	1	0	2	1
0	1	1	5	6	3	3	4	3	4	3	1	0	0	0	0	1	2	2	0	0	2	1
0	1	1	5	4	1	3	1	1	1	2	1	1	4	0	1	1	2	2	0	0	2	1
0	1	1	4	4	1	3	4	1	0	2	1	0	0	0	0	1	2	1	0	0	2	1
0	1	1	5	5	3	1	1	3	1	2	1	1	0	0	0	1	2	1	1	0	1	1
0	1	1	5	5	3	2	1	1	4	2	1	0	0	0	4	1	2	1	0	0	1	1
0	1	1	5	4	1	2	4	3	4	4	1	1	0	0	1	1	2	1	0	0	1	1
0	1	1	4	3	1	1	3	3	4	4	1	0	0	0	1	1	3	1	0	0	1	1
0	1	1	5	6	3	2	4	1	0	2	1	0	0	0	1	1	3	1	0	0	1	1
0	1	1	4	4	1	2	4	1	2	2	1	1	0	0	0	1	2	1	1	0	1	1
0	1	1	4	4	1	2	1	1	1	1	1	0	0	0	1	1	2	1	0	0	1	1
0	1	1	5	3	2	3	4	1	0	1	1	1	0	0	1	1	2	1	0	0	1	1
0	1	1	4	4	1	2	4	4	0	4	1	0	0	0	1	1	2	1	0	0	1	1
0	1	1	5	4	1	3	4	3	3	3	1	0	3	0	1	1	2	2	0	0	1	1
0	1	1	4	5	3	2	3	1	0	2	1	1	0	0	1	0	3	2	1	0	1	1
0	1	1	3	5	4	2	3	1	0	2	1	0	0	0	0	0	2	2	0	0	1	1
0	1	1	6	4	1	2	1	1	0	2	1	1	0	0	1	0	2	2	0	0	1	1
0	1	1	5	6	3	2	1	1	1	2	1	0	4	0	4	0	3	1	0	0	1	1
0	1	1	5	4	1	2	1	1	4	2	1	0	0	0	1	1	2	1	0	0	1	1
0	1	1	5	3	2	2	4	1	0	3	1	1	0	0	1	1	2	1	1	0	1	1
0	1	1	4	4	1	1	4	1	0	3	1	0	0	0	1	1	2	1	0	0	1	1
0	1	1	5	4	1	1	4	1	0	2	1	1	0	0	2	1	2	1	0	0	1	1
0	1	1	5	4	1	3	1	1	0	3	1	0	0	0	1	1	2	1	0	0	1	1
0	1	1	4	4	1	3	4	1	1	1	1	0	0	0	1	1	2	1	0	0	1	1
0	1	1	4	3	1	2	4	2	2	2	1	1	0	0	0	1	2	1	1	0	1	1
0	1	1	4	4	1	2	1	1	0	3	1	0	0	0	1	1	2	1	0	0	1	1
0	1	1	5	5	3	2	4	1	1	1	1	1	2	0	1	1	2	1	0	0	1	1
0	1	1	5	4	1	2	1	1	0	2	1	0	3	0	1	1	2	1	0	0	1	1
0	1	1	5	5	3	1	4	3	2	1	1	0	3	0	2	1	2	2	0	0	1	1
0	1	1	5	5	3	2	1	1	4	4	1	1	0	0	1	1	2	2	1	0	1	1
0	1	1	5	5	3	1	4	1	4	4	1	0	0	0	1	1	2	2	0	0	1	1
0	1	1	4	5	3	2	1	1	4	4	1	1	0	0	1	1	2	2	0	0	1	1
0	1	1	4	5	3	2	4	1	4	4	1	0	4	4	1	1	2	1	0	0	1	1
0	1	1	4	4	1	1	1	3	2	2	1	0	0	0	2	1	2	1	0	0	1	1
0	1	1	5	4	1	1	4	1	2	3	1	1	0	0	1	1	2	1	1	0	1	1
0	1	1	4	3	1	2	3	1	0	3	1	0	0	0	1	1	2	1	0	0	1	1
0	1	1	5	5	3	2	1	1	1	4	1	1	0	0	3	1	2	1	0	0	1	1
0	1	1	5	5	1	3	4	1	0	1	1	0	0	0	1	1	2	1	0	0	1	1
0	1	1	5	4	1	3	1	3	4	4	1	0	0	0	2	1	2	1	0	0	1	1
0	1	1	5	5	3	4	1	3	4	4	1	1	0	0	2	1	2	1	1	0	1	1
0	1	1	4	5	3	4	1	1	3	2	1	0	4	4	1	1	3	1	0	0	1	1
0	1	1	5	5	1	4	4	1	2	4	1	1	0	0	1	1	2	1	0	0	1	1
0	1	1	4	6	4	4	4	1	0	2	1	0	4	0	1	1	3	1	0	0	1	1
0	1	1	5	5	1	3	1	1	0	2	1	0	0	0	1	1	2	2	0	0	1	1
0	1	1	5	4	1	4	4	1	1	1	1	1	0	4	1	1	2	2	1	0	1	1
0	1	1	4	4	1	3	1	1	3	3	1	0	0	0	1	1	2	2	0	0	1	1
0	1	1	5	4	1	3	4	1	2	2	1	1	3	0	1	1	2	2	0	0	1	1
0	1	1	5	5	3	3	4	1	0	2	1	0	0	0	1	1	2	2	0	0	1	1
0	1	1	5	4	1	3	4	1	2	2	1	0	2	2	1	1	2	1	0	0	1	1
0	1	1	5	5	3	3	1	1	1	2	1	1	2	0	1	1	2	1	1	0	1	1
0	1	1	5	4	1	4	4	1	3	1	1	1	0	0	1	1	2	1	0	0	1	1
0	1	1	5	4	1	3	4	1	1	1	1	0	0	0	1	1	2	1	0	0	1	1
0	1	1	5	4	1	2	1	1	0	2	1	0	0	0	1	1	2	1	0	0	1	1
0	1	1	5	5	1	2	4	2	2	2	1	1	0	0	4	1	2	1	1	0	3	1
0	1	1	5	5	3	2	4	2	3	3	1	0	0	0	0	1	3	1	0	0	3	2
0	1	1	5	5	3	2	4	3	2	2	1	1	0	0	0	1	2	1	0	0	3	2
0	1	1	5	5	3	1	6	2	2	3	1	0	0	0	0	1	2	1	0	0	3	2
0	1	1	5	5	3	1	4	3	2	2	1	0	0	0	0	1	3	2	0	0	3	2
0	1	1	5	5	3	3	6	2	3	2	1	1	0	0	2	1	2	2	1	0	3	2
0	1	1	4	4	3	2	4	1	1	1	1	0	0	0	1	1	2	2	0	0	3	1
0	1	1	4	4	1	3	3	1	1	1	1	1	0	0	0	1	2	2	0	0	3	1
0	1	1	4	4	1	2	4	2	2	2	1	0	0	0	1	1	2	1	0	0	3	1
0	1	1	4	4	1	2	4	1	2	2	1	0	3	0	1	1	2	1	0	0	3	1
0	1	1	4	3	1	2	6	1	3	3	1	1	0	0	1	1	2	1	1	0	3	1
0	1	1	5	4	1	3	1	3	3	2	1	0	0	0	0	1	2	1	0	0	3	1
0	1	1	5	6	3	1	3	1	0	3	1	1	4	0	1	1	2	1	0	0	3	1
0	1	1	5	4	1	2	4	2	2	2	1	0	0	0	2	1	2	1	0	0	3	1
0	1	1	4	5	3	3	3	2	2	2	1	0	3	0	1	1	2	1	0	0	3	1
0	1	1	4	5	3	4	4	1	1	1	1	1	3	0	1	1	2	1	1	0	3	1
0	1	1	5	5	3	2	4	2	4	2	1	0	4	0	1	1	2	1	0	0	3	1
0	1	1	4	3	1	2	7	2	0	2	1	1	4	0	1	1	2	1	0	0	3	1
0	1	1	5	4	1	2	4	2	3	3	1	0	0	0	1	1	2	1	0	0	3	1
0	1	1	5	4	1	2	4	1	1	2	1	0	0	0	1	1	2	2	0	0	3	1
0	1	1	4	4	1	3	4	2	0	1	1	1	0	0	1	1	2	2	1	0	3	1
0	1	1	5	5	1	2	4	3	0	2	1	0	0	0	3	1	2	2	0	0	3	1
0	1	1	4	3	2	3	4	2	0	4	1	1	4	0	1	1	2	2	0	0	3	1
0	1	1	5	5	1	2	7	1	2	1	1	0	0	0	0	1	2	1	0	0	3	1
0	1	1	4	4	1	1	3	2	3	3	1	0	0	0	3	1	2	1	0	0	3	1
0	1	1	5	5	3	2	1	1	1	2	1	1	3	0	1	1	2	1	1	0	3	1
0	1	1	5	6	3	3	6	2	4	2	1	0	4	4	1	1	3	1	0	0	3	1
0	1	2	4	4	1	4	4	2	4	2	1	1	0	0	2	1	2	1	0	0	3	1
0	1	1	5	5	3	3	3	3	3	3	1	0	0	0	1	1	3	1	0	0	3	1
0	1	1	4	4	1	2	7	1	2	2	1	0	4	4	1	1	3	1	0	0	3	1
0	1	1	4	4	1	3	6	1	0	4	1	1	0	0	1	1	2	2	1	0	3	1
0	1	1	5	6	3	2	4	2	0	2	1	0	0	0	1	1	3	1	0	0	3	1
0	1	1	4	4	1	2	4	1	0	4	1	1	0	0	1	1	3	1	0	0	3	1
0	1	1	4	4	1	1	4	1	4	4	1	0	0	0	1	1	3	1	0	0	3	1
0	1	1	5	7	4	2	4	2	0	2	1	0	4	0	1	1	2	2	0	0	1	1
0	1	1	5	5	3	2	4	3	0	3	1	0	0	0	0	1	2	2	0	0	1	2
0	1	1	5	4	1	2	4	2	3	4	1	1	0	0	3	1	2	2	0	0	1	1
0	1	1	5	4	1	3	4	4	2	2	1	0	0	0	1	1	2	1	0	0	1	1
0	1	1	4	4	1	2	3	3	3	2	1	0	3	0	0	1	3	1	0	0	1	1
0	1	1	4	4	3	2	4	2	0	3	1	1	0	0	1	1	2	1	1	0	1	1
0	1	1	5	4	1	2	4	1	1	1	1	0	0	0	0	1	3	1	0	0	2	1
0	1	1	5	7	4	2	4	3	0	3	1	1	0	0	0	1	2	1	0	0	2	1
0	1	1	5	5	3	4	4	1	1	1	1	0	0	0	0	1	3	1	0	0	2	1
0	1	1	5	4	1	2	3	3	0	3	1	0	0	0	0	1	3	2	0	0	2	1
0	1	1	5	5	3	2	4	2	2	1	1	0	0	0	0	1	2	1	0	0	2	1
0	1	1	5	5	3	2	4	1	0	1	1	1	0	0	1	1	2	1	0	0	2	1
0	1	1	5	7	4	2	4	2	1	1	1	0	0	1	0	1	2	2	0	0	2	1
0	1	1	6	6	1	3	4	1	2	1	1	1	0	0	0	1	2	2	1	1	2	1
0	1	1	5	5	3	2	3	4	2	2	1	0	0	1	1	1	2	2	0	0	2	1
0	1	1	5	5	3	2	4	1	0	1	1	1	0	0	0	1	2	2	0	0	2	1
0	1	1	5	4	1	4	4	1	1	1	1	0	0	0	1	1	2	1	0	0	1	1
0	1	1	5	4	1	3	1	4	1	4	1	0	0	0	2	1	2	1	0	0	1	1
0	1	1	5	5	3	3	4	3	2	2	1	1	0	3	3	1	3	2	1	0	1	1
0	1	1	5	6	4	2	1	2	3	3	1	0	0	0	1	1	2	1	0	0	1	1
0	1	1	5	5	1	4	1	1	1	1	1	1	0	0	0	1	2	1	0	0	1	1
0	1	1	5	5	1	4	1	1	1	1	1	0	0	0	0	1	2	1	0	0	1	1
0	1	1	5	4	1	3	4	1	1	3	1	0	0	0	0	1	2	1	0	0	1	1
0	1	1	5	4	1	4	4	1	2	2	1	1	0	0	1	1	2	1	1	0	1	1
0	1	2	5	4	1	3	4	1	0	3	1	0	0	0	2	1	2	1	0	0	2	2
0	1	1	5	6	4	3	4	1	2	2	1	1	0	0	1	1	2	1	0	0	2	1
0	1	1	4	4	1	3	1	1	1	1	1	0	1	0	0	1	2	1	0	0	2	1
0	1	1	4	5	3	3	4	2	1	2	1	0	0	0	1	1	2	2	0	0	2	1
0	1	1	4	4	1	3	4	2	0	2	1	1	0	0	1	1	2	2	1	0	2	1
0	1	1	5	3	1	3	3	2	0	2	1	0	4	0	1	1	2	2	0	0	2	1
0	1	1	5	5	1	3	1	2	0	2	1	1	0	0	1	1	2	2	0	0	2	1
0	1	1	5	4	1	3	4	2	2	2	1	0	4	4	4	1	2	1	0	0	2	1
0	1	1	3	5	4	3	1	1	2	2	1	0	0	0	0	1	2	1	0	0	2	1
0	1	1	4	4	1	3	4	3	4	2	1	1	0	0	1	1	3	1	1	0	2	1
0	1	1	6	5	1	3	1	2	2	1	1	0	0	1	2	1	2	1	0	0	2	1
0	1	1	5	4	1	3	1	1	1	1	1	1	0	0	0	1	2	1	0	0	2	1
0	1	1	5	6	3	3	4	2	0	2	1	0	0	0	0	1	2	1	0	0	2	1
0	1	1	5	5	3	3	3	1	0	2	1	0	0	0	1	1	3	2	0	0	2	1
0	1	1	5	3	2	3	4	3	0	3	1	1	4	0	1	1	2	1	1	0	2	1
0	1	1	4	4	1	3	4	2	0	1	1	1	0	0	1	1	2	1	0	0	2	1
0	1	1	5	5	1	3	4	2	4	3	1	0	0	0	0	1	2	1	0	0	2	1
0	1	1	5	5	3	2	3	1	0	2	1	0	0	0	1	1	2	2	0	0	1	1
0	1	1	5	4	1	2	7	1	0	1	1	1	0	0	1	1	2	2	1	0	1	1
0	1	1	4	4	1	1	7	2	0	2	1	0	4	0	4	1	2	2	0	0	1	1
0	1	1	5	5	3	3	7	4	2	3	1	1	0	0	1	1	2	2	0	0	1	1
0	1	1	5	4	1	2	3	2	4	4	1	0	2	0	0	1	3	1	0	0	1	1
0	1	1	4	4	1	2	1	3	4	2	1	0	3	0	1	1	2	1	0	0	1	1
0	1	1	4	4	1	2	4	3	0	3	1	1	0	0	1	1	2	1	1	0	1	1
0	1	1	5	4	1	3	1	1	0	3	1	0	0	0	1	1	2	1	0	0	1	1
0	1	1	4	5	3	1	1	4	4	2	1	1	0	0	1	1	2	1	0	0	1	1
0	1	1	4	3	1	2	4	2	3	2	1	0	4	0	2	1	3	1	0	0	1	1
0	1	1	5	4	1	3	4	3	4	4	1	0	4	0	2	1	2	1	0	0	1	1
0	1	1	5	5	1	2	4	3	4	4	1	1	3	0	3	1	2	1	1	0	1	1
0	1	1	4	3	2	1	4	1	0	2	1	0	0	0	0	0	2	1	0	0	1	1
0	1	1	5	4	1	3	4	1	0	2	1	1	0	0	1	1	2	1	0	0	1	1
0	1	1	4	4	1	2	3	1	0	2	1	0	0	0	1	1	3	2	0	0	1	1
0	1	1	6	5	1	2	4	2	0	3	1	1	0	0	1	1	2	2	1	0	1	1
0	1	1	5	4	1	2	4	1	0	3	1	0	4	4	1	1	2	2	0	0	1	1
0	1	1	4	3	1	2	4	1	0	2	1	1	0	0	4	1	2	2	0	0	1	1
0	1	1	5	4	1	3	1	3	3	1	1	0	4	0	1	1	2	1	0	0	1	1
0	1	1	5	5	1	3	3	3	2	2	1	0	4	4	3	1	2	1	0	0	1	1
0	1	1	5	5	1	1	4	1	0	2	1	1	2	0	1	1	2	1	1	0	1	1
0	1	1	4	4	1	2	4	1	2	2	1	0	2	0	1	1	2	1	0	0	1	1
0	1	1	5	4	1	2	1	1	0	2	1	1	2	0	1	1	2	1	0	0	1	1
0	1	1	4	4	1	2	1	1	0	4	1	0	0	0	1	1	3	1	0	0	1	1
0	1	1	5	4	1	1	1	1	0	2	1	0	0	0	1	1	2	1	0	0	1	1
0	1	1	4	3	2	1	3	1	3	3	1	1	0	0	1	1	2	1	1	0	1	1
0	1	1	4	4	1	4	7	4	1	3	1	0	0	0	1	1	2	1	0	0	1	1
0	1	1	5	6	3	2	7	1	0	3	1	0	0	0	4	0	3	1	0	0	1	1
0	1	1	5	3	1	2	4	1	0	3	1	0	0	0	1	1	3	2	0	0	1	1
0	1	1	5	4	1	2	1	3	3	4	1	1	3	4	4	1	2	2	1	0	1	1
0	1	1	5	5	3	2	1	1	4	3	1	0	0	0	0	1	2	2	0	0	1	1
0	1	1	5	4	1	2	1	3	4	3	1	1	0	0	1	1	2	2	0	0	1	1
0	1	1	5	3	2	2	4	2	2	3	1	0	0	0	3	1	2	1	0	0	1	1
0	1	1	4	3	1	3	1	1	0	2	1	0	4	0	1	1	2	1	0	0	1	1
0	1	1	5	3	1	2	1	1	2	2	1	1	0	0	1	1	2	1	1	0	1	1
0	1	1	4	6	4	2	4	1	4	1	1	0	0	0	1	1	2	1	0	0	1	1
0	1	1	5	4	1	2	3	1	0	2	1	1	0	0	1	1	2	1	0	0	1	1
0	1	1	5	5	3	1	1	4	0	3	1	0	0	0	1	1	2	1	0	0	1	1
0	1	1	5	4	1	3	1	1	4	1	1	1	3	0	1	1	2	1	1	0	1	1
0	1	1	4	3	1	2	1	4	0	2	1	0	0	0	1	1	2	1	0	0	1	1
0	1	1	5	5	3	3	1	3	3	2	1	1	2	0	1	1	2	1	0	0	1	1
0	1	1	4	4	1	1	4	3	4	3	1	0	3	0	0	1	2	1	0	0	1	1
0	1	1	4	5	3	2	1	1	4	4	1	0	0	0	1	1	2	2	0	0	1	1
0	1	1	5	5	1	2	7	1	1	1	1	1	0	1	1	1	2	2	1	0	1	1
0	1	1	4	3	1	2	4	1	0	3	1	0	0	0	1	1	2	2	0	0	1	1
0	1	1	4	4	1	2	1	1	4	3	1	1	3	0	1	1	3	2	0	0	1	1
0	1	1	5	4	1	3	4	1	1	2	1	0	0	0	0	1	2	1	1	0	1	1
0	1	1	4	4	1	3	4	2	1	2	1	0	0	0	1	1	2	1	0	0	1	1
0	1	1	5	4	1	3	1	1	2	2	1	1	4	4	1	1	2	1	1	0	1	1
0	1	1	4	4	1	3	4	2	0	2	1	0	0	0	1	1	2	1	0	0	1	1
0	1	1	5	5	1	1	1	1	3	3	1	1	0	0	2	1	2	1	0	0	1	1
0	1	1	5	4	1	4	4	2	1	2	1	0	0	0	3	1	3	1	1	0	1	1
0	1	1	5	5	1	2	4	1	2	2	1	0	0	0	1	1	2	1	0	0	1	1
0	1	1	4	4	3	4	1	1	2	2	1	1	0	0	1	1	3	1	1	0	1	1
0	1	1	5	4	1	1	1	2	3	2	1	0	0	0	0	1	2	1	0	0	1	1
0	1	1	4	4	1	3	1	1	3	2	1	1	3	0	1	1	2	1	0	0	1	1
0	1	1	3	4	3	2	4	1	0	3	1	0	0	0	1	1	2	1	0	0	1	1
0	1	1	5	4	1	1	1	1	1	1	1	0	0	0	1	1	2	2	0	0	1	1
0	1	1	4	4	1	3	4	2	0	2	1	1	4	0	1	1	2	2	1	0	1	1
0	1	1	4	4	1	2	4	2	0	4	1	0	4	0	2	1	2	2	0	0	1	1
0	1	1	5	6	3	4	4	1	0	1	1	1	0	0	1	1	2	2	1	0	1	1
0	1	1	5	4	1	2	4	1	3	1	1	0	0	0	1	1	2	1	0	0	1	1
0	1	1	5	6	3	2	4	2	0	2	1	0	0	0	1	1	2	1	1	0	1	1
0	1	1	5	4	1	4	4	2	3	2	1	1	0	0	1	1	2	1	1	0	1	1
0	1	1	4	4	1	3	4	1	0	2	1	0	0	0	1	1	2	1	0	0	1	1
0	1	1	5	3	2	2	1	1	2	2	1	1	4	0	1	1	2	1	0	0	1	1
0	1	1	5	4	1	1	4	1	3	2	1	0	0	0	1	1	2	1	0	0	1	1
0	1	1	4	4	1	2	4	2	0	2	1	0	3	0	1	1	3	1	0	0	1	1
0	1	1	5	4	1	2	6	1	0	3	1	1	0	0	1	1	2	1	1	0	3	1
0	1	1	5	4	1	2	4	3	0	3	1	0	0	0	0	1	2	1	0	0	3	1
0	1	1	5	5	3	2	4	2	3	2	1	1	0	0	2	1	2	1	0	0	3	2
0	1	1	5	4	1	1	3	2	3	2	1	0	0	0	1	1	3	2	0	0	3	1
0	1	1	5	5	1	3	4	1	4	3	1	1	0	0	1	1	3	2	1	0	3	1
0	1	1	5	4	1	2	7	2	0	1	1	0	0	0	2	1	3	2	0	0	3	1
0	1	1	4	3	1	2	4	1	3	3	1	1	0	0	1	1	2	2	0	0	3	1
0	1	1	5	4	1	3	3	1	2	2	1	0	3	3	1	1	2	1	0	0	3	1
0	1	1	5	4	1	1	3	2	3	2	1	0	0	0	2	1	2	1	0	0	3	1
0	1	1	5	4	1	2	4	2	1	3	1	1	4	0	0	1	2	1	1	0	3	1
0	1	1	4	5	3	2	4	2	0	3	1	0	0	0	0	1	2	1	0	0	3	1
0	1	1	4	4	1	2	6	1	1	4	1	1	0	0	1	1	2	1	0	0	3	1
0	1	1	5	3	1	3	3	2	3	3	1	0	4	0	0	1	2	1	0	0	3	1
0	1	1	4	4	1	2	6	1	0	1	1	0	0	0	1	1	2	1	0	0	3	1
0	1	1	5	4	1	2	4	2	1	2	1	1	4	0	0	1	2	1	1	0	3	1
0	1	1	6	5	1	2	1	2	2	0	1	0	0	0	1	1	2	1	0	0	3	1
0	1	1	6	5	1	2	1	1	2	2	1	1	2	0	0	1	2	1	0	0	3	1
0	1	1	5	4	1	3	1	1	3	3	1	0	4	0	1	1	2	1	0	0	3	1
0	1	1	6	5	1	2	3	1	1	1	1	0	2	0	0	1	2	2	0	0	3	1
0	1	1	4	4	1	1	7	3	3	3	1	1	0	3	2	1	2	2	1	0	3	1
0	1	1	5	6	3	3	3	3	3	2	1	0	4	0	1	1	2	2	0	0	3	1
0	1	1	5	4	1	2	1	1	1	2	1	1	4	0	1	1	2	2	0	0	3	1
0	1	1	6	3	2	1	1	1	2	3	1	0	0	0	0	1	2	1	0	0	3	1
0	1	1	4	4	3	1	4	1	1	1	1	0	0	0	1	1	2	1	0	1	3	1
0	1	1	5	5	1	2	4	4	4	4	1	1	0	0	1	1	2	1	1	0	3	1
0	1	1	5	5	3	3	4	2	0	1	1	0	0	0	1	1	2	1	0	0	3	1
0	1	1	4	5	3	4	1	3	4	2	1	1	0	0	1	1	2	1	0	1	3	1
0	1	1	5	4	1	2	6	1	2	3	1	0	0	0	1	1	3	1	0	0	3	1
0	1	1	5	5	3	2	4	1	1	2	0	1	4	0	1	1	2	1	0	0	1	1
0	1	1	5	5	1	2	4	2	4	1	0	1	0	0	3	1	2	1	1	1	1	1
0	1	1	5	4	1	3	4	3	2	1	0	0	0	0	0	1	3	1	0	0	1	1
0	1	1	5	6	3	2	4	1	0	1	0	1	0	0	4	1	2	1	0	0	1	1
0	1	1	5	6	3	3	4	1	1	1	0	0	0	0	1	1	2	1	0	0	1	1
0	1	1	5	5	3	2	4	1	0	2	0	0	0	0	1	1	2	1	0	0	1	1
0	1	1	4	6	4	2	4	4	0	1	0	0	0	0	1	1	3	1	0	0	1	1
0	1	1	4	5	3	2	4	1	0	1	0	1	0	0	1	1	2	2	1	0	1	1
0	1	1	5	6	3	2	4	1	0	1	0	0	0	0	0	1	2	2	0	0	1	2
0	1	1	4	3	1	1	3	1	1	1	0	0	0	0	0	1	3	1	0	0	1	2
0	1	1	5	4	1	1	4	2	0	4	0	0	4	0	0	1	3	1	0	0	1	2
0	1	1	5	6	3	2	4	1	0	1	0	0	0	0	0	1	2	1	0	0	1	2
0	1	1	5	4	1	1	4	1	1	1	0	0	4	0	1	1	3	2	0	0	1	2
0	1	1	5	5	3	1	4	2	0	1	0	0	0	0	1	1	3	2	0	0	1	2
0	1	1	4	5	3	1	4	2	0	1	0	0	4	0	0	1	2	1	0	0	1	2
0	1	1	5	4	1	1	4	1	2	2	0	1	3	0	2	1	2	1	0	0	1	2
0	1	1	5	5	3	3	1	3	1	2	0	1	0	0	0	1	2	2	0	0	1	1
0	1	1	5	5	3	2	4	3	3	1	0	1	4	0	0	1	2	1	1	0	1	1
0	1	1	4	6	4	2	7	1	0	1	0	1	0	0	0	1	2	1	0	0	1	1
0	1	1	4	4	1	3	1	2	0	1	0	0	0	0	2	1	2	1	0	0	1	1
0	1	1	6	6	3	3	4	1	0	1	0	0	0	0	1	1	2	1	0	0	1	1
0	1	1	5	5	3	3	4	2	2	2	0	0	0	0	0	1	2	2	0	0	1	1
0	1	1	5	5	3	2	3	2	0	2	0	1	0	0	0	1	2	1	1	0	1	1
0	1	2	5	5	3	2	3	2	0	2	0	0	4	0	0	1	3	1	0	0	1	1
0	1	1	5	5	1	3	4	3	3	3	0	0	3	0	3	1	2	2	1	1	2	1
0	1	1	5	7	4	3	4	1	1	2	0	0	0	0	1	1	3	2	0	0	2	1
0	1	1	5	5	1	2	3	3	4	2	0	0	0	0	1	1	3	1	0	0	2	1
0	1	1	5	5	3	1	6	2	1	1	0	0	0	0	1	1	2	2	0	0	2	1
0	1	1	5	4	1	3	4	1	1	1	0	1	2	0	0	1	2	1	1	0	2	1
0	1	1	5	5	3	4	1	1	0	1	0	1	4	0	1	1	2	2	1	0	2	1
0	1	1	5	6	3	2	4	3	0	3	0	1	3	0	0	1	2	1	0	0	2	1
0	1	1	5	5	3	2	4	2	0	2	0	1	0	0	0	1	2	1	0	0	2	1
0	1	1	6	5	1	3	4	3	0	1	0	1	0	0	0	1	2	2	1	0	2	1
0	1	1	6	6	3	3	4	1	2	1	0	1	2	0	0	1	2	2	0	0	2	1
0	1	1	5	7	4	4	7	3	0	1	0	1	0	0	0	1	3	2	1	0	2	1
0	1	1	5	7	4	2	4	2	2	2	0	1	0	0	0	1	2	2	0	0	2	1
0	1	1	4	4	3	2	4	1	1	2	0	1	0	0	0	1	2	1	1	0	2	1
0	1	1	4	5	3	2	4	3	0	3	0	0	0	0	0	1	3	1	0	0	2	1
0	1	1	4	3	1	3	4	2	3	3	0	1	0	0	3	1	2	1	0	0	2	1
0	1	1	4	5	3	3	1	3	0	3	0	0	0	0	0	1	2	2	0	0	2	1
0	1	1	6	7	4	3	4	3	1	2	0	1	4	0	0	1	2	1	1	0	2	1
0	1	1	5	4	1	2	4	2	3	2	0	1	0	0	0	1	2	1	0	0	2	1
0	1	1	5	5	3	1	3	1	0	2	0	0	0	0	1	1	3	1	0	0	2	1
0	1	1	4	4	1	1	6	1	1	2	0	1	0	0	0	1	2	1	1	0	2	1
0	1	1	4	4	3	2	3	2	0	2	0	0	0	0	0	1	2	2	0	0	2	1
0	1	1	5	5	3	2	4	4	4	3	0	1	0	0	0	1	2	2	0	0	2	1
0	1	1	4	5	3	2	4	1	3	1	0	1	3	0	0	1	2	1	1	0	2	1
0	1	1	4	3	2	1	4	3	3	1	0	0	0	0	3	1	2	1	0	0	2	2
0	1	1	4	4	1	2	4	1	0	1	0	0	0	0	0	1	2	1	0	0	2	2
0	1	1	6	6	3	3	4	2	1	1	0	1	2	0	0	1	2	2	0	0	2	2
0	1	1	4	4	1	2	4	1	0	1	0	0	0	0	2	1	2	2	0	0	2	2
0	1	1	4	6	4	4	4	2	1	1	0	0	3	0	2	1	2	1	0	0	2	2
0	1	1	4	4	3	2	6	2	0	2	0	0	0	0	0	1	2	1	0	0	2	2
0	1	1	5	5	1	3	4	1	0	1	0	0	0	0	1	1	2	2	0	0	2	2
0	1	1	5	6	3	4	4	2	0	2	0	0	0	0	0	1	2	2	0	0	2	1
0	1	1	6	4	1	2	6	1	0	1	0	0	0	0	0	1	2	1	0	0	2	1
0	1	1	5	5	3	3	3	2	0	1	0	0	0	0	0	1	2	1	0	0	2	1
0	1	1	5	5	1	3	4	2	1	2	0	1	2	0	0	1	2	1	1	0	2	1
0	1	1	6	7	3	2	4	1	2	1	0	1	2	2	2	1	2	1	0	0	2	1
0	1	1	4	6	4	3	4	2	0	1	0	0	2	2	2	1	2	1	0	0	2	1
0	1	1	5	3	2	2	4	1	1	1	0	1	0	0	1	1	2	2	1	0	2	1
0	1	1	4	5	3	3	4	2	0	2	0	0	0	0	0	1	2	2	0	0	2	1
0	1	1	4	5	3	2	4	1	2	3	0	1	0	0	0	1	2	1	1	0	2	1
0	1	1	5	4	1	1	4	1	2	2	0	0	0	0	0	1	2	1	0	0	2	1
0	1	1	5	5	3	2	3	2	0	2	0	0	0	0	0	1	2	2	0	0	2	1
0	1	1	5	5	1	4	4	1	1	2	0	1	3	0	1	1	2	1	1	0	2	1
0	1	1	4	4	1	2	4	1	2	3	0	1	0	0	0	1	2	1	0	0	2	1
0	1	1	5	5	1	3	4	2	1	2	0	0	0	0	3	1	2	1	0	0	2	1
0	1	1	5	4	1	2	4	3	0	2	0	0	0	0	0	1	2	2	0	0	2	1
0	1	1	5	4	1	2	4	2	0	1	0	1	0	0	0	1	2	1	1	0	2	1
0	1	1	5	6	3	2	4	1	1	2	0	1	4	4	4	1	2	2	0	0	2	1
0	1	1	5	5	1	2	1	1	1	2	0	0	3	0	0	1	2	1	0	0	1	1
0	1	1	4	5	4	1	4	1	0	2	0	1	3	0	1	1	2	1	1	0	1	1
0	1	1	5	6	3	1	1	3	3	3	0	0	0	0	1	1	3	1	0	0	1	1
0	1	1	5	5	3	1	1	2	2	2	0	1	0	0	0	1	2	2	1	0	1	1
0	1	1	5	4	1	3	1	1	0	1	0	0	0	0	0	1	2	2	0	0	1	1
0	1	1	5	5	1	4	1	1	1	1	0	0	0	0	0	1	2	2	0	0	1	1
0	1	1	5	5	1	3	4	2	2	2	0	1	0	0	2	1	2	1	1	0	1	1
0	1	1	5	5	1	3	6	3	0	3	0	1	0	0	0	1	2	2	1	0	1	1
0	1	1	5	6	3	2	3	3	3	3	0	0	4	4	1	1	2	1	0	0	1	1
0	1	1	5	5	1	3	1	2	2	2	0	1	0	0	1	1	3	1	1	1	1	1
0	1	1	4	4	1	3	6	3	2	3	0	1	0	0	1	1	2	1	1	0	1	1
0	1	1	5	5	1	1	4	2	2	2	0	0	0	0	1	1	3	1	0	0	1	1
0	1	1	6	7	3	3	4	1	0	1	0	0	0	0	1	1	2	2	0	0	1	1
0	1	1	5	5	3	3	3	2	1	2	0	0	0	0	0	1	2	1	0	0	1	1
0	1	1	5	5	3	3	3	1	2	1	0	0	0	0	0	1	2	2	0	1	1	1
0	1	1	3	3	1	3	3	1	0	2	0	0	0	1	1	1	2	1	0	1	2	2
0	1	1	5	4	1	3	4	3	2	3	0	0	3	0	0	1	2	1	0	0	2	2
0	1	1	5	3	2	3	4	1	0	1	0	0	2	0	2	1	2	1	0	0	2	2
0	1	2	5	6	3	3	1	2	0	3	0	1	0	0	0	1	2	1	1	0	2	2
0	1	2	4	4	3	3	4	2	0	0	0	0	0	0	1	1	2	1	0	0	2	2
0	1	1	5	5	1	3	4	2	3	2	0	0	3	0	2	1	2	1	0	0	2	2
0	1	1	4	4	1	3	4	2	3	4	0	0	0	0	0	1	2	2	0	0	2	1
0	1	1	5	4	1	3	1	3	0	4	0	1	0	0	0	1	3	1	1	0	2	1
0	1	1	5	5	3	3	1	1	0	1	0	0	0	0	0	1	2	1	0	0	2	1
0	1	1	5	4	1	3	1	3	0	2	0	0	0	0	0	1	2	1	0	0	2	1
0	1	1	5	5	3	3	1	1	2	1	0	0	0	0	1	1	2	2	0	0	2	1
0	1	1	5	5	1	3	4	1	0	1	0	0	2	2	1	1	2	2	0	0	2	1
0	1	1	4	4	3	3	1	1	1	1	0	1	2	0	1	1	2	2	0	0	2	1
0	1	1	6	5	1	3	3	1	1	4	0	0	0	0	0	1	3	1	0	0	2	1
0	1	1	5	5	1	3	4	2	1	1	0	0	4	4	1	1	2	1	0	0	2	1
0	1	1	5	5	1	3	1	1	0	1	0	0	3	0	1	1	2	1	0	0	2	1
0	1	1	5	4	1	3	4	2	4	2	0	0	4	0	0	1	2	1	0	0	2	1
0	1	1	5	4	1	3	4	2	3	1	0	0	4	0	0	1	2	2	0	0	2	1
0	1	1	2	3	1	3	1	3	0	3	0	1	0	0	1	1	2	2	0	0	2	1
0	1	1	5	5	1	3	4	2	2	3	0	0	0	0	0	1	2	1	0	0	2	1
0	1	1	5	5	3	3	4	2	2	2	0	0	0	0	3	1	2	1	0	0	2	1
0	1	1	5	4	1	3	4	2	2	2	0	1	0	0	2	1	2	1	0	0	2	1
0	1	1	4	3	1	3	6	2	1	1	0	0	0	0	0	1	2	1	0	0	2	1
0	1	1	5	5	3	3	4	2	0	2	0	0	0	0	0	1	2	2	0	0	2	1
0	1	1	5	4	1	3	1	1	2	1	0	1	0	0	0	1	2	2	0	0	2	1
0	1	1	5	6	4	3	1	1	0	2	0	0	0	0	1	1	2	1	0	1	2	1
0	1	1	3	3	1	3	4	3	0	2	0	1	0	0	0	1	2	1	1	0	2	1
0	1	1	6	5	1	3	4	2	2	2	0	1	0	3	1	1	3	1	0	0	2	1
0	1	1	4	4	1	3	1	1	3	3	0	0	2	0	0	1	2	2	0	0	2	1
0	1	1	5	4	1	3	4	1	4	2	0	0	4	0	4	1	2	2	0	0	2	1
0	1	1	5	5	1	3	4	2	4	2	0	1	4	0	4	1	2	2	0	0	2	1
0	1	1	5	5	3	3	4	1	0	2	0	1	0	0	0	1	2	1	1	0	2	1
0	1	1	5	4	1	3	4	2	2	3	0	0	1	0	2	1	2	2	0	0	2	1
0	1	1	5	5	3	3	7	2	2	2	0	1	0	0	0	1	2	2	1	0	2	1
0	1	1	4	5	3	3	1	1	3	2	0	0	0	0	1	1	2	1	0	0	2	1
0	1	1	5	5	3	3	4	2	4	4	0	1	0	0	1	1	2	2	0	0	2	1
0	1	1	5	6	3	3	1	2	0	2	0	0	0	0	2	1	2	1	0	0	2	1
0	1	1	5	6	3	3	1	2	0	3	0	1	0	0	4	1	2	1	1	0	2	1
0	1	1	3	5	4	3	4	2	0	0	0	0	0	0	3	1	3	1	0	0	2	1
0	1	1	4	3	2	3	4	1	0	2	0	0	0	0	1	1	2	1	0	0	2	1
0	1	1	5	5	3	3	3	2	0	2	0	0	0	0	0	1	2	2	0	0	2	1
0	1	1	5	4	1	3	1	1	1	1	0	0	2	0	1	1	2	1	0	0	2	1
0	1	1	5	5	1	3	1	1	3	3	0	0	0	0	0	1	2	1	0	0	2	1
0	1	1	5	7	4	3	4	1	3	2	0	0	0	0	0	1	2	1	0	0	2	1
0	1	1	5	4	1	3	4	2	0	1	0	1	0	0	1	1	2	2	0	0	2	1
0	1	1	5	5	1	3	4	1	0	3	0	0	4	4	3	1	2	1	0	0	2	1
0	1	1	4	3	1	3	4	4	2	0	0	0	3	0	2	1	2	1	0	0	2	1
0	1	1	5	4	1	3	4	1	2	4	0	1	0	0	3	1	2	1	0	0	2	1
0	1	1	4	4	1	3	1	1	2	3	0	0	4	4	3	1	3	1	0	0	2	1
0	1	1	4	4	1	3	4	1	0	2	0	0	0	0	0	1	3	1	0	0	2	1
0	1	1	5	4	1	3	7	2	0	2	0	0	0	0	0	1	3	1	0	0	2	1
0	1	1	5	5	3	3	7	2	0	2	0	1	0	0	0	1	2	1	1	0	2	1
0	1	1	6	6	3	3	1	2	0	2	0	1	4	0	3	1	2	1	0	0	2	1
0	1	1	5	4	1	3	1	2	0	2	0	0	0	0	0	1	2	1	0	0	2	1
0	1	1	5	4	1	3	7	1	0	2	0	1	4	0	1	1	2	1	0	0	2	1
0	1	1	4	5	3	3	4	1	0	2	0	1	2	0	0	1	2	2	0	0	2	1
0	1	1	5	4	1	3	4	2	0	2	0	0	3	0	2	1	2	1	0	0	2	1
0	1	1	5	4	1	3	4	2	4	2	0	1	4	3	2	1	3	1	0	0	2	1
0	1	1	4	3	1	3	6	3	2	2	0	1	0	0	2	1	2	1	0	0	2	1
0	1	1	5	6	3	3	4	2	0	2	0	0	2	0	1	1	2	1	0	0	2	1
0	1	1	4	6	4	3	1	1	0	2	0	0	0	0	1	1	2	2	0	0	2	1
0	1	1	5	4	1	3	1	1	0	2	0	1	4	0	4	1	2	1	1	0	2	1
0	1	1	5	4	1	3	1	2	0	2	0	1	3	0	0	1	2	1	0	0	2	1
0	1	1	4	4	3	3	3	1	2	1	0	0	0	0	0	1	2	2	0	0	2	1
0	1	1	4	4	3	3	6	1	0	2	0	0	0	0	1	1	2	1	0	0	2	1
0	1	1	5	3	2	3	1	3	2	2	0	1	1	2	3	1	2	1	0	0	2	1
0	1	1	5	5	3	3	4	1	1	1	0	0	0	0	0	1	3	1	0	0	2	1
0	1	1	4	5	3	3	4	1	2	2	0	1	2	0	2	1	2	2	1	0	2	1
0	1	1	5	4	1	3	1	1	1	1	0	1	2	0	0	1	2	1	0	0	2	1
0	1	1	1	4	3	3	1	1	1	1	0	0	0	0	0	1	2	1	0	0	2	1
0	1	1	4	5	3	3	4	2	2	2	0	1	2	0	1	1	2	2	0	0	2	1
0	1	1	5	5	1	3	1	1	1	1	0	0	0	0	1	1	2	1	0	0	2	1
0	1	1	5	3	2	3	4	4	0	2	0	0	3	3	2	1	2	2	0	0	2	1
0	1	1	5	4	1	3	1	3	1	2	0	1	0	0	3	1	3	1	0	0	2	1
0	1	1	5	3	2	3	6	1	1	1	0	1	3	3	2	1	2	2	1	0	2	1
0	1	1	5	4	1	3	3	2	2	2	0	1	0	0	2	1	2	1	0	0	2	1
0	1	1	5	5	3	3	1	1	1	1	0	0	3	0	2	1	2	1	0	0	2	1
0	1	1	5	5	1	3	4	1	1	1	0	1	1	1	1	1	2	2	1	0	2	1
0	1	1	5	4	1	3	3	3	3	3	0	1	3	0	3	1	2	2	0	0	2	1
0	1	1	6	7	3	3	4	2	2	2	0	0	0	0	2	1	2	1	0	0	2	1
0	1	1	3	3	1	3	6	1	3	3	0	0	2	0	1	1	3	1	0	0	2	1
0	1	1	5	4	1	3	4	2	4	2	0	0	0	0	0	1	2	1	0	0	2	1
0	1	1	4	4	1	3	4	1	0	2	0	0	4	0	1	1	2	1	0	0	2	1
0	1	1	4	6	4	2	4	1	0	2	0	1	0	0	1	1	2	2	0	0	1	1
0	1	1	4	4	1	2	4	2	4	2	0	0	4	0	2	1	2	1	0	0	1	1
0	1	1	4	4	1	3	7	3	3	2	0	1	4	0	3	1	3	1	1	0	1	1
0	1	1	4	3	1	2	4	1	3	2	0	1	4	0	1	1	3	1	0	0	1	1
0	1	1	5	4	1	1	3	2	0	2	0	0	4	0	2	1	3	1	0	0	1	1
0	1	1	5	4	1	4	4	1	3	2	0	0	3	3	1	1	3	2	0	0	1	1
0	1	1	5	5	3	3	4	1	2	1	0	0	2	0	1	1	2	1	0	0	1	1
0	1	1	5	4	1	2	7	1	0	1	0	0	0	0	1	1	2	1	0	0	1	1
0	1	1	5	6	3	2	1	2	0	3	0	0	2	0	1	1	2	1	0	0	1	1
0	1	1	4	4	3	2	4	3	0	1	0	0	0	0	4	1	3	2	0	0	1	1
0	1	1	5	4	1	2	1	3	0	4	0	1	0	0	2	1	2	1	0	0	1	1
0	1	1	5	4	1	2	3	3	4	4	0	0	0	0	2	1	2	1	0	0	1	1
0	1	1	4	5	3	2	3	1	2	3	0	1	0	0	1	1	2	1	1	0	1	1
0	1	1	5	4	1	2	4	1	4	4	0	0	4	0	0	1	2	1	0	0	1	1
0	1	1	4	3	1	2	4	2	0	0	0	0	2	0	3	1	2	1	0	0	1	1
0	1	1	4	3	1	3	1	2	0	4	0	1	0	0	1	1	2	1	0	0	1	1
0	1	1	3	3	1	2	7	2	0	4	0	0	0	0	0	1	2	1	0	0	1	1
0	1	1	4	4	1	2	3	2	0	2	0	0	3	0	1	1	2	2	0	0	1	1
0	1	1	5	7	4	2	1	3	3	2	0	0	4	0	1	1	3	1	0	0	1	1
0	1	1	5	7	4	3	1	1	0	1	0	0	4	0	3	1	2	1	0	0	1	1
0	1	1	4	3	1	2	4	2	3	1	0	1	0	0	0	1	2	1	0	0	1	1
0	1	1	4	4	3	1	4	2	3	3	0	0	0	4	1	1	2	1	0	0	1	1
0	1	1	5	4	1	2	4	2	2	2	0	0	0	0	1	1	2	2	0	0	1	1
0	1	1	5	4	1	2	4	3	4	4	0	1	4	0	2	1	2	2	0	0	1	1
0	1	1	5	4	1	2	4	4	4	3	0	1	3	2	3	1	3	1	1	0	1	1
0	1	1	5	5	3	2	3	1	2	2	0	0	4	0	1	1	2	1	0	0	1	1
0	1	1	5	5	3	3	4	1	0	3	0	0	0	0	1	1	2	1	0	0	1	1
0	1	1	5	4	1	3	1	1	3	1	0	0	0	0	1	1	2	1	0	0	1	1
0	1	1	5	3	1	2	4	1	3	2	0	1	3	0	0	1	2	1	1	0	1	1
0	1	1	4	3	1	3	3	1	3	2	0	0	3	0	1	1	2	1	0	0	1	1
0	1	1	4	6	4	2	1	1	4	2	0	0	4	0	1	1	3	2	0	0	1	1
0	1	1	4	5	3	3	4	3	2	2	0	1	3	0	2	1	2	2	1	0	1	1
0	1	1	4	4	1	1	3	1	3	2	0	1	0	0	1	1	2	1	1	0	1	1
0	1	1	4	3	1	2	1	1	0	1	0	1	0	0	1	1	2	1	0	0	1	1
0	1	1	5	4	1	1	1	2	0	2	0	1	0	0	1	1	2	1	0	0	1	1
0	1	1	5	4	1	2	7	1	0	2	0	1	0	0	1	1	2	2	1	0	1	1
0	1	1	4	5	3	4	1	1	0	2	0	1	0	0	0	1	2	2	0	0	1	1
0	1	1	5	3	1	3	1	1	0	2	0	1	0	0	1	0	2	1	1	0	1	1
0	1	1	4	4	1	1	4	1	0	2	0	0	0	0	1	0	2	1	0	0	1	1
0	1	1	4	3	1	3	1	1	0	2	0	1	0	0	1	0	2	1	1	0	1	1
0	1	1	5	5	1	4	1	1	0	2	0	1	0	0	1	0	2	1	0	0	1	1
0	1	1	4	5	3	2	4	1	0	2	0	0	0	0	1	1	2	1	0	0	1	1
0	1	1	4	6	4	2	1	1	0	2	0	0	0	0	1	1	2	1	0	0	1	1
0	1	1	5	3	1	2	1	1	1	2	0	1	0	0	1	1	2	1	0	0	1	1
0	1	1	3	3	1	1	3	1	1	1	0	1	0	0	0	1	2	2	1	0	1	1
0	1	1	4	4	3	4	7	2	0	4	0	0	0	0	0	1	3	1	0	0	1	1
0	1	1	5	4	1	2	4	1	2	2	0	0	4	4	4	1	2	1	0	0	1	1
0	1	1	4	4	3	2	7	1	0	1	0	0	0	0	0	1	3	1	0	0	1	1
0	1	1	4	3	1	2	1	1	2	2	0	0	0	0	1	1	2	1	0	1	1	1
0	1	1	4	4	1	2	3	1	0	2	0	0	0	0	1	1	3	1	0	0	1	1
0	1	1	4	4	1	1	3	1	0	2	0	1	0	0	1	1	2	2	1	0	1	1
0	1	1	5	4	1	3	1	1	4	2	0	1	0	0	1	0	2	2	0	0	1	1
0	1	1	4	4	1	1	1	1	0	1	0	1	0	0	1	1	2	1	1	0	1	1
0	1	1	5	5	3	2	1	3	3	2	0	0	4	0	2	1	2	1	0	0	1	1
0	1	1	5	4	1	3	1	2	4	4	0	0	4	4	1	1	2	1	0	0	1	1
0	1	1	5	5	1	3	1	3	4	3	0	1	3	0	1	1	2	1	1	0	1	1
0	1	1	4	4	1	2	1	3	1	1	0	0	3	0	3	1	2	2	0	0	1	1
0	1	1	5	4	1	2	4	2	3	2	0	0	3	0	1	1	2	1	0	1	1	1
0	1	1	4	4	1	4	3	1	3	2	0	0	2	4	1	1	2	2	0	0	1	1
0	1	1	4	4	1	1	4	1	0	2	0	1	0	0	0	1	2	2	0	0	1	1
0	1	1	5	5	1	2	1	1	0	2	0	1	2	0	1	1	2	1	1	0	1	1
0	1	1	4	3	1	2	4	1	0	2	0	1	2	0	1	1	2	1	0	0	1	1
0	1	1	4	4	1	2	4	1	0	2	0	0	2	0	0	1	2	1	0	0	1	1
0	1	1	4	4	1	2	4	1	0	2	0	0	0	0	1	1	2	1	0	0	1	1
0	1	1	3	3	1	2	4	1	1	2	0	0	0	0	1	1	2	2	0	0	1	1
0	1	1	4	4	1	1	4	1	0	2	0	0	0	0	1	0	2	1	0	0	1	1
0	1	1	4	4	1	2	7	1	0	2	0	0	0	0	1	0	2	1	0	0	1	1
0	1	1	4	5	3	2	4	4	2	2	0	0	0	0	1	0	2	1	0	0	1	1
0	1	1	4	3	2	2	1	1	0	3	0	1	0	0	1	0	2	1	1	0	1	1
0	1	1	3	4	3	2	4	1	3	2	0	0	0	0	1	0	2	2	0	0	1	1
0	1	1	4	5	3	2	1	1	2	2	0	0	4	0	1	0	2	1	0	0	1	1
0	1	1	4	4	1	2	1	1	0	2	0	1	0	0	1	0	3	1	1	0	1	1
0	1	1	4	5	3	2	1	1	0	2	0	0	0	0	1	0	3	1	0	0	1	1
0	1	1	5	4	1	2	7	1	0	2	0	1	0	0	1	0	2	1	1	0	1	1
0	1	1	5	4	1	3	1	1	0	3	0	0	0	0	0	1	2	1	0	0	1	1
0	1	1	4	3	1	2	4	1	1	1	0	0	4	1	1	1	3	1	0	0	1	1
0	1	1	4	4	1	2	4	1	0	2	0	0	4	0	1	0	2	1	0	0	1	1
0	1	1	3	4	3	1	4	1	0	2	0	1	4	0	1	0	2	1	0	0	1	1
0	1	1	5	4	1	2	3	1	0	2	0	1	0	0	1	0	2	1	1	0	1	1
0	1	1	4	4	1	2	1	1	0	2	0	0	4	0	1	0	2	2	0	0	1	1
0	1	1	5	6	3	3	1	4	0	3	0	1	0	1	1	1	2	1	1	0	1	1
0	1	1	5	3	2	1	7	2	0	4	0	0	0	0	1	1	2	1	0	0	1	1
0	1	1	4	3	1	2	1	1	0	3	0	1	0	0	0	1	2	1	1	0	1	1
0	1	1	5	5	3	4	4	1	1	1	0	0	0	0	1	1	2	1	0	0	1	1
0	1	1	4	4	1	2	1	4	2	2	0	0	0	0	1	1	2	1	0	0	1	1
0	1	1	5	4	1	2	4	1	2	2	0	0	0	3	2	1	2	2	0	0	1	1
0	1	1	5	3	2	2	3	1	4	3	0	0	0	0	1	1	2	1	0	0	1	1
0	1	1	5	6	3	2	3	1	0	2	0	0	0	0	1	1	2	1	0	0	1	1
0	1	1	4	4	1	1	3	1	0	2	0	0	0	0	1	1	2	1	0	0	1	1
0	1	1	5	5	3	2	7	1	3	4	0	1	0	0	1	1	2	1	0	0	1	1
0	1	1	4	4	1	2	3	1	3	4	0	0	0	0	1	1	2	1	0	0	1	1
0	1	1	4	4	1	1	3	1	2	2	0	0	0	2	0	1	2	2	0	0	1	1
0	1	1	4	4	1	3	4	1	0	2	0	1	0	0	1	1	2	1	1	0	1	1
0	1	1	5	5	3	4	1	3	1	1	0	0	0	0	1	1	3	1	0	0	1	1
0	1	1	4	4	3	4	4	4	0	3	0	0	0	0	0	1	2	1	0	0	1	1
0	1	1	4	3	1	2	4	3	4	4	0	0	0	0	2	1	2	2	0	0	1	1
0	1	1	5	5	3	2	3	1	1	2	0	1	0	0	1	0	2	1	1	0	1	1
0	1	1	5	4	1	2	4	3	4	4	0	0	0	0	2	1	2	1	0	0	1	1
0	1	1	5	5	1	3	1	1	0	2	0	0	0	0	0	1	3	2	0	0	1	1
0	1	1	4	3	1	3	4	1	0	2	0	1	0	0	1	1	3	1	1	0	1	1
0	1	1	5	4	1	2	3	1	0	3	0	1	0	0	1	1	2	1	0	0	1	1
0	1	1	4	3	1	2	4	1	0	2	0	1	0	0	1	1	2	1	1	0	1	1
0	1	1	4	4	1	3	3	3	2	2	0	0	0	0	0	1	2	1	0	0	1	1
0	1	1	4	2	2	1	7	1	0	2	0	0	0	0	1	1	3	1	0	0	1	1
0	1	1	4	4	1	2	1	1	2	3	0	1	2	0	0	1	2	2	1	0	1	1
0	1	1	4	4	1	2	1	1	4	4	0	0	0	0	1	1	2	2	0	0	1	1
0	1	1	5	4	1	3	1	3	0	3	0	1	2	0	1	1	2	1	1	0	1	1
0	1	1	5	3	2	4	1	1	1	4	0	0	0	0	0	1	3	1	0	0	1	1
0	1	1	4	4	3	2	1	1	0	3	0	1	0	0	0	1	2	1	1	0	1	1
0	1	1	4	4	1	1	3	1	0	4	0	0	0	0	2	1	3	1	0	0	1	1
0	1	1	5	3	1	3	3	1	0	1	0	1	0	0	1	1	2	2	0	0	1	1
0	1	1	5	4	1	3	1	1	0	1	0	0	0	0	1	1	2	1	0	0	1	1
0	1	1	4	3	1	3	4	2	1	1	0	1	0	0	1	1	2	1	1	0	1	1
0	1	1	5	4	1	3	4	3	1	1	0	1	0	0	1	1	2	2	1	0	1	1
0	1	1	5	3	1	2	4	3	0	3	0	0	0	0	1	1	2	2	0	0	1	1
0	1	1	4	4	1	2	3	1	0	1	0	1	0	0	1	1	2	2	0	0	1	1
0	1	1	5	4	1	2	1	1	1	1	0	0	0	0	1	1	2	1	0	0	1	1
0	1	1	5	5	1	2	1	1	1	1	0	1	0	0	1	1	2	1	0	0	1	1
0	1	1	5	5	3	3	4	1	3	1	0	0	0	0	1	1	2	1	0	0	1	1
0	1	1	5	7	4	2	4	1	3	1	0	0	2	0	1	1	2	2	0	0	1	1
0	1	1	4	3	1	3	4	1	4	4	0	1	0	0	0	1	2	2	0	0	1	1
0	1	1	4	4	1	2	4	1	1	1	0	0	0	0	1	1	2	1	0	0	1	1
0	1	1	6	5	1	2	1	1	2	2	0	1	0	0	1	1	2	1	0	0	1	1
0	1	1	4	4	1	1	4	1	3	2	0	0	0	0	0	1	3	1	0	0	1	1
0	1	1	5	5	3	2	1	3	3	2	0	0	0	0	1	1	2	1	0	0	1	1
0	1	1	5	5	3	3	1	3	3	2	0	0	2	0	1	1	2	2	0	0	1	1
0	1	1	5	5	1	3	4	4	1	2	0	0	0	0	1	1	2	1	0	0	1	1
0	1	1	5	5	1	2	4	1	3	2	0	1	2	0	1	1	2	1	1	0	1	1
0	1	1	5	5	3	2	4	3	3	2	0	0	3	0	1	1	2	1	0	0	1	1
0	1	1	6	5	1	2	1	1	3	3	0	0	0	0	1	1	3	1	0	0	1	1
0	1	1	5	5	3	2	4	3	3	2	0	1	0	0	1	1	2	1	1	0	1	1
0	1	1	4	5	3	2	4	1	0	3	0	1	0	0	2	1	2	2	1	0	1	1
0	1	1	5	4	1	2	3	1	0	3	0	0	0	0	3	1	2	2	0	0	1	1
0	1	1	5	5	3	2	1	2	0	3	0	0	0	0	1	1	2	1	0	0	1	1
0	1	1	3	3	1	2	4	1	3	3	0	0	1	0	0	1	2	1	0	0	1	1
0	1	1	4	4	1	2	4	2	3	1	0	1	0	0	0	1	2	1	0	0	1	1
0	1	1	5	5	1	3	1	3	0	4	0	1	4	0	0	1	2	1	0	0	1	1
0	1	1	5	4	1	2	1	1	4	4	0	0	4	0	1	1	2	2	0	0	1	1
0	1	1	4	4	1	4	4	4	4	3	0	1	0	0	1	1	2	2	0	0	1	1
0	1	1	4	5	3	2	1	1	4	4	0	0	0	0	1	1	2	1	0	0	1	1
0	1	1	4	4	1	2	7	1	3	4	0	0	0	0	1	1	2	1	0	0	1	1
0	1	1	4	5	3	4	1	1	4	4	0	0	0	0	1	1	3	1	0	0	1	1
0	1	1	4	4	1	2	1	1	4	4	0	0	0	0	1	1	2	1	0	0	1	1
0	1	1	4	5	4	4	1	1	3	2	0	0	0	0	3	1	3	2	0	0	1	1
0	1	1	5	5	3	2	4	1	0	4	0	0	0	0	1	1	3	1	0	0	1	1
0	1	1	4	4	3	2	4	1	0	4	0	0	0	0	0	1	3	1	0	0	1	1
0	1	1	5	4	1	3	4	4	1	3	0	0	0	0	1	1	2	1	0	0	1	1
0	1	1	5	4	1	2	4	2	0	4	0	1	0	0	1	1	2	2	0	0	1	1
0	1	1	4	4	1	2	3	1	0	3	0	0	0	0	0	1	2	1	0	0	1	1
0	1	1	5	5	3	1	3	1	0	4	0	0	0	0	1	0	3	1	0	0	1	1
0	1	1	5	5	3	2	6	1	0	3	0	1	0	0	1	1	2	1	1	0	1	1
0	1	1	5	4	1	4	1	1	3	2	0	0	0	0	2	1	2	1	0	0	1	1
0	1	1	4	4	1	2	6	1	3	3	0	0	0	0	1	1	3	1	0	0	1	1
0	1	1	4	4	1	1	6	1	1	3	0	1	0	0	2	1	2	1	1	0	1	1
0	1	1	5	5	1	2	4	1	4	4	0	0	0	0	3	1	2	1	0	0	1	1
0	1	1	4	3	1	2	1	1	0	4	0	0	0	0	1	1	3	1	0	0	1	1
0	1	1	4	3	1	3	4	1	1	3	0	0	0	0	1	1	2	2	0	0	1	1
0	1	1	4	4	1	2	3	1	0	2	0	0	0	0	0	1	3	1	0	0	1	1
0	1	1	5	4	1	3	3	4	3	4	0	0	0	0	3	1	2	1	0	0	1	1
0	1	1	5	4	1	3	4	3	4	4	0	0	0	0	2	1	2	1	0	0	1	1
0	1	1	5	6	3	3	4	2	3	4	0	1	4	0	3	1	2	1	0	0	1	1
0	1	1	5	3	1	4	1	1	2	2	0	0	0	0	1	1	2	1	0	0	1	1
0	1	1	5	4	1	1	3	1	1	1	0	1	0	0	1	1	2	2	1	0	1	1
0	1	1	5	4	1	4	4	1	0	2	0	0	0	0	1	1	2	1	0	0	1	1
0	1	1	5	5	1	3	1	1	3	3	0	1	0	0	1	1	2	1	1	0	1	1
0	1	1	5	4	1	3	4	1	1	2	0	1	0	0	1	1	2	1	1	0	1	1
0	1	1	4	3	1	3	4	3	0	3	0	0	0	0	0	1	3	1	0	0	1	1
0	1	1	5	4	1	2	1	1	1	1	0	0	0	0	1	1	2	1	0	0	1	1
0	1	1	5	6	3	4	1	1	1	1	0	0	0	0	1	1	2	2	0	0	1	1
0	1	1	4	3	2	2	4	1	1	1	0	0	3	0	1	1	3	1	0	0	1	1
0	1	1	4	3	2	2	4	1	0	2	0	1	0	0	1	1	2	1	1	0	1	1
0	1	1	4	4	1	2	4	4	4	4	0	1	4	0	0	1	2	1	0	0	1	1
0	1	1	4	5	3	3	4	1	3	3	0	0	3	0	3	1	2	2	0	0	1	1
0	1	1	4	4	1	3	1	1	3	3	0	0	3	0	1	1	2	1	0	0	1	1
0	1	1	4	4	1	4	4	1	0	1	0	0	0	0	0	1	2	1	0	0	1	1
0	1	1	4	4	1	4	7	1	0	2	0	0	0	0	1	1	2	1	0	0	1	1
0	1	1	5	4	1	3	1	1	0	1	0	0	2	0	1	1	2	1	0	0	1	1
0	1	1	4	5	3	4	4	1	1	2	0	0	0	0	0	1	3	1	0	0	1	1
0	1	1	5	4	1	4	4	1	2	3	0	0	0	0	2	1	2	1	0	0	1	1
0	1	1	5	5	1	2	4	1	2	3	0	1	4	0	1	1	2	1	0	0	1	1
0	1	1	4	4	1	4	1	1	1	1	0	1	3	0	1	1	2	2	1	0	1	1
0	1	1	5	4	1	2	4	1	1	1	0	1	0	0	0	1	2	1	1	0	1	1
0	1	1	5	4	1	4	1	1	1	1	0	0	0	0	0	1	2	1	0	0	1	1
0	1	1	5	4	1	2	4	2	2	2	0	1	0	0	1	1	2	1	0	0	1	1
0	1	1	5	4	1	3	1	1	3	2	0	0	0	0	1	1	2	1	0	0	1	1
0	1	1	5	4	1	3	1	1	0	3	0	1	0	0	0	1	2	2	0	0	1	1
0	1	1	4	4	1	2	1	1	0	2	0	0	0	0	0	1	2	1	0	0	1	1
0	1	1	5	4	1	2	1	1	0	2	0	1	4	0	1	1	2	1	1	0	1	1
0	1	1	5	4	1	4	4	3	3	2	0	0	4	0	1	1	2	1	0	0	1	1
0	1	1	5	5	1	2	1	1	0	3	0	0	0	0	0	1	2	1	0	0	1	1
0	1	1	5	5	3	4	1	2	2	2	0	1	4	4	2	1	2	2	1	0	1	1
0	1	1	5	5	1	4	4	1	3	3	0	0	0	4	4	1	2	2	0	0	1	1
0	1	1	5	4	1	3	4	2	1	2	0	1	0	0	1	1	3	1	1	0	1	1
0	1	1	5	4	1	2	4	1	3	3	0	0	0	0	1	1	2	1	0	0	1	1
0	1	1	5	4	1	3	1	2	0	2	0	1	0	0	1	1	3	2	1	0	1	1
0	1	1	5	4	1	4	1	1	2	1	0	1	0	0	2	1	3	2	0	0	1	1
0	1	1	4	5	3	3	4	2	0	2	0	0	0	0	2	1	3	1	0	0	1	1
0	1	1	4	4	1	1	4	2	0	2	0	1	0	0	1	1	3	1	1	1	1	1
0	1	1	5	3	1	2	4	1	1	1	0	0	0	0	1	1	2	1	0	0	1	1
0	1	1	4	4	1	3	1	1	4	3	0	1	0	0	3	1	2	2	1	0	1	1
0	1	1	5	4	1	4	4	1	1	1	0	0	0	0	0	1	2	1	0	0	1	1
0	1	1	5	3	1	1	1	1	0	3	0	0	4	0	1	1	2	2	0	0	1	1
0	1	1	5	4	1	4	4	1	2	3	0	0	3	0	1	1	2	1	0	0	1	1
0	1	1	5	5	1	3	4	1	1	1	0	0	0	0	4	1	2	1	0	0	1	1
0	1	1	5	5	3	2	1	1	0	3	0	1	3	0	1	1	2	1	1	0	1	1
0	1	1	5	4	1	2	1	1	3	3	0	1	0	0	0	1	2	1	0	0	1	1
0	1	1	4	3	1	3	1	1	3	3	0	1	0	0	0	1	2	1	1	0	1	1
0	1	1	4	6	4	4	4	1	0	2	0	1	0	0	0	1	2	2	1	0	1	1
0	1	1	5	4	1	2	4	1	1	1	0	1	0	0	1	1	2	2	0	0	1	1
0	1	1	5	4	1	2	1	1	1	1	0	0	0	0	1	1	2	1	0	0	1	1
0	1	1	5	4	1	3	4	1	0	2	0	0	0	0	1	1	2	1	0	0	1	1
0	1	1	4	5	4	2	4	1	0	2	0	0	4	0	1	1	3	1	0	0	1	1
0	1	1	4	4	1	2	4	3	4	1	0	1	0	0	0	1	2	2	1	0	1	1
0	1	1	5	5	3	1	1	1	0	1	0	1	3	0	1	1	2	2	0	0	1	1
0	1	1	4	4	3	4	4	1	1	1	0	0	0	0	1	1	3	1	0	0	1	1
0	1	1	5	5	3	2	4	1	0	2	0	1	4	0	1	1	2	1	1	0	1	1
0	1	1	5	4	1	2	4	1	0	0	0	0	0	0	1	1	2	1	0	0	1	1
0	1	1	4	4	1	2	4	1	4	4	0	0	0	0	0	1	3	2	0	0	1	1
0	1	1	4	4	1	2	4	1	0	3	0	0	0	0	1	1	2	2	0	0	1	1
0	1	1	5	5	1	2	4	1	0	4	0	1	0	0	1	1	2	2	0	0	1	1
0	1	1	5	5	3	3	1	1	4	4	0	0	4	4	4	1	2	2	0	0	1	1
0	1	1	4	4	1	2	7	1	3	3	0	0	0	0	3	1	2	1	1	0	1	1
0	1	1	5	5	1	2	1	1	0	1	0	1	3	0	0	1	2	1	0	0	1	1
0	1	1	5	4	1	1	1	2	1	2	0	0	4	0	1	1	3	1	0	0	1	1
0	1	1	4	5	3	2	4	1	0	2	0	0	0	0	1	1	2	2	0	0	1	1
0	1	1	5	6	3	2	1	2	1	3	0	0	0	0	0	1	2	1	0	0	1	1
0	1	1	4	4	1	2	4	1	0	2	0	1	4	0	1	1	3	1	1	0	1	1
0	1	1	4	4	1	4	1	1	0	2	0	0	0	0	1	1	3	1	0	0	1	1
0	1	1	4	3	1	1	1	1	0	2	0	0	4	4	2	1	2	1	0	0	1	1
0	1	1	4	4	1	3	4	1	2	2	0	0	0	0	1	1	3	1	0	0	1	1
0	1	1	6	6	3	2	3	1	1	1	0	1	0	0	1	1	2	2	0	0	1	1
0	1	1	5	4	1	2	1	2	0	2	0	1	0	0	1	1	2	2	1	0	1	1
0	1	1	4	4	1	1	1	1	3	2	0	0	0	0	0	1	3	2	0	0	1	1
0	1	1	4	3	1	2	1	1	3	2	0	1	0	0	0	1	2	2	0	0	1	1
0	1	1	5	5	3	3	7	3	0	2	0	0	0	0	1	1	3	1	0	0	1	1
0	1	1	5	4	1	2	4	2	3	2	0	1	4	0	2	1	2	1	0	0	1	1
0	1	1	5	4	1	2	4	1	1	1	0	0	0	0	1	1	2	1	0	0	1	1
0	1	1	5	4	1	2	4	1	2	2	0	1	0	0	0	1	2	2	1	0	1	1
0	1	1	5	5	3	3	1	1	1	2	0	0	2	2	2	1	2	2	0	0	1	1
0	1	1	5	3	2	2	4	1	2	3	0	1	0	0	1	1	2	2	0	0	1	1
0	1	1	5	5	3	1	4	1	0	2	0	0	0	0	1	1	2	1	0	0	1	1
0	1	1	5	5	1	2	4	1	0	2	0	1	0	0	0	1	3	1	1	0	1	1
0	1	1	4	4	1	4	7	1	1	3	0	1	4	4	1	1	2	1	0	0	1	1
0	1	1	4	4	3	4	4	1	4	4	0	0	4	4	1	1	2	1	0	0	1	1
0	1	1	4	4	1	1	3	2	0	3	0	0	0	0	3	1	2	1	0	0	1	1
0	1	1	4	4	1	2	7	4	4	2	0	1	4	4	4	1	2	1	1	0	1	1
0	1	1	4	4	1	2	4	1	0	2	0	0	4	0	1	1	2	1	0	0	1	1
0	1	1	5	4	1	4	7	2	0	3	0	1	0	0	2	1	2	2	0	0	1	1
0	1	1	4	4	1	2	7	2	0	2	0	1	0	0	1	1	2	1	0	0	1	1
0	1	1	5	4	1	2	4	1	3	2	0	0	4	0	2	1	2	1	0	0	1	1
0	1	1	4	5	3	1	3	1	0	2	0	0	0	0	0	1	2	1	0	0	1	1
0	1	1	4	3	1	3	4	1	0	1	0	1	0	0	1	1	2	1	0	0	1	1
0	1	1	5	4	1	2	4	1	0	3	0	0	4	0	0	1	2	2	0	0	1	1
0	1	1	5	4	1	3	7	2	3	2	0	0	4	0	3	1	2	1	0	0	1	1
0	1	1	5	5	3	4	4	1	3	3	0	1	3	0	0	1	2	1	1	0	1	1
0	1	1	4	4	1	4	4	1	3	3	0	0	3	0	0	1	2	1	0	0	1	1
0	1	1	5	4	1	2	3	2	0	2	0	0	0	0	0	1	2	1	0	0	1	1
0	1	1	4	4	3	1	3	1	1	2	0	1	0	0	1	1	2	1	1	0	1	1
0	1	1	4	3	2	3	3	2	2	2	0	0	0	0	0	1	2	1	0	0	1	1
0	1	1	5	7	4	1	1	1	1	1	0	0	0	0	0	1	2	2	0	0	1	1
0	1	1	4	4	1	2	4	4	1	1	0	1	0	0	2	1	2	1	1	0	1	1
0	1	1	5	4	1	3	1	1	1	1	0	1	0	0	1	1	2	1	1	0	1	1
0	1	1	6	5	1	2	7	1	0	3	0	0	0	0	1	1	3	2	0	0	1	1
0	1	1	5	5	3	3	4	1	0	4	0	0	0	0	1	1	2	1	0	0	1	1
0	1	1	5	3	2	3	3	3	0	3	0	0	0	0	1	1	2	1	0	0	1	1
0	1	1	4	5	3	4	1	2	2	3	0	0	3	0	0	1	2	1	0	0	1	1
0	1	1	4	4	1	4	4	2	2	2	0	0	3	0	3	1	3	1	0	0	1	1
0	1	1	4	3	1	3	1	2	2	2	0	1	3	0	2	1	2	1	0	0	1	1
0	1	1	5	4	1	3	1	1	4	1	0	1	0	0	1	1	2	1	0	0	1	1
0	1	1	4	4	1	4	4	1	2	2	0	1	0	0	1	1	3	2	1	0	1	1
0	1	1	5	4	1	4	4	1	0	2	0	0	4	4	1	1	3	2	0	0	1	1
0	1	1	5	4	1	2	7	1	1	1	0	1	0	0	1	1	2	2	0	0	1	1
0	1	1	5	4	1	1	7	1	1	1	0	0	0	0	0	1	2	1	0	0	1	1
0	1	1	4	3	1	2	4	1	0	2	0	0	0	0	0	1	2	1	0	0	1	1
0	1	1	5	4	1	4	1	1	4	4	0	0	0	0	1	1	3	1	0	0	1	1
0	1	1	4	5	3	2	4	1	0	2	0	0	0	0	1	1	2	1	0	0	1	1
0	1	1	6	6	3	2	4	1	1	1	0	0	0	0	1	1	2	2	0	0	1	1
0	1	1	5	4	1	2	1	1	1	1	0	1	0	0	1	1	2	1	0	0	1	1
0	1	1	6	5	1	1	3	1	1	1	0	0	0	0	0	1	2	2	0	0	1	1
0	1	1	5	4	1	3	1	1	1	1	0	1	0	0	0	1	2	2	1	0	1	1
0	1	1	5	4	1	4	1	1	1	1	0	0	0	0	0	1	2	1	0	0	1	1
0	1	1	4	4	1	2	3	1	1	2	0	1	0	0	0	1	2	1	1	0	1	1
0	1	1	4	4	1	1	4	2	3	2	0	0	4	0	1	1	3	1	0	0	3	1
0	1	1	5	6	3	1	1	1	1	1	0	1	0	0	1	1	2	2	1	0	3	1
0	1	1	4	2	2	1	4	1	0	1	0	1	0	0	1	1	2	2	0	0	3	1
0	1	1	5	7	4	3	4	1	4	4	0	0	0	0	0	1	2	1	0	0	3	1
0	1	1	5	6	3	2	4	1	2	2	0	0	0	0	1	1	2	1	0	0	3	1
0	1	1	5	5	3	3	1	3	2	1	0	0	4	1	2	1	2	1	0	0	3	1
0	1	1	4	4	3	1	6	1	0	1	0	1	0	0	2	1	2	2	0	0	3	1
0	1	1	4	4	1	3	1	3	3	2	0	1	0	0	2	1	2	1	1	0	3	2
0	1	1	4	5	3	1	4	3	2	3	0	1	0	0	0	1	2	1	0	0	3	2
0	1	1	5	5	3	2	4	3	2	2	0	0	0	2	3	1	3	1	0	0	3	2
0	1	1	5	5	3	2	4	3	2	3	0	0	0	2	2	1	3	1	0	0	3	2
0	1	1	5	5	3	2	3	3	2	3	0	1	0	2	2	1	2	2	0	0	3	2
0	1	1	5	5	3	2	4	3	3	3	0	0	0	0	2	1	3	1	0	0	3	2
0	1	1	5	5	3	2	3	3	2	3	0	0	2	2	2	1	3	1	0	0	3	2
0	1	1	5	5	3	2	4	3	3	3	0	0	0	2	2	1	3	1	0	0	3	2
0	1	1	5	4	1	2	6	1	1	1	0	0	4	0	0	1	2	2	0	0	3	1
0	1	1	4	5	3	2	6	2	2	2	0	0	0	0	0	1	2	1	0	0	3	1
0	1	1	4	4	1	1	3	2	2	2	0	0	0	0	1	1	2	1	0	0	3	1
0	1	1	5	5	3	4	4	1	2	2	0	0	0	0	1	1	2	1	0	0	3	1
0	1	1	4	3	1	3	7	1	1	3	0	0	4	0	0	1	2	2	0	0	3	1
0	1	1	4	3	1	1	4	1	3	3	0	1	4	0	0	1	2	2	1	0	3	1
0	1	1	4	4	1	3	1	1	0	1	0	0	0	0	1	1	2	2	0	0	3	1
0	1	1	5	4	1	3	6	2	3	2	0	0	4	0	0	1	2	1	0	0	3	1
0	1	1	5	5	3	1	6	2	0	2	0	1	0	0	1	1	2	1	1	0	3	1
0	1	1	5	6	3	2	4	1	0	2	0	0	0	0	1	1	2	1	0	0	3	1
0	1	1	5	4	1	3	4	2	4	2	0	0	0	0	2	1	2	1	1	0	3	1
0	1	1	5	5	3	2	4	1	1	2	0	0	4	0	0	1	2	2	0	0	3	1
0	1	1	4	5	3	2	7	1	1	1	0	1	4	0	1	1	3	1	0	0	3	1
0	1	1	5	6	3	2	3	1	2	2	0	0	0	0	1	1	2	1	0	0	3	1
0	1	1	4	4	1	4	4	1	2	2	0	0	0	0	0	1	2	2	0	0	3	1
0	1	1	4	4	1	3	4	1	0	1	0	0	3	0	1	1	2	1	0	0	3	1
0	1	1	5	5	3	4	1	1	1	1	0	1	0	0	0	1	2	1	0	0	3	1
0	1	1	4	3	1	2	1	3	2	3	0	1	3	0	0	1	2	2	1	0	3	1
0	1	1	5	4	1	3	3	1	3	3	0	1	0	0	1	1	2	1	1	0	3	1
0	1	1	4	3	1	2	4	2	3	3	0	0	4	0	1	1	2	1	0	0	3	1
0	1	1	4	4	1	4	4	4	4	4	0	1	3	0	0	1	2	1	1	0	3	1
0	1	1	5	4	1	1	4	2	3	2	0	1	0	0	2	1	2	1	0	0	3	1
0	1	1	5	4	1	2	3	2	3	2	0	1	0	0	0	1	2	2	1	0	3	1
0	1	1	4	4	1	2	4	1	2	2	0	1	3	0	1	1	2	1	1	0	3	1
0	1	1	5	4	1	2	4	1	2	2	0	1	4	0	1	1	2	1	1	0	3	1
0	1	1	4	5	3	2	6	2	2	2	0	0	0	0	0	1	2	1	0	0	3	1
0	1	1	4	4	1	1	7	3	3	3	0	0	0	0	0	1	2	2	0	0	3	1
0	1	1	4	3	1	2	7	1	0	4	0	1	0	0	0	1	2	2	0	0	3	1
0	1	1	5	4	1	3	3	1	2	2	0	0	3	0	1	1	2	1	0	0	3	1
0	1	1	3	4	3	1	6	1	0	4	0	0	0	0	1	1	2	1	0	0	3	1
0	1	1	5	5	3	2	4	1	0	2	0	0	0	0	1	1	2	1	0	0	3	1
0	1	1	5	5	3	2	7	3	4	3	0	0	4	0	1	1	2	1	0	0	3	1
0	1	1	4	4	1	4	4	1	1	2	0	0	0	0	0	1	2	1	0	0	3	1
0	1	1	4	3	1	2	4	4	4	4	0	0	0	0	3	1	2	1	0	0	3	1
0	1	1	4	3	1	1	7	2	3	3	0	0	0	0	0	1	3	1	0	0	3	1
0	1	1	5	4	1	3	3	1	3	1	0	0	0	0	2	1	2	1	0	0	3	1
0	1	1	4	5	3	2	4	3	3	4	0	1	4	0	0	1	2	1	1	0	3	1
0	1	1	5	4	1	3	7	1	1	2	0	0	4	0	0	1	2	2	0	0	3	1
0	1	1	5	5	1	2	4	2	0	4	0	1	0	0	3	1	2	2	0	0	3	1
0	1	1	5	3	2	3	1	2	3	3	0	0	0	0	1	1	2	1	0	1	3	1
0	1	1	4	4	1	1	1	2	2	2	0	0	0	0	1	1	2	1	0	0	3	1
0	1	1	5	5	3	2	4	2	3	2	0	0	4	0	1	1	2	1	0	0	3	1
0	1	1	5	5	1	3	1	1	1	1	0	0	0	0	1	1	2	1	0	0	3	1
0	1	1	4	4	1	2	7	2	0	2	0	1	0	0	1	1	2	1	0	0	3	1
0	1	1	4	4	1	2	4	1	1	2	0	0	4	0	1	1	2	1	0	0	3	1
0	1	1	5	4	1	3	1	2	3	1	0	0	0	0	1	1	2	1	0	0	3	1
0	1	1	5	4	1	4	4	1	1	2	0	0	4	0	4	1	2	1	0	0	3	1
0	1	1	3	3	1	2	4	4	0	2	0	0	0	0	1	1	2	1	0	0	3	1
0	1	1	4	5	3	1	7	2	0	2	0	1	0	0	1	1	2	1	1	0	3	1
0	1	1	4	4	3	2	4	1	2	2	0	1	3	0	2	1	2	2	1	0	3	1
0	1	1	5	3	1	2	7	1	1	4	0	0	0	0	0	1	2	1	0	0	3	1
0	1	1	4	4	1	2	4	1	2	2	0	0	3	0	1	1	2	1	0	0	3	1
0	1	1	5	4	1	1	4	3	0	3	0	0	0	0	1	1	2	1	0	0	3	1
0	1	1	5	5	1	1	4	3	0	3	0	0	2	0	2	1	2	2	0	0	3	1
0	1	1	5	4	1	2	4	2	2	2	0	1	4	0	0	1	2	1	1	0	3	1
0	1	1	5	5	3	2	3	4	0	3	0	0	0	0	0	1	3	1	0	0	3	1
0	1	1	5	5	3	3	4	1	0	4	0	0	0	0	0	1	2	1	0	0	3	1
0	1	1	5	4	1	3	1	1	1	1	0	0	0	0	0	1	3	1	0	0	3	1
0	1	1	5	5	3	4	4	1	4	1	0	0	4	1	1	1	2	2	0	0	3	1
0	1	1	4	5	3	1	6	1	4	3	0	0	0	0	1	1	3	2	0	0	3	1
0	1	1	4	3	1	2	4	1	1	4	0	1	0	0	1	1	3	1	0	0	3	1
0	1	1	4	5	3	2	4	1	0	4	0	1	0	0	0	1	3	1	0	0	3	1
0	1	1	5	5	3	3	4	4	1	3	0	1	0	0	0	1	2	2	0	0	3	1
0	1	1	5	5	3	3	4	1	4	4	0	0	4	4	1	1	3	2	0	0	3	1
0	1	1	5	4	1	2	4	1	0	3	0	1	3	0	0	1	3	1	1	0	3	1
0	1	1	5	6	3	2	4	2	2	2	0	0	0	0	0	1	2	2	0	0	3	1
0	1	1	5	4	1	1	4	3	3	3	0	1	0	0	0	1	2	2	0	0	3	1
0	1	1	4	3	1	1	6	1	1	4	0	0	0	0	4	1	2	1	0	0	3	1
[truncated: 74,360 more rows]
